# Supplementary material for: Regulatable selective synthesis of benzofurans and coumarins from aryl propargyl ethers via an electrochemical tandem cyclization reaction
Source: Royal Society of Chemistry journal article supplement (doi:10.1039/d4gc03842h), 2024-01-01

## Electronic Supplementary Information

for

### Regulable selective synthesis of benzofurans and coumarins from aryl propargyl ethers via electrochemical tandem cyclization reaction

Zhaoyue Feng, Xueyi Guan, Haiyang Ma, Yingsibing Fan, Ping Liu\* and Peipei Sun\*

*School of Chemistry and Materials Science, Jiangsu Provincial Key Laboratory of Material Cycle*

*Processes and Pollution Control, Jiangsu Collaborative Innovation Center of Biomedical*

*Functional Materials, Nanjing Normal University, Nanjing 210023, China.*

*pingliu@njnu.edu.cn; sunpeipei@njnu.edu.cn*

#### Contents

|                                                                                   |         |
|-----------------------------------------------------------------------------------|---------|
| 1. General information                                                            | S       |
| 2                                                                                 |         |
| 2. Experimental procedures                                                        | S2-S5   |
| 3. Mechanistic studies                                                            | S5-S11  |
| 4. Experimental data for the products <b>3</b> , <b>4</b> , <b>5</b> and <b>6</b> | S11-S34 |
| 5. <sup>1</sup> H and <sup>13</sup> C NMR spectra of the products                 | S35-S96 |

## 1 General information

All reagents were obtained from commercial suppliers and used without further purification. Platinum plate electrode (10 mm × 10 mm × 0.1 mm), purity above 99.99%, Beijing Jingke Keyi scientific instrument Co., Ltd., China; Graphite felt electrode (10 mm × 40 mm × 2 mm), purity 93-99.9%, Inner Mongolia Wanxing carbon Co., Ltd., China. Reactions were monitored by thin layer chromatography. Column chromatography was performed using silica gel (300–400 mesh). The NMR spectra were recorded on a Bruker Avance 400 spectrometer at 400 MHz (<sup>1</sup>H) and 100 MHz (<sup>13</sup>C) in CDCl<sub>3</sub> using tetramethylsilane as the internal standard. The following abbreviations were used to explain the multiplicities: s = singlet, brs = broad singlet, d = doublet, t = triplet, dd = doublet of doublet, dt = doublet of triplet, td = triplet of doublet, q = quartet, m = multiplet. High-resolution mass spectra were obtained with an AB Triple 5600 mass spectrometer by ESI on a TOF mass analyzer. Melting points are uncorrected.

## 2 Experimental procedures

### 2.1 General procedure for the electrochemical reaction

#### 2.1.1 General procedure for the synthesis of benzofuran derivatives (taking **3a** as an example)

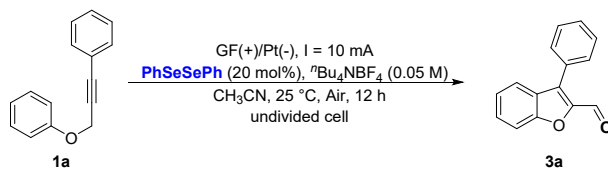

An oven-dried undivided three-necked flask (25 mL) was charged with 1,2-diphenyldiselenane (**2a**, 31.2 mg, 0.1 mmol), <sup>t</sup>Bu<sub>4</sub>NBF<sub>4</sub> (164.6 mg, 0.5 mmol). Then CH<sub>3</sub>CN (10 mL) and (3-phenoxyprop-1-yn-1-yl)benzene (**1a**, 104.0 mg, 94.5 μL, 0.5 mmol) were added. The flask was equipped with graphite felt electrode (10 mm × 30 mm) as the anode and platinum plate electrode (10 mm × 10 mm) as the cathode (Fig. S1). The reaction mixture was stirred and electrolyzed at a constant current (10 mA) at 25 °C for 12 h. After the reaction was completed, the resulting solution was diluted with EtOAc (10 mL). The organic layer was washed with water (10 mL). The aqueous phase was re-extracted with EtOAc (10 mL × 2). The combined organic layers were dried over Na<sub>2</sub>SO<sub>4</sub> and concentrated in vacuum. Subsequently, the crude residue was purified by silica gel chromatography using petroleum ether/ethyl acetate (50:1, v/v) as eluent to afford the desired product **3a** 97.7 mg (yield 88%).

Similar result (86% yield) was obtained when Pt electrode provided by another company (10 mm × 10 mm × 0.2 mm, purity above 99.95%, Shanghai Chuxi Industrial Co., Ltd., China) was used.

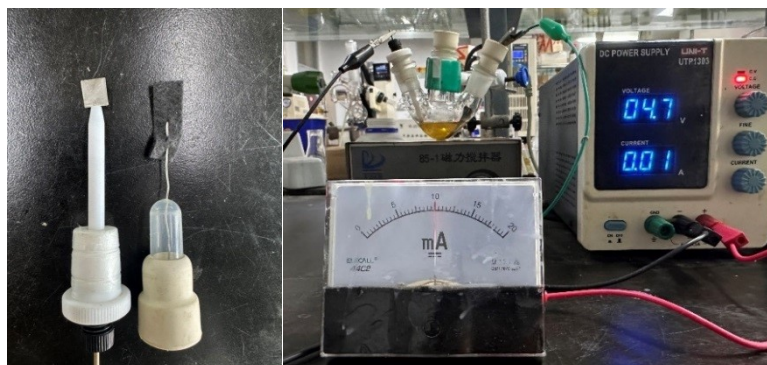

**Figure S1** Electrodes and reaction setup for the synthesis of product **3**.

### 2.1.2 General procedure for the synthesis of coumarin derivatives (taking **4a** as an example)

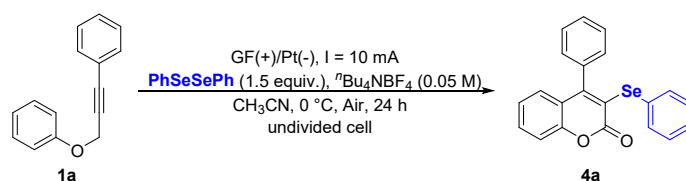

An oven-dried undivided three-necked flask (25 mL) was charged with 1,2-diphenyldiselenane (**2a**, 234.1 mg, 0.75 mmol),  $n\text{Bu}_4\text{NBF}_4$  (164.6 mg, 0.5 mmol). Then  $\text{CH}_3\text{CN}$  (10 mL) and (3-phenoxyprop-1-yn-1-yl)benzene (**1a**, 104.0 mg, 94.5  $\mu\text{L}$ , 0.5 mmol) were added. The flask was equipped with graphite felt electrode (10 mm × 30 mm) as the anode and platinum plate electrode (10 mm × 10 mm) as the cathode (Fig. S2). The reaction mixture was stirred and electrolyzed at a constant current (10 mA) at 0 °C for 24 h. After being warmed to room temperature, the resulting solution was diluted with EtOAc (10 mL). The organic layer was washed with water (10 mL). The aqueous phase was re-extracted with EtOAc (10 mL × 2). The combined organic layers were dried over  $\text{Na}_2\text{SO}_4$  and concentrated in vacuum. Subsequently, the crude residue was purified by silica gel chromatography using petroleum ether/ethyl acetate (20:1, v/v) as eluent to afford the desired product **4a** 143.6 mg (yield 76%).

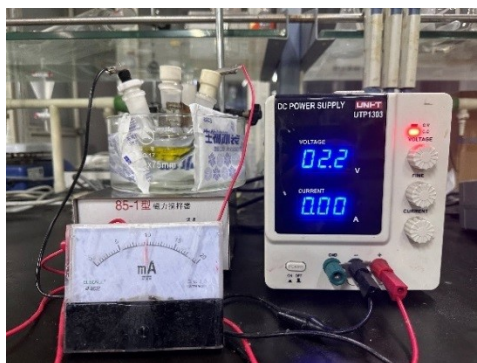

**Figure S2** Reaction setup for the synthesis of product 4.

## 2.2 General procedure for the gram-scale experiment

### 2.2.1 Gram-scale synthesis of 3a

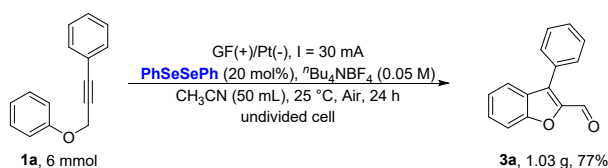

In an undivided three-necked flask (100 mL), 1,2-diphenyldisilane (**2a**, 374.6 mg, 1.2 mmol),  $n\text{Bu}_4\text{NBF}_4$  (823.2 mg, 2.5 mmol),  $\text{CH}_3\text{CN}$  (50 mL) and (3-phenoxyprop-1-yn-1-yl)benzene (**1a**, 1.25 g, 1.13 mL, 6 mmol) were continuously added. The flask was equipped with a graphite felt electrode as the anode and a platinum plate electrode (15 mm × 15 mm) as the cathode. The reaction mixture was stirred and electrolyzed at a constant current (30 mA) under air at 25 °C for 24 h. After the reaction was completed, the resulting solution was diluted with EtOAc (50 mL). The organic layer was washed with water (50 mL). The aqueous phase was re-extracted with EtOAc (50 mL × 2). The combined organic layers were dried over  $\text{Na}_2\text{SO}_4$  and concentrated in vacuum. Subsequently, the crude residue was purified by silica gel chromatography using petroleum ether/ethyl acetate (50:1, v/v) as eluent to afford the desired product **3a** 1.03 g (yield 77%).

### 2.2.2 Gram-scale synthesis of 4a

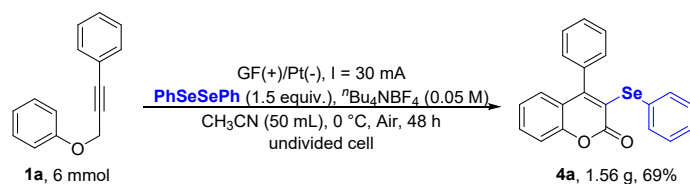

In an undivided three-necked flask (100 mL), 1,2-diphenyldisilane (**2a**, 2.81 g, 9 mmol),  $n\text{Bu}_4\text{NBF}_4$  (823.2 mg, 2.5 mmol),  $\text{CH}_3\text{CN}$  (50 mL) and (3-phenoxyprop-1-yn-1-yl)benzene (**1a**, 1.25 g, 1.13 mL, 6 mmol) were continuously added. The flask was equipped with a graphite felt

electrode as the anode and a platinum plate electrode (15 mm × 15 mm) as the cathode. The reaction mixture was stirred and electrolyzed at a constant current (30 mA) under air at 0 °C for 48 h. After the reaction was completed, the resulting solution was diluted with EtOAc (50 mL). The organic layer was washed with water (50 mL). The aqueous phase was re-extracted with EtOAc (50 mL × 2). The combined organic layers were dried over Na<sub>2</sub>SO<sub>4</sub> and concentrated in vacuum. Subsequently, the crude residue was purified by silica gel chromatography using petroleum ether/ethyl acetate (20:1, v/v) as eluent to afford the desired product **4a** 1.56 g (yield 69%).

## 2.3 Procedures for the further transformation of products

### 2.3.1 The transformation of **3a** to **5**

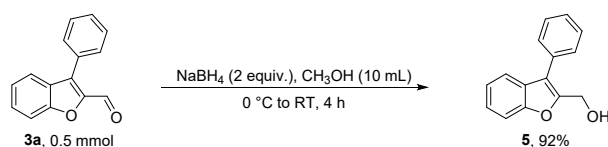

In a Schlenk flask (25 mL), **3a** (0.5 mmol, 111.0 mg), NaBH<sub>4</sub> (1.0 mmol, 37.8 mg) and CH<sub>3</sub>OH (10 mL) were added slowly at 0 °C. After stirring for 4 h at room temperature, the mixture was quenched with saturated aqueous solution of NH<sub>4</sub>Cl, and extracted with ethyl acetate, and the combined organic phases were dried over anhydrous Na<sub>2</sub>SO<sub>4</sub>, filtered, concentrated in *vacuo*. Subsequently, the crude residue was purified by silica gel chromatography using petroleum ether/ethyl acetate (4:1, v/v) as eluent to afford the desired product **5** 103.1 mg (yield 92%).

### 2.3.1 The transformation of **4a** to **6**

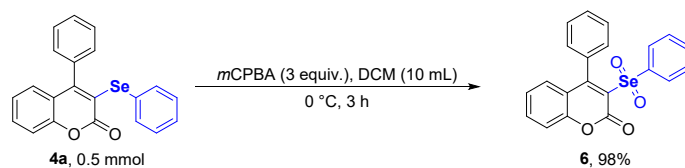

In a Schlenk flask (25 mL), **4a** (0.5 mmol, 189.0 mg), *m*CPBA (1.5 mmol, 258.9 mg) and DCM (10 mL) were added in sequence. After stirring for 3 h at 0 °C, the mixture was quenched with water, and extracted with ethyl acetate, and the combined organic phases were dried over anhydrous Na<sub>2</sub>SO<sub>4</sub>, filtered, concentrated in *vacuo*. Subsequently, the crude residue was purified by silica gel chromatography using petroleum ether/ethyl acetate (1:1, v/v) as eluent to afford the desired product **6** 200.9 mg (yield 98%).

## 3. Mechanistic studies

### 3.1 Control experiments

### 3.1.1 Radical inhibition reaction

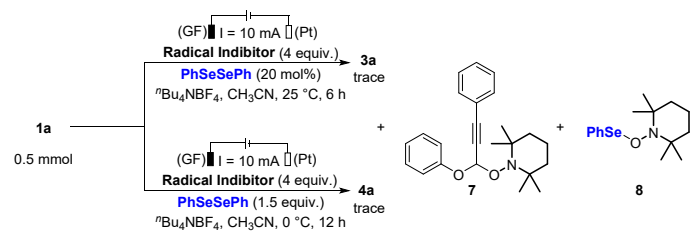

**7**, HRMS (ESI-TOF)  $m/z$   $[\text{M}+\text{H}]^+$  calcd for  $\text{C}_{24}\text{H}_{30}\text{NO}_2^+$ , 364.2272; found 364.2267.

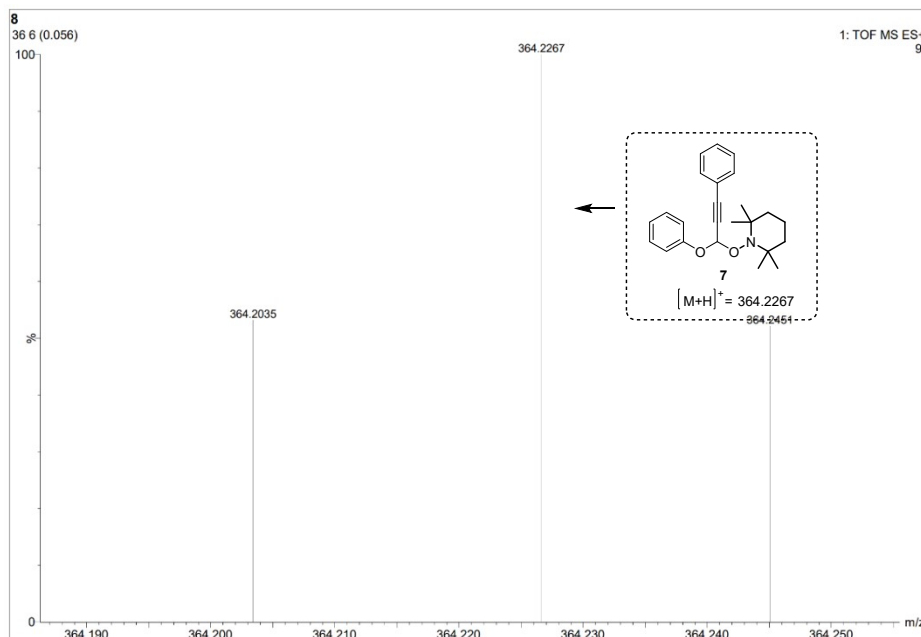

**Figure S3** HRMS analysis of the radical-trapping product **7**.

**8**, HRMS (ESI-TOF)  $m/z$   $[\text{M}+\text{H}]^+$  calcd for  $\text{C}_{15}\text{H}_{24}\text{NOSe}^+$ , 314.1018; found 314.1019.

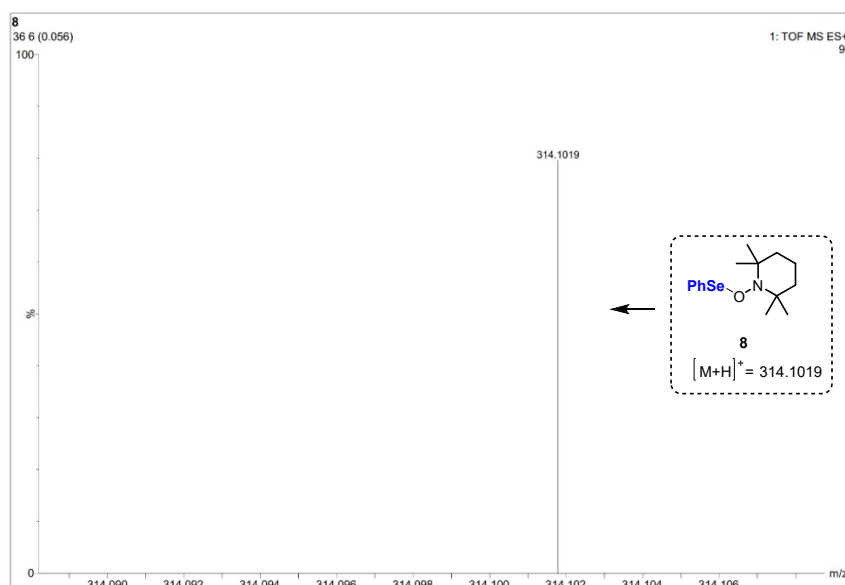

**Figure S4** HRMS analysis of the radical-trapping product **8**.

### 3.1.2 <sup>18</sup>O-Labeling experiment

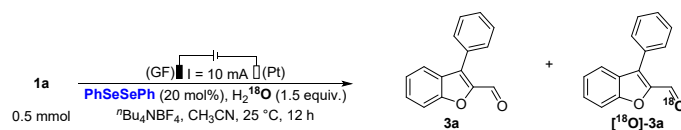

In an undivided three-necked flask (25 mL), 1,2-diphenyldiselenane (**2a**, 31.2 mg, 0.1 mmol),  ${}^t\text{Bu}_4\text{NBF}_4$  (164.6 mg, 0.5 mmol),  $\text{CH}_3\text{CN}$  (10 mL),  $\text{H}_2^{18}\text{O}$  (30.0 mg, 27.2  $\mu\text{L}$ , 1.5 mmol) and (3-phenoxyprop-1-yn-1-yl)benzene (**1a**, 104.0 mg, 94.5  $\mu\text{L}$ , 0.5 mmol) were continuously added. The flask was equipped with a graphite felt electrode (10 mm  $\times$  30 mm) as the anode and a platinum plate electrode (10 mm  $\times$  10 mm) as the cathode. The reaction mixture was stirred and electrolyzed at a constant current (10 mA) under air at 25 °C for 12 h. The <sup>18</sup>O-labeled product was determined by HRMS (Fig. S5).

**[<sup>18</sup>O]-3a**, HRMS (ESI-TOF)  $m/z$   $[\text{M}+\text{H}]^+$  calcd for  $\text{C}_{15}\text{H}_{11}\text{O}^{18}\text{O}^+$ , 225.0796; found 225.0799.

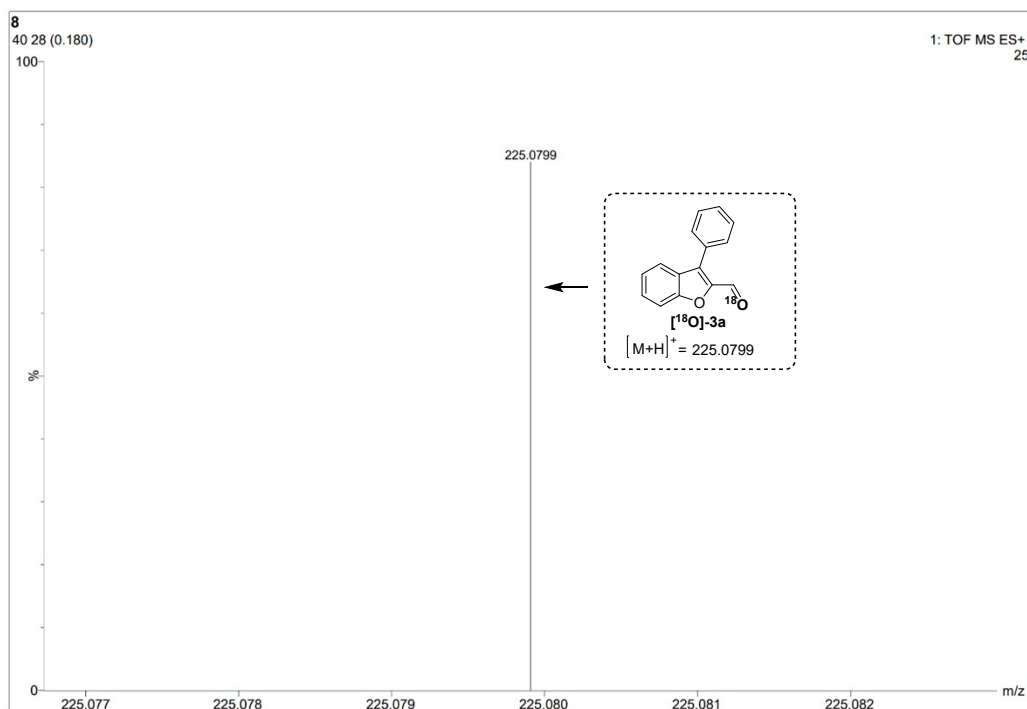

**Figure S5** HRMS analysis of the <sup>18</sup>O-labeled product **[<sup>18</sup>O]-3a**.

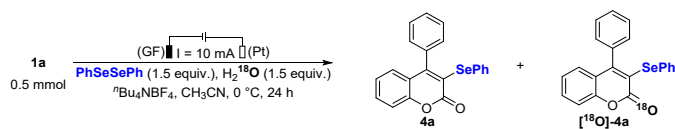

In an undivided three-necked flask (25 mL), 1,2-diphenyldiselenane (**2a**, 234.1 mg, 0.75 mmol),  $n\text{Bu}_4\text{NBF}_4$  (164.6 mg, 0.5 mmol),  $\text{CH}_3\text{CN}$  (10 mL),  $\text{H}_2^{18}\text{O}$  (30.0 mg, 27.2  $\mu\text{L}$ , 1.5 mmol) and (3-phenoxyprop-1-yn-1-yl)benzene (**1a**, 104.0 mg, 94.5  $\mu\text{L}$ , 0.5 mmol) were continuously added. The flask was equipped with a graphite felt electrode (10 mm  $\times$  30 mm) as the anode and a platinum plate electrode (10 mm  $\times$  10 mm) as the cathode. The reaction mixture was stirred and electrolyzed at a constant current (10 mA) under air at 0  $^\circ\text{C}$  for 24 h. The  $^{18}\text{O}$ -labeled product was determined by HRMS (Fig. S6).

$[^{18}\text{O}]\text{-4a}$ , HRMS (ESI-TOF)  $m/z$   $[\text{M}+\text{H}]^+$  calcd for  $\text{C}_{21}\text{H}_{15}\text{O}^{18}\text{OSe}^+$ , 381.0275; found 381.0269.

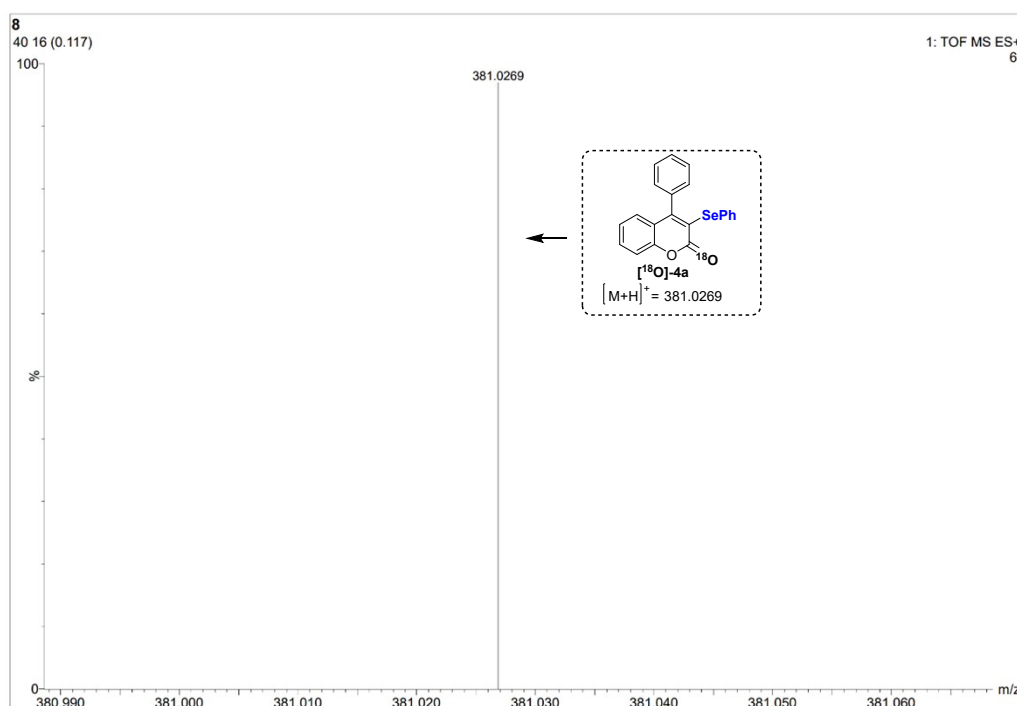

**Figure S6** HRMS analysis of the  $^{18}\text{O}$ -labeled product  $[^{18}\text{O}]\text{-4a}$ .

### 3.1.3 Detection of the possible intermediates

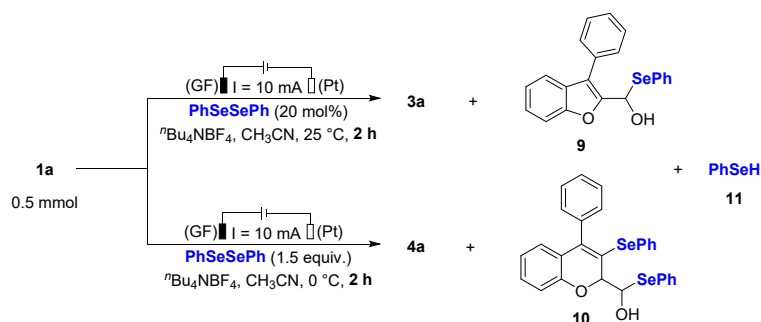

In an undivided three-necked flask (25 mL), 1,2-diphenyldiselenane (**2a**, 31.2 mg, 0.1 mmol or



234.1 mg, 0.75 mmol),  $n\text{Bu}_4\text{NBF}_4$  (164.6 mg, 0.5 mmol),  $\text{CH}_3\text{CN}$  (10 mL) and (3-phenoxyprop-1-yn-1-yl)benzene (**1a**, 104.0 mg, 94.5  $\mu\text{L}$ , 0.5 mmol) were continuously added. The flask was equipped with a graphite felt electrode (10 mm  $\times$  30 mm) as the anode and a platinum plate electrode (10 mm  $\times$  10 mm) as the cathode. The reaction mixture was stirred and electrolyzed at a constant current (10 mA) under air at 25  $^\circ\text{C}$  or at 0  $^\circ\text{C}$  for 2 h. The reaction mixture was analyzed by HRMS (Fig. S7-S9)

**9**, HRMS (ESI-TOF)  $m/z$   $[\text{M}+\text{H}]^+$  calcd for  $\text{C}_{21}\text{H}_{17}\text{O}_2\text{Se}^+$ , 381.0389; found 381.0385.

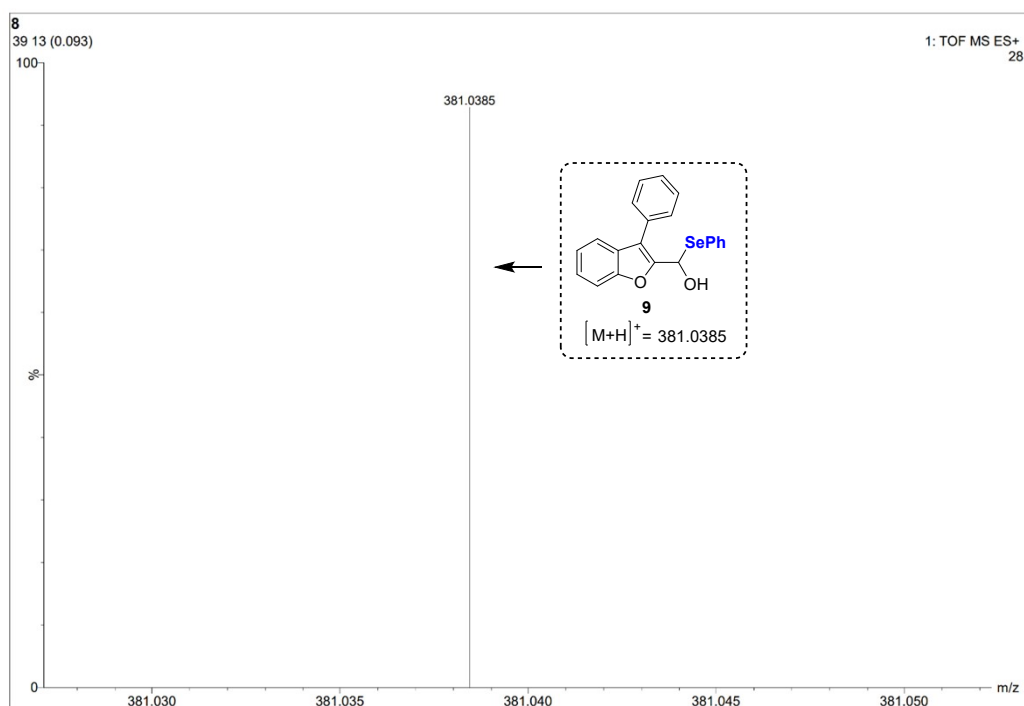

**Figure S7** HRMS analysis of the possible intermediate **9**.

**10**, HRMS (ESI-TOF)  $m/z$   $[\text{M}+\text{H}]^+$  calcd for  $\text{C}_{28}\text{H}_{23}\text{O}_2\text{Se}_2^+$ , 551.0023; found 551.0020.

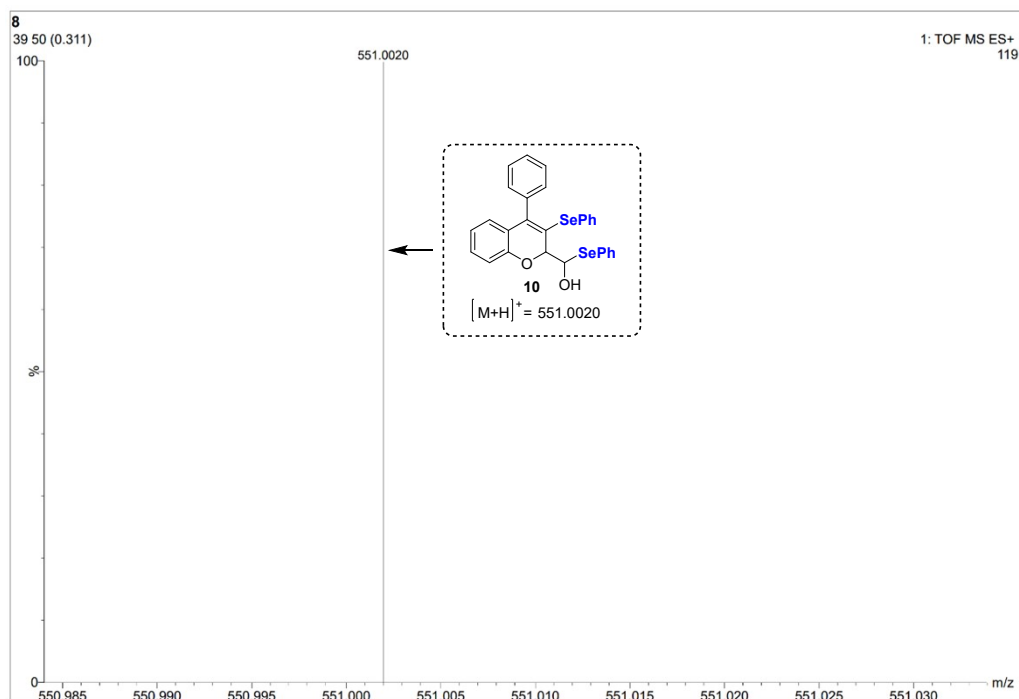

**Figure S8** HRMS analysis of the possible intermediate **10**.

**11**, HRMS (ESI-TOF)  $m/z$   $[M+H]^+$  calcd for  $C_6H_7Se^+$ , 158.9708; found 158.9707.

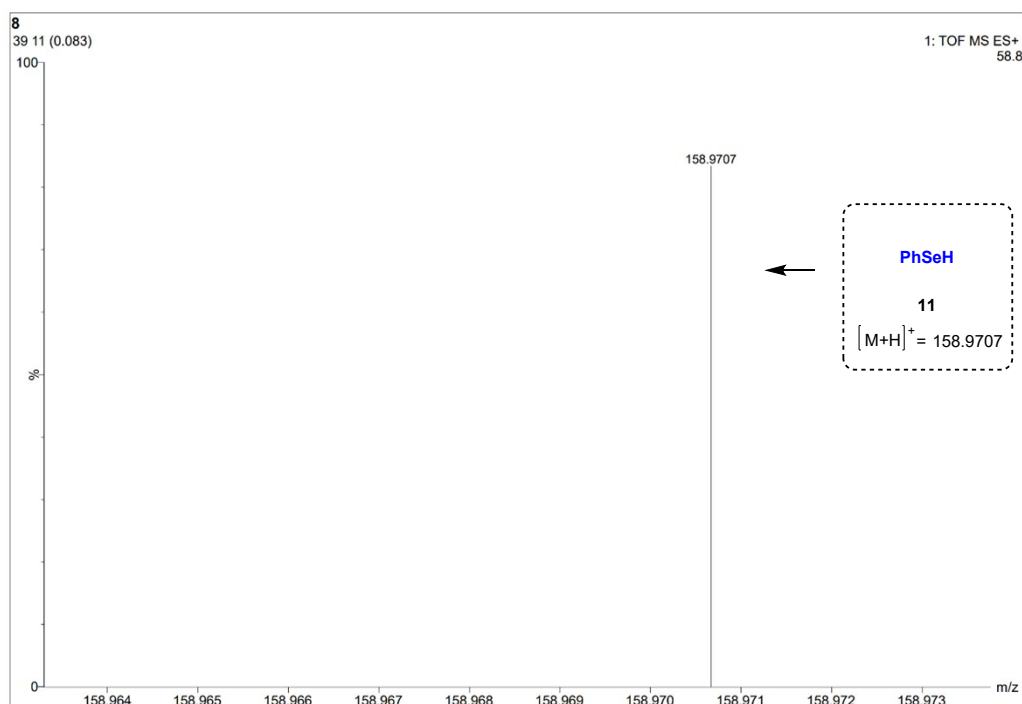

**Figure S9** HRMS analysis of the possible intermediate **11**.

### 3.2 Cyclic voltammetry analysis

Cyclic voltammetry was performed in a three electrodes cell in a three-necked flask at room temperature. The working electrode was a 3 mm diameter glassy carbon disc electrode, and the

counter electrode was a Pt wire. The reference was silver/silver chloride electrode (Ag/AgCl) submerged in saturated aqueous KCl solution. As shown in the Figure S10, **1a** gave an oxidation peak at 1.35 V vs. Ag/AgCl in the range of 0–2.0 V, and **2a** gave an oxidation peak at 1.40 V vs. Ag/AgCl in the range of 0–2.0 V (Fig. S10).

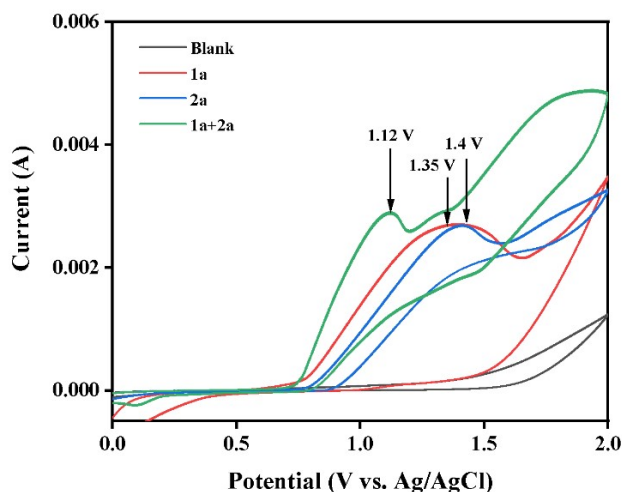

**Figure S10** CV scans (scan rate 100 mV s<sup>-1</sup>) of substrates: Blank (*n*Bu<sub>4</sub>NBF<sub>4</sub>, 0.02 M in 10 mL CH<sub>3</sub>CN, black curve); (3-phenoxyprop-1-yn-1-yl)benzene (**1a**, 0.05 M in CH<sub>3</sub>CN, red curve); diphenyl diselenide (**2a**, 0.05 M in CH<sub>3</sub>CN, blue curve); **1a** and **2a** (0.05 M in CH<sub>3</sub>CN, green curve).

#### 4 Experimental data for the products 3, 4, 5 and 6

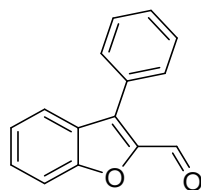

**3-Phenylbenzofuran-2-carbaldehyde (3a)**.<sup>1</sup> The product was purified by silica gel column chromatography with petroleum ether/ethyl acetate (50:1, v/v). Yellow solid (97.7 mg, 88%), mp 62–64 °C. <sup>1</sup>H NMR (400 MHz, CDCl<sub>3</sub>) δ (ppm) 9.83 (s, 1H), 7.73 (d, *J* = 8.0 Hz, 1H), 7.60 (d, *J* = 8.0 Hz, 3H), 7.52 (t, *J* = 7.7 Hz, 4H), 7.33 (t, *J* = 7.5 Hz, 1H). <sup>13</sup>C NMR (100 MHz, CDCl<sub>3</sub>) δ (ppm) 179.8, 155.4, 147.6, 134.2, 130.0, 129.7, 129.4, 129.20, 129.16, 127.0, 124.3, 122.7, 112.8.

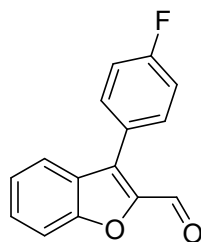

**3-(4-Fluorophenyl)benzofuran-2-carbaldehyde (3b).** The product was purified by silica gel column chromatography with petroleum ether/ethyl acetate (50:1, v/v). Yellow solid (99.6 mg, 83%), mp 147–149 °C.  $^1\text{H}$  NMR (400 MHz,  $\text{CDCl}_3$ )  $\delta$  (ppm) 9.88 (s, 1H), 7.76 (dt,  $J = 8.0, 1.0$  Hz, 1H), 7.69–7.58 (m, 4H), 7.43–7.39 (m, 1H), 7.32–7.28 (m, 2H).  $^{13}\text{C}$  NMR (100 MHz,  $\text{CDCl}_3$ )  $\delta$  (ppm) 179.7, 163.5 (d,  $J = 250.2$  Hz), 155.4, 147.6, 133.0, 131.8 (d,  $J = 8.4$  Hz), 129.9, 127.0, 125.2 (d,  $J = 3.4$  Hz), 124.4, 122.4, 116.4 (d,  $J = 21.9$  Hz), 112.9. HRMS (ESI)  $m/z$ :  $[\text{M} + \text{H}]^+$  Calcd for  $\text{C}_{15}\text{H}_{10}\text{FO}_2^+$  241.0660; Found 241.0663.

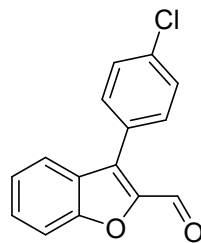

**3-(4-Chlorophenyl)benzofuran-2-carbaldehyde (3c).** The product was purified by silica gel column chromatography with petroleum ether/ethyl acetate (50:1, v/v). Yellow solid (107.6 mg, 84%), mp 163–165 °C.  $^1\text{H}$  NMR (400 MHz,  $\text{CDCl}_3$ )  $\delta$  (ppm) 9.89 (s, 1H), 7.76 (dt,  $J = 8.0, 1.0$  Hz, 1H), 7.69 (d,  $J = 8.4$  Hz, 1H), 7.63–7.57 (m, 5H), 7.44–7.40 (m, 1H).  $^{13}\text{C}$  NMR (100 MHz,  $\text{CDCl}_3$ )  $\delta$  (ppm) 179.6, 155.5, 147.6, 135.8, 132.8, 131.2, 129.9, 129.5, 127.7, 126.9, 124.5, 122.4, 113.0. HRMS (ESI)  $m/z$ :  $[\text{M} + \text{H}]^+$  Calcd for  $\text{C}_{15}\text{H}_{10}\text{ClO}_2^+$  257.0364; Found 257.0363.

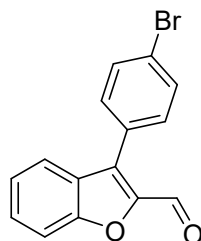

**3-(4-Bromophenyl)benzofuran-2-carbaldehyde (3d).** The product was purified by silica gel column chromatography with petroleum ether/ethyl acetate (50:1, v/v). Yellow solid (129.0 mg, 86%), mp 163–165 °C.  $^1\text{H}$  NMR (400 MHz,  $\text{CDCl}_3$ )  $\delta$  (ppm) 9.89 (s, 1H), 7.76–7.72 (m, 3H), 7.68 (d,  $J = 8.4$  Hz, 1H), 7.63–7.59 (m, 1H), 7.56–7.52 (m, 2H), 7.43–7.39 (m, 1H).  $^{13}\text{C}$  NMR (100 MHz,  $\text{CDCl}_3$ )  $\delta$  (ppm) 179.6, 155.5, 147.6, 132.7, 132.5, 131.4, 129.9, 128.2, 126.8, 124.5,

123.95, 122.4, 113.0. HRMS (ESI)  $m/z$ :  $[M + H]^+$  Calcd for  $C_{15}H_{10}BrO_2^+$  300.9859; Found 300.9861.

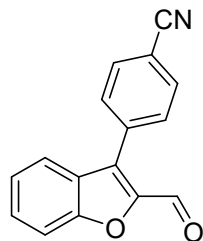

**4-(2-Formylbenzofuran-3-yl)benzonitrile (3e).** The product was purified by silica gel column chromatography with petroleum ether/ethyl acetate (10:1, v/v). Yellow solid (107.5 mg, 87%), mp 176–178 °C.  $^1H$  NMR (400 MHz,  $CDCl_3$ )  $\delta$  (ppm) 9.92 (s, 1H), 7.90 (d,  $J = 8.2$  Hz, 2H), 7.80 (d,  $J = 8.3$  Hz, 2H), 7.74 (d,  $J = 8.0$  Hz, 1H), 7.71 (d,  $J = 8.4$  Hz, 1H), 7.66–7.62 (m, 1H), 7.44 (t,  $J = 7.5$  Hz, 1H).  $^{13}C$  NMR (100 MHz,  $CDCl_3$ )  $\delta$  (ppm) 179.5, 155.4, 147.7, 134.1, 132.9, 131.1, 130.6, 130.1, 126.5, 124.9, 122.1, 118.3, 113.2, 113.1. HRMS (ESI)  $m/z$ :  $[M + H]^+$  Calcd for  $C_{16}H_{10}NO_2^+$  248.0707; Found 248.0705.

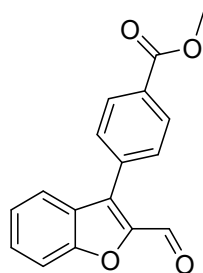

**Methyl 4-(2-formylbenzofuran-3-yl)benzoate (3f).** The product was purified by silica gel column chromatography with petroleum ether/ethyl acetate (10:1, v/v). Yellow solid (119.1 mg, 85%), mp 120–122 °C.  $^1H$  NMR (400 MHz,  $CDCl_3$ )  $\delta$  (ppm) 9.88 (s, 1H), 8.25–8.22 (m, 2H), 7.76–7.71 (m, 3H), 7.66 (d,  $J = 8.4$  Hz, 1H), 7.61–7.57 (m, 1H), 7.42–7.38 (m, 1H), 3.99 (s, 3H).  $^{13}C$  NMR (100 MHz,  $CDCl_3$ )  $\delta$  (ppm) 179.6, 166.4, 155.4, 147.7, 133.8, 132.7, 130.9, 130.3, 130.0, 129.9, 126.7, 124.6, 122.4, 113.0, 52.5. HRMS (ESI)  $m/z$ :  $[M + H]^+$  Calcd for  $C_{17}H_{13}O_4^+$  281.0809; Found 281.0807.

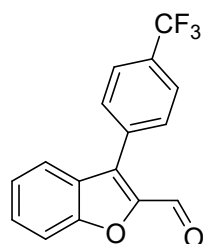

**3-(4-(Trifluoromethyl)phenyl)benzofuran-2-carbaldehyde (3g).** The product was purified by

silica gel column chromatography with petroleum ether/ethyl acetate (20:1, v/v). Yellow solid (118.9 mg, 82%), mp 103–105 °C. <sup>1</sup>H NMR (400 MHz, CDCl<sub>3</sub>) δ (ppm) 9.91 (s, 1H), 7.87 (d, *J* = 8.2 Hz, 2H), 7.81–7.75 (m, 3H), 7.70 (dt, *J* = 8.4, 1.0 Hz, 1H), 7.65–7.61 (m, 1H), 7.45–7.41 (m, 1H). <sup>13</sup>C NMR (100 MHz, CDCl<sub>3</sub>) δ (ppm) 179.5, 155.4, 147.8, 133.0, 132.1, 131.4 (q, *J* = 32.9 Hz), 130.4, 130.0, 126.8, 126.2 (q, *J* = 3.8 Hz), 124.7, 123.9 (q, *J* = 272.5 Hz), 122.3, 113.0. HRMS (ESI) *m/z*: [M + H]<sup>+</sup> Calcd for C<sub>16</sub>H<sub>10</sub>F<sub>3</sub>O<sub>2</sub><sup>+</sup> 291.0628; Found 291.0626.

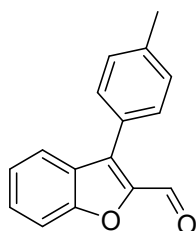

**3-(*P*-Tolyl)benzofuran-2-carbaldehyde (3h).** The product was purified by silica gel column chromatography with petroleum ether/ethyl acetate (50:1, v/v). Yellow solid (100.4 mg, 85%), mp 94–96 °C. <sup>1</sup>H NMR (400 MHz, CDCl<sub>3</sub>) δ (ppm) 9.88 (s, 1H), 7.79 (d, *J* = 8.0 Hz, 1H), 7.65 (d, *J* = 8.4 Hz, 1H), 7.58 (d, *J* = 7.4 Hz, 1H), 7.54 (d, *J* = 7.8 Hz, 2H), 7.39 (d, *J* = 7.7 Hz, 3H), 2.48 (s, 3H). <sup>13</sup>C NMR (100 MHz, CDCl<sub>3</sub>) δ (ppm) 180.0, 155.5, 147.6, 139.7, 134.6, 130.0, 129.9, 129.7, 127.1, 126.2, 124.2, 122.8, 112.8, 21.4. HRMS (ESI) *m/z*: [M + H]<sup>+</sup> Calcd for C<sub>16</sub>H<sub>13</sub>O<sub>2</sub><sup>+</sup> 237.0911; Found 237.0918.

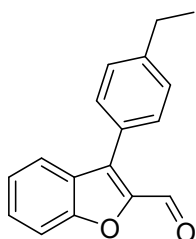

**3-(4-Ethylphenyl)benzofuran-2-carbaldehyde (3i).** The product was purified by silica gel column chromatography with petroleum ether/ethyl acetate (50:1, v/v). Yellow solid (101.3 mg, 81%), mp 87–89 °C. <sup>1</sup>H NMR (400 MHz, CDCl<sub>3</sub>) δ (ppm) 9.89 (s, 1H), 7.80 (dd, *J* = 8.1, 1.2 Hz, 1H), 7.66 (d, *J* = 8.4 Hz, 1H), 7.58 (dd, *J* = 7.5, 5.2 Hz, 3H), 7.47–7.34 (m, 3H), 2.79 (q, *J* = 7.6 Hz, 2H), 1.34 (t, *J* = 7.6 Hz, 3H). <sup>13</sup>C NMR (100 MHz, CDCl<sub>3</sub>) δ (ppm) 180.0, 155.5, 147.6, 145.9, 134.6, 130.0, 129.7, 128.8, 127.1, 126.5, 124.2, 122.8, 112.8, 28.8, 15.5. HRMS (ESI) *m/z*: [M + H]<sup>+</sup> Calcd for C<sub>17</sub>H<sub>15</sub>O<sub>2</sub><sup>+</sup> 251.1067; Found 251.1069.

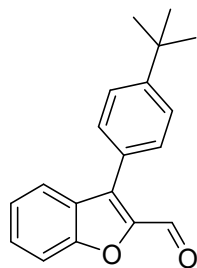

**3-(4-(*Tert*-Butyl)phenyl)benzofuran-2-carbaldehyde (3j).** The product was purified by silica gel column chromatography with petroleum ether/ethyl acetate (50:1, v/v). Yellow solid (111.3 mg, 80%), mp 103–105 °C.  $^1\text{H}$  NMR (400 MHz,  $\text{CDCl}_3$ )  $\delta$  (ppm) 9.90 (s, 1H), 7.81 (d,  $J = 7.9$  Hz, 1H), 7.67–7.56 (m, 6H), 7.37 (t,  $J = 7.5$  Hz, 1H), 1.42 (s, 9H).  $^{13}\text{C}$  NMR (100 MHz,  $\text{CDCl}_3$ )  $\delta$  (ppm) 180.0, 155.5, 152.8, 147.6, 134.5, 129.8, 129.7, 127.1, 126.3, 126.2, 124.2, 122.9, 112.8, 34.9, 31.3. HRMS (ESI)  $m/z$ :  $[\text{M} + \text{H}]^+$  Calcd for  $\text{C}_{19}\text{H}_{19}\text{O}_2^+$  279.1380; Found 279.1388.

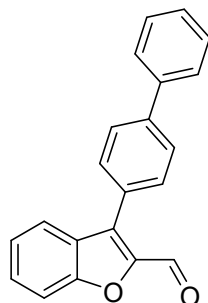

**3-([1,1'-Biphenyl]-4-yl)benzofuran-2-carbaldehyde (3k).** The product was purified by silica gel column chromatography with petroleum ether/ethyl acetate (30:1, v/v). Yellow solid (125.2 mg, 84%), mp 176–178 °C.  $^1\text{H}$  NMR (400 MHz,  $\text{CDCl}_3$ )  $\delta$  (ppm) 9.97 (s, 1H), 7.87–7.82 (m, 3H), 7.76–7.69 (m, 5H), 7.64–7.60 (m, 1H), 7.53 (t,  $J = 7.6$  Hz, 2H), 7.47–7.40 (m, 2H).  $^{13}\text{C}$  NMR (100 MHz,  $\text{CDCl}_3$ )  $\delta$  (ppm) 179.9, 155.5, 147.7, 142.4, 140.1, 133.9, 130.5, 129.8, 129.0, 128.1, 128.0, 127.9, 127.2, 127.1, 124.4, 122.7, 112.9. HRMS (ESI)  $m/z$ :  $[\text{M} + \text{H}]^+$  Calcd for  $\text{C}_{21}\text{H}_{15}\text{O}_2^+$  299.1067; Found 299.1076.

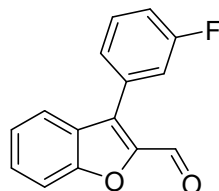

**3-(3-Fluorophenyl)benzofuran-2-carbaldehyde (3l).** The product was purified by silica gel column chromatography with petroleum ether/ethyl acetate (50:1, v/v). Yellow solid (79.2 mg, 66%), mp 80–82 °C.  $^1\text{H}$  NMR (400 MHz,  $\text{CDCl}_3$ )  $\delta$  (ppm) 9.92 (s, 1H), 7.78 (d,  $J = 8.0$  Hz, 1H),

7.68 (d,  $J = 8.4$  Hz, 1H), 7.63–7.55 (m, 2H), 7.45–7.36 (m, 3H), 7.29–7.24 (m, 1H).  $^{13}\text{C}$  NMR (100 MHz,  $\text{CDCl}_3$ )  $\delta$  (ppm) 179.6, 163.0 (d,  $J = 248.1$  Hz), 155.4, 147.7, 132.6, 131.3 (d,  $J = 8.3$  Hz), 130.9 (d,  $J = 8.5$  Hz), 129.9, 126.8, 125.9 (d,  $J = 3.1$  Hz), 124.5, 122.4, 116.9 (d,  $J = 22.4$  Hz), 116.5 (d,  $J = 21.1$  Hz), 113.0. HRMS (ESI)  $m/z$ :  $[\text{M} + \text{H}]^+$  Calcd for  $\text{C}_{15}\text{H}_{10}\text{FO}_2^+$  241.0660; Found 241.0666.

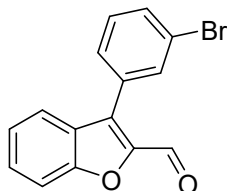

**3-(3-Bromophenyl)benzofuran-2-carbaldehyde (3m).** The product was purified by silica gel column chromatography with petroleum ether/ethyl acetate (50:1, v/v). Yellow solid (97.5 mg, 65%), mp 136–138 °C.  $^1\text{H}$  NMR (400 MHz,  $\text{CDCl}_3$ )  $\delta$  (ppm) 9.89 (s, 1H), 7.80 (t,  $J = 1.8$  Hz, 1H), 7.76 (d,  $J = 8.0$  Hz, 1H), 7.70–7.66 (m, 2H), 7.62–7.57 (m, 2H), 7.47 (t,  $J = 7.8$  Hz, 1H), 7.43–7.39 (m, 1H).  $^{13}\text{C}$  NMR (100 MHz,  $\text{CDCl}_3$ )  $\delta$  (ppm) 179.5, 155.4, 147.7, 132.7, 132.5, 132.3, 131.3, 130.7, 130.0, 128.7, 126.7, 124.6, 123.3, 122.4, 113.0. HRMS (ESI)  $m/z$ :  $[\text{M} + \text{H}]^+$  Calcd for  $\text{C}_{15}\text{H}_{10}\text{BrO}_2^+$  300.9859; Found 300.9867.

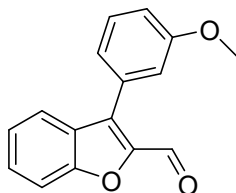

**3-(3-Methoxyphenyl)benzofuran-2-carbaldehyde (3n).** The product was purified by silica gel column chromatography with petroleum ether/ethyl acetate (50:1, v/v). Yellow solid (73.1 mg, 58%), mp 89–91 °C.  $^1\text{H}$  NMR (400 MHz,  $\text{CDCl}_3$ )  $\delta$  (ppm) 9.92 (s, 1H), 7.81 (d,  $J = 8.0$  Hz, 1H), 7.67 (d,  $J = 8.4$  Hz, 1H), 7.59 (t,  $J = 7.7$  Hz, 1H), 7.50 (t,  $J = 7.9$  Hz, 1H), 7.39 (t,  $J = 7.5$  Hz, 1H), 7.23 (d,  $J = 7.6$  Hz, 1H), 7.18 (s, 1H), 7.10 (dd,  $J = 8.4, 2.6$  Hz, 1H).  $^{13}\text{C}$  NMR (100 MHz,  $\text{CDCl}_3$ )  $\delta$  (ppm) 179.9, 160.1, 155.4, 147.7, 134.3, 130.4, 130.3, 129.8, 127.0, 124.3, 122.8, 122.5, 115.6, 114.9, 112.9, 55.5. HRMS (ESI)  $m/z$ :  $[\text{M} + \text{H}]^+$  Calcd for  $\text{C}_{16}\text{H}_{13}\text{O}_3^+$  253.0860; Found 253.0864.

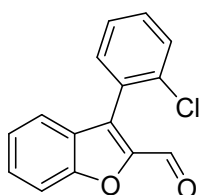

**3-(2-Chlorophenyl)benzofuran-2-carbaldehyde (3o).** The product was purified by silica gel



column chromatography with petroleum ether/ethyl acetate (50:1, v/v). Yellow solid (79.4 mg, 62%), mp 89–91 °C. <sup>1</sup>H NMR (400 MHz, CDCl<sub>3</sub>) δ (ppm) 9.76 (s, 1H), 7.69–7.67 (m, 1H), 7.65–7.62 (m, 1H), 7.58 (td, *J* = 7.2, 1.4 Hz, 2H), 7.52–7.45 (m, 3H), 7.39–7.35 (m, 1H). <sup>13</sup>C NMR (100 MHz, CDCl<sub>3</sub>) δ (ppm) 179.6, 155.3, 148.0, 134.0, 132.5, 130.9, 130.8, 130.5, 129.6, 128.3, 127.3, 127.1, 124.2, 123.1, 112.9. HRMS (ESI) *m/z*: [M + H]<sup>+</sup> Calcd for C<sub>15</sub>H<sub>10</sub>ClO<sub>2</sub><sup>+</sup> 257.0364; Found 257.0372.

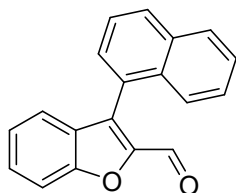

**3-(Naphthalen-1-yl)benzofuran-2-carbaldehyde (3p).** The product was purified by silica gel column chromatography with petroleum ether/ethyl acetate (50:1, v/v). Yellow solid (114.3 mg, 84%), mp 142–144 °C. <sup>1</sup>H NMR (400 MHz, CDCl<sub>3</sub>) δ (ppm) 9.71 (s, 1H), 8.07–8.05 (m, 1H), 8.01 (d, *J* = 8.3 Hz, 1H), 7.79 (d, *J* = 8.4 Hz, 1H), 7.74 (d, *J* = 8.4 Hz, 1H), 7.64–7.57 (m, 4H), 7.49–7.43 (m, 2H), 7.32–7.28 (m, 1H). <sup>13</sup>C NMR (100 MHz, CDCl<sub>3</sub>) δ (ppm) 179.7, 155.3, 148.8, 133.8, 133.2, 132.1, 130.1, 129.8, 129.4, 128.7, 128.3, 127.0, 126.7, 126.4, 125.6, 125.4, 124.3, 123.3, 112.9. HRMS (ESI) *m/z*: [M + H]<sup>+</sup> Calcd for C<sub>19</sub>H<sub>13</sub>O<sub>2</sub><sup>+</sup> 273.0911; Found 273.0911.

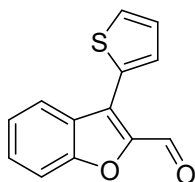

**3-(Thiophen-2-yl)benzofuran-2-carbaldehyde (3q).** The product was purified by silica gel column chromatography with petroleum ether/ethyl acetate (30:1, v/v). Yellow solid (78.7 mg, 69%), mp 98–100 °C. <sup>1</sup>H NMR (400 MHz, CDCl<sub>3</sub>) δ (ppm) 10.12 (s, 1H), 7.99 (d, *J* = 8.0 Hz, 1H), 7.66 (d, *J* = 8.4 Hz, 1H), 7.63–7.58 (m, 2H), 7.55 (dd, *J* = 3.6, 1.2 Hz, 1H), 7.43 (t, *J* = 7.5 Hz, 1H), 7.29 (dd, *J* = 4.8, 3.2 Hz, 1H). <sup>13</sup>C NMR (100 MHz, CDCl<sub>3</sub>) δ (ppm) 179.6, 155.5, 147.6, 129.9, 129.8, 129.6, 128.6, 128.3, 126.9, 126.6, 124.5, 123.0, 112.9. HRMS (ESI) *m/z*: [M + H]<sup>+</sup> Calcd for C<sub>13</sub>H<sub>9</sub>O<sub>2</sub>S<sup>+</sup> 229.0318; Found 229.0315.

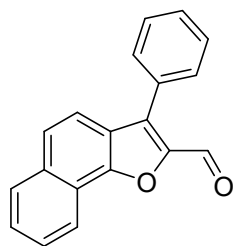

**3-Phenyl-naphtho[1,2-*b*]furan-2-carbaldehyde (3r).** The product was purified by silica gel column chromatography with petroleum ether/ethyl acetate (50:1, v/v). Yellow solid (111.6 mg, 82%), mp 134–136 °C. <sup>1</sup>H NMR (400 MHz, CDCl<sub>3</sub>) δ (ppm) 9.89 (s, 1H), 8.52 (dd, *J* = 7.6, 2.0 Hz, 1H), 7.95 (dd, *J* = 7.4, 1.9 Hz, 1H), 7.73–7.56 (m, 9H). <sup>13</sup>C NMR (100 MHz, CDCl<sub>3</sub>) δ (ppm) 179.0, 152.6, 147.6, 135.4, 134.1, 130.1, 129.4, 129.4, 129.2, 128.5, 127.8, 127.2, 125.4, 122.8, 121.5, 121.3, 118.9. HRMS (ESI) *m/z*: [M + H]<sup>+</sup> Calcd for C<sub>19</sub>H<sub>13</sub>O<sub>2</sub><sup>+</sup> 273.0911; Found 273.0903.

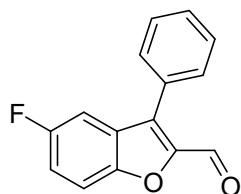

**5-Fluoro-3-phenylbenzofuran-2-carbaldehyde (3s).** The product was purified by silica gel column chromatography with petroleum ether/ethyl acetate (50:1, v/v). Yellow solid (88.8 mg, 74%), mp 110–112 °C. <sup>1</sup>H NMR (400 MHz, CDCl<sub>3</sub>) δ (ppm) 9.87 (s, 1H), 7.62–7.55 (m, 6H), 7.40 (dd, *J* = 8.1, 2.7 Hz, 1H), 7.29 (td, *J* = 8.9, 2.7 Hz, 1H). <sup>13</sup>C NMR (100 MHz, CDCl<sub>3</sub>) δ (ppm) 179.8, 159.8 (d, *J* = 242.1 Hz), 151.6, 148.9, 134.0 (d, *J* = 4.7 Hz), 129.8, 129.7, 129.3, 128.7, 127.8 (d, *J* = 10.3 Hz), 118.1 (d, *J* = 26.9 Hz), 113.9 (d, *J* = 9.4 Hz), 107.7 (d, *J* = 25.1 Hz). HRMS (ESI) *m/z*: [M + H]<sup>+</sup> Calcd for C<sub>15</sub>H<sub>10</sub>FO<sub>2</sub><sup>+</sup> 241.0660; Found 241.0657.

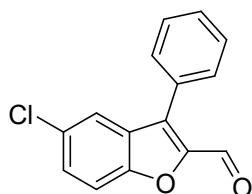

**5-Chloro-3-phenylbenzofuran-2-carbaldehyde (3t).**<sup>2</sup> The product was purified by silica gel column chromatography with petroleum ether/ethyl acetate (50:1, v/v). Yellow solid (103.7 mg, 81%), mp 142–144 °C. <sup>1</sup>H NMR (400 MHz, CDCl<sub>3</sub>) δ (ppm) 9.88 (s, 1H), 7.74 (d, *J* = 2.1 Hz, 1H), 7.63–7.56 (m, 6H), 7.52 (dd, *J* = 8.9, 2.1 Hz, 1H). <sup>13</sup>C NMR (100 MHz, CDCl<sub>3</sub>) δ (ppm) 179.7, 153.7, 148.5, 133.3, 130.1, 130.0, 129.9, 129.7, 129.4, 128.5, 128.4, 122.1, 114.0.

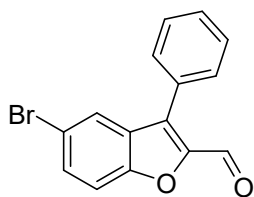

**5-Bromo-3-phenylbenzofuran-2-carbaldehyde (3u).**<sup>2</sup> The product was purified by silica gel column chromatography with petroleum ether/ethyl acetate (50:1, v/v). Yellow solid (117.0 mg, 78%), mp 143–145 °C. <sup>1</sup>H NMR (400 MHz, CDCl<sub>3</sub>) δ (ppm) 9.87 (s, 1H), 7.88 (d, *J* = 2.0 Hz, 1H), 7.65–7.56 (m, 6H), 7.52 (d, *J* = 8.8 Hz, 1H). <sup>13</sup>C NMR (100 MHz, CDCl<sub>3</sub>) δ (ppm) 179.7, 154.0, 148.3, 133.1, 132.6, 129.9, 129.7, 129.4, 128.9, 128.5, 125.2, 117.5, 114.4.

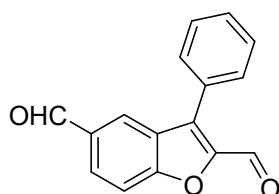

**3-Phenylbenzofuran-2,5-dicarbaldehyde (3v).** The product was purified by silica gel column chromatography with petroleum ether/ethyl acetate (5:1, v/v). Yellow solid (91.3 mg, 73%), mp 186–188 °C. <sup>1</sup>H NMR (400 MHz, CDCl<sub>3</sub>) δ (ppm) 10.12 (s, 1H), 9.95 (s, 1H), 8.36 (d, *J* = 1.6 Hz, 1H), 8.15 (dd, *J* = 8.7, 1.7 Hz, 1H), 7.81 (d, *J* = 8.6 Hz, 1H), 7.70–7.62 (m, 5H). <sup>13</sup>C NMR (100 MHz, CDCl<sub>3</sub>) δ (ppm) 190.9, 179.6, 158.4, 148.8, 134.2, 133.4, 130.3, 129.98, 129.95, 129.5, 128.3, 127.8, 126.3, 113.8. HRMS (ESI) *m/z*: [M + H]<sup>+</sup> Calcd for C<sub>16</sub>H<sub>11</sub>O<sub>2</sub><sup>+</sup> 251.0703; Found 251.0702.

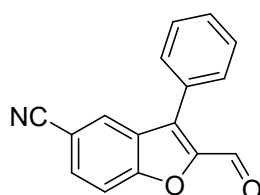

**2-Formyl-3-phenylbenzofuran-5-carbonitrile (3w).** The product was purified by silica gel column chromatography with petroleum ether/ethyl acetate (10:1, v/v). Yellow solid (105.0 mg, 85%), mp 200–202 °C. <sup>1</sup>H NMR (400 MHz, CDCl<sub>3</sub>) δ (ppm) 9.96 (s, 1H), 8.17 (d, *J* = 1.4 Hz, 1H), 7.85 (dd, *J* = 8.7, 1.6 Hz, 1H), 7.78 (dd, *J* = 8.7, 0.7 Hz, 1H), 7.65–7.62 (m, 5H). <sup>13</sup>C NMR (100 MHz, CDCl<sub>3</sub>) δ (ppm) 179.5, 156.7, 148.8, 133.1, 132.4, 130.2, 129.9, 129.6, 128.2, 127.9, 127.8, 118.4, 114.3, 108.6. HRMS (ESI) *m/z*: [M + H]<sup>+</sup> Calcd for C<sub>16</sub>H<sub>10</sub>NO<sub>2</sub><sup>+</sup> 248.0707; Found 248.0704.

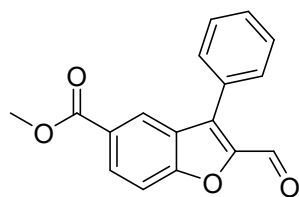

**Methyl 2-formyl-3-phenylbenzofuran-5-carboxylate (3x).** The product was purified by silica gel column chromatography with petroleum ether/ethyl acetate (10:1, v/v). Yellow solid (116.3 mg, 83%), mp 156–158 °C.  $^1\text{H}$  NMR (400 MHz,  $\text{CDCl}_3$ )  $\delta$  (ppm) 9.92 (s, 1H), 8.52 (d,  $J = 1.8$  Hz, 1H), 8.28 (dd,  $J = 8.8, 1.8$  Hz, 1H), 7.71–7.59 (m, 6H), 3.97 (s, 3H).  $^{13}\text{C}$  NMR (100 MHz,  $\text{CDCl}_3$ )  $\delta$  (ppm) 179.7, 166.4, 157.7, 148.6, 134.3, 130.9, 130.0, 129.8, 129.4, 128.5, 127.2, 126.8, 125.4, 112.8, 52.4. HRMS (ESI)  $m/z$ :  $[\text{M} + \text{H}]^+$  Calcd for  $\text{C}_{17}\text{H}_{13}\text{O}_4^+$  281.0809; Found 281.0812.

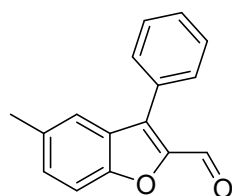

**5-Methyl-3-phenylbenzofuran-2-carbaldehyde (3y).**<sup>2</sup> The product was purified by silica gel column chromatography with petroleum ether/ethyl acetate (50:1, v/v). Yellow solid (88.6 mg, 75%), mp 109–111 °C.  $^1\text{H}$  NMR (400 MHz,  $\text{CDCl}_3$ )  $\delta$  (ppm) 9.87 (s, 1H), 7.66–7.63 (m, 2H), 7.62–7.54 (m, 5H), 7.40 (dd,  $J = 8.8, 1.7$  Hz, 1H), 2.49 (s, 3H).  $^{13}\text{C}$  NMR (100 MHz,  $\text{CDCl}_3$ )  $\delta$  (ppm) 179.8, 154.0, 147.9, 134.2, 134.1, 131.4, 130.0, 129.41, 129.35, 129.2, 127.1, 122.0, 112.4, 21.4.

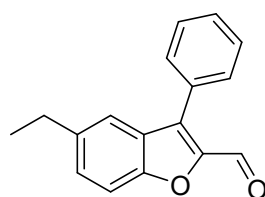

**5-Ethyl-3-phenylbenzofuran-2-carbaldehyde (3z).** The product was purified by silica gel column chromatography with petroleum ether/ethyl acetate (50:1, v/v). Yellow solid (88.8 mg, 71%), mp 100–102 °C.  $^1\text{H}$  NMR (400 MHz,  $\text{CDCl}_3$ )  $\delta$  (ppm) 9.87 (s, 1H), 7.67–7.65 (m, 2H), 7.62–7.56 (m, 5H), 7.44 (dd,  $J = 8.8, 1.6$  Hz, 1H), 2.78 (q,  $J = 7.6$  Hz, 2H), 1.30 (t,  $J = 7.6$  Hz, 3H).  $^{13}\text{C}$  NMR (100 MHz,  $\text{CDCl}_3$ )  $\delta$  (ppm) 179.8, 154.2, 147.9, 140.6, 134.3, 130.4, 130.0, 129.5, 129.4, 129.2, 127.1, 120.8, 112.5, 28.9, 16.1. HRMS (ESI)  $m/z$ :  $[\text{M} + \text{H}]^+$  Calcd for  $\text{C}_{17}\text{H}_{15}\text{O}_2^+$  251.1067; Found 251.1065.

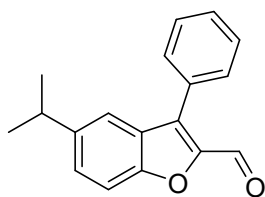

**5-Isopropyl-3-phenylbenzofuran-2-carbaldehyde (3aa).** The product was purified by silica gel column chromatography with petroleum ether/ethyl acetate (50:1, v/v). Yellow oil (104.4 mg, 79%). <sup>1</sup>H NMR (400 MHz, CDCl<sub>3</sub>) δ (ppm) 9.86 (s, 1H), 7.67–7.65 (m, 2H), 7.62–7.55 (m, 5H), 7.48 (dd, *J* = 8.7, 1.8 Hz, 1H), 3.09–3.02 (m, 1H), 1.31 (d, *J* = 7.0 Hz, 6H). <sup>13</sup>C NMR (100 MHz, CDCl<sub>3</sub>) δ (ppm) 179.8, 154.2, 148.0, 145.3, 134.4, 130.0, 129.5, 129.4, 129.2, 129.1, 127.0, 119.3, 112.6, 34.2, 24.4. HRMS (ESI) *m/z*: [M + H]<sup>+</sup> Calcd for C<sub>18</sub>H<sub>17</sub>O<sub>2</sub><sup>+</sup> 265.1224; Found 265.1226.

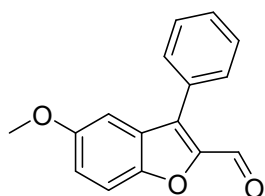

**5-Methoxy-3-phenylbenzofuran-2-carbaldehyde (3ab).** The product was purified by silica gel column chromatography with petroleum ether/ethyl acetate (50:1, v/v). Yellow solid (85.7 mg, 68%), mp 162–164 °C. <sup>1</sup>H NMR (400 MHz, CDCl<sub>3</sub>) δ (ppm) 9.83 (s, 1H), 7.65–7.54 (m, 6H), 7.20 (dd, *J* = 9.1, 2.6 Hz, 1H), 7.12 (d, *J* = 2.6 Hz, 1H), 3.85 (s, 3H). <sup>13</sup>C NMR (100 MHz, CDCl<sub>3</sub>) δ (ppm) 179.7, 157.0, 150.6, 148.4, 134.3, 129.9, 129.4, 129.3, 127.5, 120.1, 114.7, 113.6, 103.0, 56.0. HRMS (ESI) *m/z*: [M + H]<sup>+</sup> Calcd for C<sub>16</sub>H<sub>13</sub>O<sub>3</sub><sup>+</sup> 253.0860; Found 253.0861.

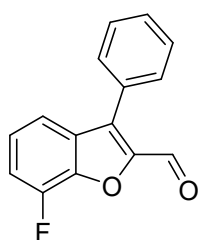

**7-Fluoro-3-phenylbenzofuran-2-carbaldehyde (3ac).** The product was purified by silica gel column chromatography with petroleum ether/ethyl acetate (50:1, v/v). Yellow oil (92.4 mg, 77%). <sup>1</sup>H NMR (400 MHz, CDCl<sub>3</sub>) δ (ppm) 9.92 (s, 1H), 7.66–7.64 (m, 2H), 7.62–7.55 (m, 4H), 7.31 (dd, *J* = 8.4, 3.5 Hz, 2H). <sup>13</sup>C NMR (100 MHz, CDCl<sub>3</sub>) δ (ppm) 179.6, 148.5 (d, *J* = 253.5 Hz), 148.2, 142.9 (d, *J* = 11.9 Hz), 133.9 (d, *J* = 2.5 Hz), 130.6 (d, *J* = 2.8 Hz), 130.0, 129.7, 129.3, 128.7, 124.9 (d, *J* = 5.5 Hz), 118.3 (d, *J* = 4.4 Hz), 115.4 (d, *J* = 15.8 Hz). HRMS (ESI) *m/z*: [M + H]<sup>+</sup> Calcd for C<sub>15</sub>H<sub>10</sub>FO<sub>2</sub><sup>+</sup> 241.0660; Found 241.0665.

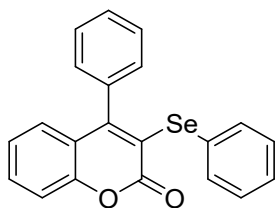

**4-Phenyl-3-(phenylselanyl)-2H-chromen-2-one (4a).**<sup>3</sup> The product was purified by silica gel column chromatography with petroleum ether/ethyl acetate (20:1, v/v). Yellow solid (143.6 mg, 76%), mp 153–155 °C. <sup>1</sup>H NMR (400 MHz, CDCl<sub>3</sub>)  $\delta$  (ppm) 7.57–7.52 (m, 1H), 7.48 (dd,  $J$  = 5.0, 1.9 Hz, 3H), 7.40 (dd,  $J$  = 8.3, 1.2 Hz, 1H), 7.36–7.30 (m, 2H), 7.22–7.15 (m, 6H), 7.09 (dd,  $J$  = 8.0, 1.6 Hz, 1H). <sup>13</sup>C NMR (100 MHz, CDCl<sub>3</sub>)  $\delta$  (ppm) 159.6, 159.1, 153.5, 136.2, 132.8, 132.1, 130.3, 129.1, 128.9, 128.5, 128.3, 127.8, 127.5, 124.3, 120.8, 120.5, 116.8.

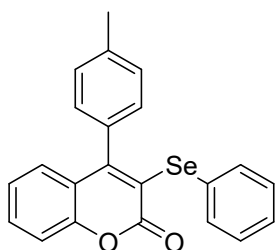

**3-(Phenylselanyl)-4-(p-tolyl)-2H-chromen-2-one (4b).**<sup>3</sup> The product was purified by silica gel column chromatography with petroleum ether/ethyl acetate (20:1, v/v). Yellow solid (143.1 mg, 73%), mp 117–119 °C. <sup>1</sup>H NMR (400 MHz, CDCl<sub>3</sub>)  $\delta$  (ppm) 7.56–7.52 (m, 1H), 7.40–7.34 (m, 3H), 7.29 (d,  $J$  = 7.9 Hz, 2H), 7.22–7.14 (m, 5H), 7.11 (d,  $J$  = 7.9 Hz, 2H), 2.47 (s, 3H). <sup>13</sup>C NMR (100 MHz, CDCl<sub>3</sub>)  $\delta$  (ppm) 159.6, 159.3, 153.5, 138.9, 133.3, 132.7, 132.0, 130.4, 129.2, 129.0, 128.2, 128.1, 127.4, 124.3, 120.60, 120.58, 116.8, 21.5.

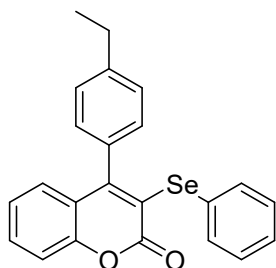

**4-(4-Ethylphenyl)-3-(phenylselanyl)-2H-chromen-2-one (4c).** The product was purified by silica gel column chromatography with petroleum ether/ethyl acetate (20:1, v/v). Yellow solid (150.2 mg, 74%), mp 110–112 °C. <sup>1</sup>H NMR (400 MHz, CDCl<sub>3</sub>)  $\delta$  (ppm) 7.56–7.52 (m, 1H), 7.42–7.38 (m, 1H), 7.34 (dt,  $J$  = 6.5, 1.7 Hz, 2H), 7.30 (d,  $J$  = 8.0 Hz, 2H), 7.21–7.11 (m, 7H),

2.76 (q,  $J = 7.6$  Hz, 2H), 1.34 (t,  $J = 7.6$  Hz, 3H).  $^{13}\text{C}$  NMR (100 MHz,  $\text{CDCl}_3$ )  $\delta$  (ppm) 159.6, 159.2, 153.5, 145.1, 133.5, 132.7, 131.9, 130.4, 129.0, 128.3, 128.1, 127.9, 127.4, 124.2, 120.7, 120.6, 116.8, 28.8, 15.4. HRMS (ESI)  $m/z$ :  $[\text{M} + \text{H}]^+$  Calcd for  $\text{C}_{23}\text{H}_{19}\text{O}_2\text{Se}^+$  407.0545; Found 407.0550.

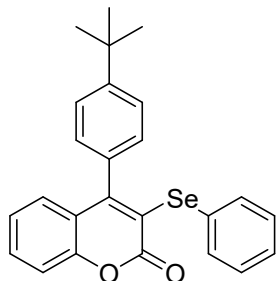

**4-(4-(*Tert*-Butyl)phenyl)-3-(phenylselanyl)-2*H*-chromen-2-one (4d).**<sup>4</sup> The product was purified by silica gel column chromatography with petroleum ether/ethyl acetate (20:1, v/v). Yellow solid (154.1 mg, 71%), mp 156–158 °C.  $^1\text{H}$  NMR (400 MHz,  $\text{CDCl}_3$ )  $\delta$  (ppm) 7.56–7.51 (m, 1H), 7.45 (d,  $J = 8.4$  Hz, 2H), 7.40 (d,  $J = 8.9$  Hz, 1H), 7.31–7.28 (m, 2H), 7.21–7.10 (m, 7H), 1.41 (s, 9H).  $^{13}\text{C}$  NMR (100 MHz,  $\text{CDCl}_3$ )  $\delta$  (ppm) 159.7, 158.9, 153.4, 151.9, 133.1, 132.8, 131.9, 130.5, 129.0, 128.1, 128.0, 127.3, 125.3, 124.2, 120.9, 120.7, 116.8, 34.8, 31.4.

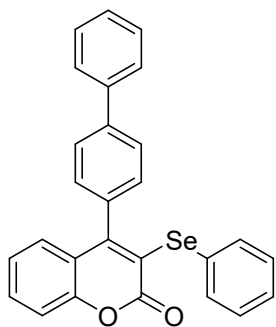

**4-([1,1'-biphenyl]-4-yl)-3-(phenylselanyl)-2*H*-chromen-2-one (4e).**<sup>4</sup> The product was purified by silica gel column chromatography with petroleum ether/ethyl acetate (20:1, v/v). Yellow solid (172.5 mg, 76%), mp 131–133 °C.  $^1\text{H}$  NMR (400 MHz,  $\text{CDCl}_3$ )  $\delta$  (ppm) 7.70–7.65 (m, 4H), 7.58–7.51 (m, 3H), 7.46–7.42 (m, 2H), 7.35–7.33 (m, 2H), 7.27–7.24 (m, 2H), 7.22–7.13 (m, 5H).  $^{13}\text{C}$  NMR (100 MHz,  $\text{CDCl}_3$ )  $\delta$  (ppm) 159.7, 158.4, 153.4, 141.6, 140.3, 134.9, 133.1, 132.0, 130.3, 129.1, 129.0, 128.9, 127.84, 127.83, 127.5, 127.2, 127.1, 124.4, 121.1, 120.5, 116.9.

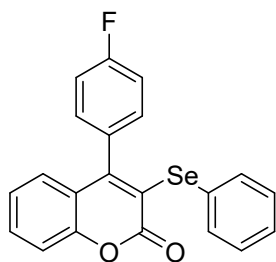

**4-(4-Fluorophenyl)-3-(phenylselanyl)-2H-chromen-2-one (4f).**<sup>3</sup> The product was purified by silica gel column chromatography with petroleum ether/ethyl acetate (20:1, v/v). Yellow solid (128.7 mg, 65%), mp 139–141 °C. <sup>1</sup>H NMR (400 MHz, CDCl<sub>3</sub>)  $\delta$  (ppm) 7.58–7.53 (m, 1H), 7.40 (d,  $J$  = 8.3 Hz, 1H), 7.32–7.30 (m, 2H), 7.24–7.11 (m, 8H), 7.06 (dd,  $J$  = 8.1, 1.6 Hz, 1H). <sup>13</sup>C NMR (100 MHz, CDCl<sub>3</sub>)  $\delta$  (ppm) 162.8 (d,  $J$  = 249.2 Hz), 159.6, 157.7, 153.4, 133.0, 132.1, 132.0 (d,  $J$  = 3.6 Hz), 130.3 (d,  $J$  = 8.3 Hz), 130.2, 129.1, 127.60, 127.58, 124.4, 121.5, 120.5, 116.9, 115.7 (d,  $J$  = 21.8 Hz).

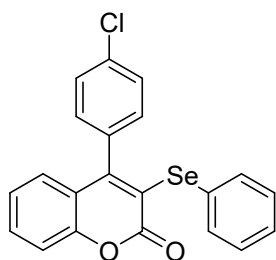

**4-(4-Chlorophenyl)-3-(phenylselanyl)-2H-chromen-2-one (4g).**<sup>3</sup> The product was purified by silica gel column chromatography with petroleum ether/ethyl acetate (20:1, v/v). Yellow solid (138.0 mg, 67%), mp 128–130 °C. <sup>1</sup>H NMR (400 MHz, CDCl<sub>3</sub>)  $\delta$  (ppm) 7.58–7.53 (m, 1H), 7.41 (d,  $J$  = 8.1 Hz, 3H), 7.32–7.28 (m, 2H), 7.25–7.15 (m, 4H), 7.10 (d,  $J$  = 8.0 Hz, 2H), 7.06–7.03 (m, 1H). <sup>13</sup>C NMR (100 MHz, CDCl<sub>3</sub>)  $\delta$  (ppm) 159.5, 157.4, 153.4, 135.0, 134.4, 133.1, 132.2, 130.0, 129.8, 129.1, 128.8, 127.7, 127.5, 124.4, 121.5, 120.3, 117.0.

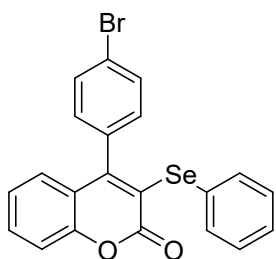

**4-(4-Bromophenyl)-3-(phenylselanyl)-2H-chromen-2-one (4h).**<sup>4</sup> The product was purified by silica gel column chromatography with petroleum ether/ethyl acetate (20:1, v/v). Yellow solid (157.3 mg, 69%), mp 105–107 °C. <sup>1</sup>H NMR (400 MHz, CDCl<sub>3</sub>)  $\delta$  (ppm) 7.57–7.53 (m, 3H),



7.31–7.29 (m, 1H), 7.33–7.28 (m, 2H), 7.25–7.15 (m, 4H), 7.06–7.03 (m, 3H).  $^{13}\text{C}$  NMR (100 MHz,  $\text{CDCl}_3$ )  $\delta$  (ppm) 159.5, 157.3, 153.4, 134.8, 133.1, 132.2, 131.8, 130.0, 129.1, 127.7, 127.5, 124.5, 123.2, 121.4, 120.2, 117.0.

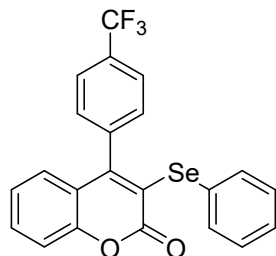

**3-(Phenylselanyl)-4-(4-(trifluoromethyl)phenyl)-2H-chromen-2-one (4i).**<sup>4</sup> The product was purified by silica gel column chromatography with petroleum ether/ethyl acetate (20:1, v/v). Yellow oil (122.7 mg, 55%).  $^1\text{H}$  NMR (400 MHz,  $\text{CDCl}_3$ )  $\delta$  (ppm) 7.67 (d,  $J = 7.9$  Hz, 2H), 7.59–7.55 (m, 1H), 7.43 (d,  $J = 8.3$  Hz, 1H), 7.28–7.12 (m, 8H), 6.96 (dd,  $J = 8.1, 1.5$  Hz, 1H).  $^{13}\text{C}$  NMR (100 MHz,  $\text{CDCl}_3$ )  $\delta$  (ppm) 159.5, 156.6, 153.4, 139.4, 133.4, 132.3, 130.8 (q,  $J = 32.7$  Hz), 129.8, 129.2, 128.8, 127.8, 127.1, 125.5 (q,  $J = 3.7$  Hz), 124.5, 123.8 (q,  $J = 272.5$  Hz), 121.8, 120.1, 117.0.

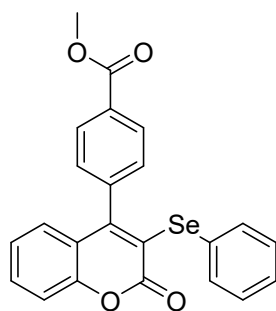

**Methyl 4-(2-oxo-3-(phenylselanyl)-2H-chromen-4-yl)benzoate (4j).** The product was purified by silica gel column chromatography with petroleum ether/ethyl acetate (10:1, v/v). Yellow oil (109.0 mg, 50%).  $^1\text{H}$  NMR (400 MHz,  $\text{CDCl}_3$ )  $\delta$  (ppm) 8.13–8.10 (m, 2H), 7.58–7.54 (m, 1H), 7.41 (dd,  $J = 8.3, 1.2$  Hz, 1H), 7.32–7.30 (m, 2H), 7.27–7.25 (m, 2H), 7.22–7.13 (m, 4H), 6.98 (dd,  $J = 8.0, 1.6$  Hz, 1H), 4.00 (s, 3H).  $^{13}\text{C}$  NMR (100 MHz,  $\text{CDCl}_3$ )  $\delta$  (ppm) 166.5, 159.5, 157.8, 153.4, 140.5, 133.1, 132.3, 130.5, 130.0, 129.8, 129.2, 128.5, 127.7, 127.4, 124.5, 121.1, 120.1, 117.0, 52.5. HRMS (ESI)  $m/z$ :  $[\text{M} + \text{H}]^+$  Calcd for  $\text{C}_{23}\text{H}_{17}\text{O}_4\text{Se}^+$  437.0287; Found 437.0293.

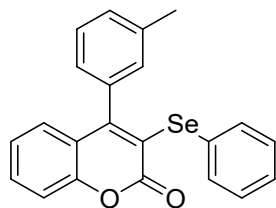

**3-(Phenylselanyl)-4-(*m*-tolyl)-2*H*-chromen-2-one (4k).**<sup>4</sup> The product was purified by silica gel column chromatography with petroleum ether/ethyl acetate (20:1, v/v). Yellow solid (141.1 mg, 72%), mp 109–111 °C. <sup>1</sup>H NMR (400 MHz, CDCl<sub>3</sub>)  $\delta$  (ppm) 7.56–7.52 (m, 1H), 7.41–7.33 (m, 4H), 7.28 (d,  $J$  = 6.0 Hz, 1H), 7.22–7.16 (m, 4H), 7.10 (dd,  $J$  = 8.0, 1.7 Hz, 1H), 7.02 (d,  $J$  = 7.5 Hz, 1H), 6.94 (s, 1H), 2.39 (s, 3H). <sup>13</sup>C NMR (100 MHz, CDCl<sub>3</sub>)  $\delta$  (ppm) 159.7, 159.2, 153.4, 138.2, 136.1, 132.9, 132.0, 130.4, 129.6, 129.0, 128.8, 128.5, 128.0, 127.4, 125.3, 124.3, 120.64, 120.58, 116.8, 21.6.

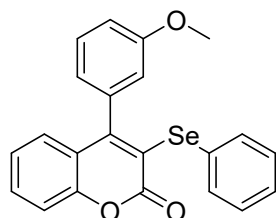

**4-(3-Methoxyphenyl)-3-(phenylselanyl)-2*H*-chromen-2-one (4l).**<sup>4</sup> The product was purified by silica gel column chromatography with petroleum ether/ethyl acetate (20:1, v/v). Yellow oil (153.0 mg, 75%). <sup>1</sup>H NMR (400 MHz, CDCl<sub>3</sub>)  $\delta$  (ppm) 7.56–7.52 (m, 1H), 7.42–7.35 (m, 4H), 7.22–7.16 (m, 4H), 7.12 (dd,  $J$  = 8.1, 1.8 Hz, 1H), 7.01 (dd,  $J$  = 8.4, 2.6 Hz, 1H), 6.80 (d,  $J$  = 7.6 Hz, 1H), 6.69–6.68 (m, 1H), 3.80 (s, 3H). <sup>13</sup>C NMR (100 MHz, CDCl<sub>3</sub>)  $\delta$  (ppm) 159.6, 159.5, 158.7, 153.5, 137.4, 132.9, 132.0, 130.3, 129.8, 129.0, 127.9, 127.4, 124.3, 120.6, 120.5, 120.4, 116.8, 114.5, 113.7, 55.3.

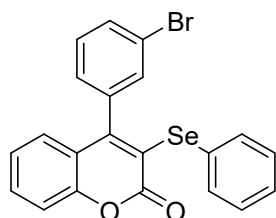

**4-(3-Bromophenyl)-3-(phenylselanyl)-2*H*-chromen-2-one (4m).**<sup>4</sup> The product was purified by silica gel column chromatography with petroleum ether/ethyl acetate (20:1, v/v). Yellow solid (139.1 mg, 61%), mp 103–105 °C. <sup>1</sup>H NMR (400 MHz, CDCl<sub>3</sub>)  $\delta$  (ppm) 7.59–7.53 (m, 2H), 7.40 (d,  $J$  = 8.4 Hz, 1H), 7.34–7.31 (m, 3H), 7.24–7.12 (m, 6H), 7.03 (dd,  $J$  = 8.1, 1.5 Hz, 1H). <sup>13</sup>C

NMR (100 MHz, CDCl<sub>3</sub>)  $\delta$  (ppm) 159.6, 156.7, 153.3, 137.8, 133.4, 132.2, 131.9, 131.2, 130.2, 129.8, 129.2, 127.9, 127.4, 127.0, 124.5, 122.6, 121.7, 120.2, 116.9.

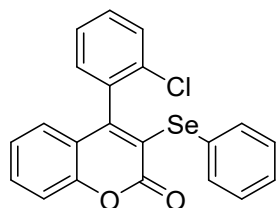

**4-(2-Chlorophenyl)-3-(phenylselanyl)-2H-chromen-2-one (4n).**<sup>4</sup> The product was purified by silica gel column chromatography with petroleum ether/ethyl acetate (20:1, v/v). Yellow oil (136.0 mg, 77%). <sup>1</sup>H NMR (400 MHz, CDCl<sub>3</sub>)  $\delta$  (ppm) 7.57–7.50 (m, 2H), 7.47–7.38 (m, 5H), 7.24–7.16 (m, 5H), 6.93 (dd,  $J$  = 8.0, 1.5 Hz, 1H). <sup>13</sup>C NMR (100 MHz, CDCl<sub>3</sub>)  $\delta$  (ppm) 159.3, 156.2, 153.4, 135.1, 133.3, 132.4, 132.1, 130.5, 130.0, 129.9, 129.3, 129.1, 127.7, 127.2, 127.1, 124.5, 121.8, 119.7, 116.9.

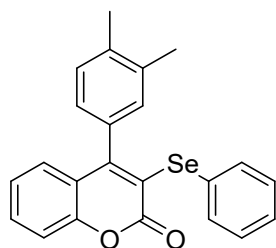

**4-(3,4-Dimethylphenyl)-3-(phenylselanyl)-2H-chromen-2-one (4o).** The product was purified by silica gel column chromatography with petroleum ether/ethyl acetate (20:1, v/v). Yellow oil (107.6 mg, 53%). <sup>1</sup>H NMR (400 MHz, CDCl<sub>3</sub>)  $\delta$  (ppm) 7.55–7.51 (m, 1H), 7.39 (d,  $J$  = 8.8 Hz, 1H), 7.36–7.34 (m, 2H), 7.24 (d,  $J$  = 7.8 Hz, 1H), 7.21–7.14 (m, 5H), 6.97 (dd,  $J$  = 7.6, 1.9 Hz, 1H), 6.91 (s, 1H), 2.36 (s, 3H), 2.29 (s, 3H). <sup>13</sup>C NMR (100 MHz, CDCl<sub>3</sub>)  $\delta$  (ppm) 159.6, 159.2, 153.4, 137.5, 136.8, 133.7, 132.8, 131.9, 130.4, 129.7, 129.4, 128.9, 128.1, 127.3, 125.7, 124.2, 120.7, 120.5, 116.8, 19.9, 19.8. HRMS (ESI)  $m/z$ : [M + H]<sup>+</sup> Calcd for C<sub>23</sub>H<sub>19</sub>O<sub>2</sub>Se<sup>+</sup> 407.0545; Found 407.0550.

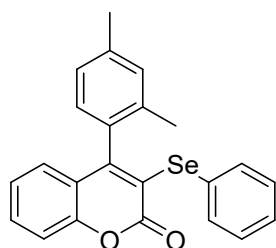

**4-(2,4-Dimethylphenyl)-3-(phenylselanyl)-2H-chromen-2-one (4p).** The product was purified by silica gel column chromatography with petroleum ether/ethyl acetate (20:1, v/v). Yellow oil

(99.5 mg, 49%). <sup>1</sup>H NMR (400 MHz, CDCl<sub>3</sub>) δ (ppm) 7.55–7.51 (m, 1H), 7.41–7.38 (m, 3H), 7.23–7.09 (m, 6H), 6.96–6.92 (m, 2H), 2.43 (s, 3H), 2.02 (s, 3H). <sup>13</sup>C NMR (100 MHz, CDCl<sub>3</sub>) δ (ppm) 159.4, 159.2, 153.4, 138.9, 134.7, 133.1, 133.0, 132.0, 131.1, 129.7, 129.0, 128.0, 127.5, 126.8, 124.4, 120.9, 120.3, 116.8, 21.4, 19.6. HRMS (ESI) m/z: [M + H]<sup>+</sup> Calcd for C<sub>23</sub>H<sub>19</sub>O<sub>2</sub>Se<sup>+</sup> 407.0545; Found 407.0549.

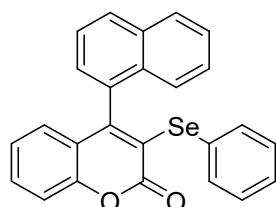

**4-(Naphthalen-1-yl)-3-(phenylselanyl)-2H-chromen-2-one (4q).**<sup>4</sup> The product was purified by silica gel column chromatography with petroleum ether/ethyl acetate (20:1, v/v). Yellow solid (158.4 mg, 74%), mp 127–129 °C. <sup>1</sup>H NMR (400 MHz, CDCl<sub>3</sub>) δ (ppm) 7.99 (d, *J* = 8.3 Hz, 1H), 7.95 (d, *J* = 8.2 Hz, 1H), 7.60–7.50 (m, 3H), 7.46–7.38 (m, 3H), 7.32 (dd, *J* = 7.1, 1.2 Hz, 1H), 7.27 (dd, *J* = 8.3, 1.6 Hz, 2H), 7.15–7.02 (m, 4H), 6.82 (dd, *J* = 8.0, 1.5 Hz, 1H). <sup>13</sup>C NMR (100 MHz, CDCl<sub>3</sub>) δ (ppm) 159.4, 157.5, 153.3, 133.8, 133.5, 133.4, 132.0, 130.4, 129.4, 129.2, 128.8, 128.6, 127.9, 127.6, 126.9, 126.5, 126.3, 125.3, 125.1, 124.4, 122.4, 120.8, 116.8.

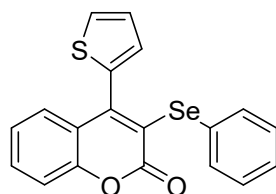

**3-(Phenylselanyl)-4-(thiophen-2-yl)-2H-chromen-2-one (4r).**<sup>3</sup> The product was purified by silica gel column chromatography with petroleum ether/ethyl acetate (20:1, v/v). Yellow solid (113.3 mg, 59%), mp 132–134 °C. <sup>1</sup>H NMR (400 MHz, CDCl<sub>3</sub>) δ (ppm) 7.57–7.53 (m, 2H), 7.44 (dd, *J* = 7.7, 1.9 Hz, 2H), 7.40–7.34 (m, 2H), 7.24–7.19 (m, 4H), 7.17–7.15 (m, 1H), 7.02 (dd, *J* = 3.6, 1.2 Hz, 1H). <sup>13</sup>C NMR (100 MHz, CDCl<sub>3</sub>) δ (ppm) 153.1, 135.7, 133.1, 132.1, 130.0, 129.3, 129.1, 127.72, 127.65, 127.6, 127.3, 124.4, 123.8, 120.8, 116.8.

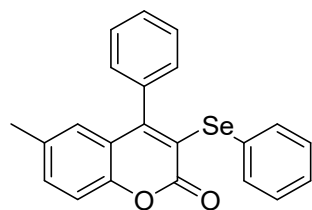

**6-Methyl-4-phenyl-3-(phenylselanyl)-2H-chromen-2-one (4s).**<sup>3</sup> The product was purified by silica gel column chromatography with petroleum ether/ethyl acetate (20:1, v/v). Yellow solid (147.0 mg, 75%), mp 119–121 °C. <sup>1</sup>H NMR (400 MHz, CDCl<sub>3</sub>) δ (ppm) 7.49–7.47 (m, 3H), 7.37–7.31 (m, 4H), 7.21–7.15 (m, 5H), 6.84 (s, 1H), 2.29 (s, 3H). <sup>13</sup>C NMR (100 MHz, CDCl<sub>3</sub>) δ (ppm) 159.8, 159.1, 151.7, 136.4, 134.0, 133.1, 132.7, 130.5, 129.0, 128.8, 128.5, 128.2, 127.6, 127.4, 120.6, 120.2, 116.6, 20.9.

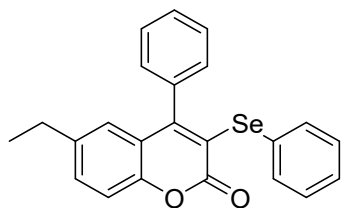

**6-Ethyl-4-phenyl-3-(phenylselanyl)-2H-chromen-2-one (4t).**<sup>3</sup> The product was purified by silica gel column chromatography with petroleum ether/ethyl acetate (20:1, v/v). Yellow solid (144.1 mg, 71%), mp 126–128 °C. <sup>1</sup>H NMR (400 MHz, CDCl<sub>3</sub>) δ (ppm) 7.48 (dd, *J* = 5.0, 1.9 Hz, 3H), 7.39 (dd, *J* = 8.5, 2.1 Hz, 1H), 7.35–7.32 (m, 3H), 7.21–7.14 (m, 5H), 6.86 (d, *J* = 2.0 Hz, 1H), 2.57 (q, *J* = 7.6 Hz, 2H), 1.15 (t, *J* = 7.6 Hz, 3H). <sup>13</sup>C NMR (100 MHz, CDCl<sub>3</sub>) δ (ppm) 159.8, 159.2, 151.8, 140.5, 136.4, 132.7, 131.9, 130.5, 129.0, 128.8, 128.5, 128.3, 127.3, 126.6, 120.6, 120.2, 116.7, 28.3, 15.7.

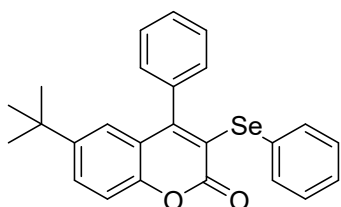

**6-(tert-Butyl)-4-phenyl-3-(phenylselanyl)-2H-chromen-2-one (4u).**<sup>3</sup> The product was purified by silica gel column chromatography with petroleum ether/ethyl acetate (20:1, v/v). Yellow solid (145.4 mg, 67%), mp 128–130 °C. <sup>1</sup>H NMR (400 MHz, CDCl<sub>3</sub>) δ (ppm) 7.60 (dd, *J* = 8.7, 2.4 Hz, 1H), 7.49–7.48 (m, 3H), 7.36–7.32 (m, 3H), 7.22–7.16 (m, 5H), 7.05 (d, *J* = 2.3 Hz, 1H), 1.21 (s, 9H). <sup>13</sup>C NMR (100 MHz, CDCl<sub>3</sub>) δ (ppm) 159.9, 159.6, 151.6, 147.3, 136.3, 132.6, 130.6, 129.7, 129.0, 128.9, 128.4, 128.3, 127.3, 124.2, 120.3, 119.8, 116.4, 34.6, 31.2.

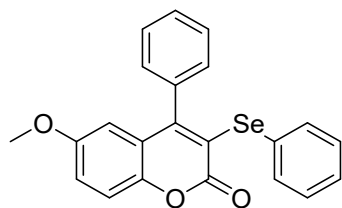

**6-Methoxy-4-phenyl-3-(phenylselanyl)-2H-chromen-2-one (4v).**<sup>4</sup> The product was purified by silica gel column chromatography with petroleum ether/ethyl acetate (20:1, v/v). Yellow solid (132.6 mg, 65%), mp 124–126 °C. <sup>1</sup>H NMR (400 MHz, CDCl<sub>3</sub>)  $\delta$  (ppm) 7.47 (dd,  $J$  = 5.0, 1.7 Hz, 3H), 7.35–7.32 (m, 3H), 7.21–7.15 (m, 5H), 7.12 (dd,  $J$  = 9.0, 3.0 Hz, 1H), 6.51 (d,  $J$  = 2.9 Hz, 1H), 3.67 (s, 3H). <sup>13</sup>C NMR (100 MHz, CDCl<sub>3</sub>)  $\delta$  (ppm) 159.7, 158.6, 155.9, 148.0, 136.2, 132.9, 130.4, 129.0, 128.9, 128.5, 128.2, 127.4, 121.3, 121.0, 119.1, 117.7, 110.8, 55.7.

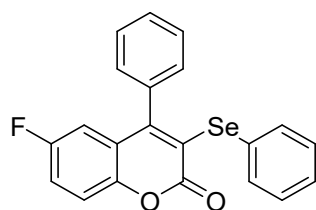

**6-Fluoro-4-phenyl-3-(phenylselanyl)-2H-chromen-2-one (4w).**<sup>3</sup> The product was purified by silica gel column chromatography with petroleum ether/ethyl acetate (20:1, v/v). Yellow oil (138.6 mg, 70%). <sup>1</sup>H NMR (400 MHz, CDCl<sub>3</sub>)  $\delta$  (ppm) 7.49–7.47 (m, 3H), 7.38–7.33 (m, 3H), 7.27–7.15 (m, 6H), 6.75 (dd,  $J$  = 9.0, 3.0 Hz, 1H). <sup>13</sup>C NMR (100 MHz, CDCl<sub>3</sub>)  $\delta$  (ppm) 159.2, 158.6 (d,  $J$  = 243.9 Hz), 157.5 (d,  $J$  = 2.9 Hz), 149.5 (d,  $J$  = 2.0 Hz), 135.7, 133.2, 129.9, 129.2, 129.1, 128.8, 128.2, 127.7, 122.5, 121.4 (d,  $J$  = 8.5 Hz), 119.3 (d,  $J$  = 24.7 Hz), 118.3 (d,  $J$  = 8.4 Hz), 113.2 (d,  $J$  = 25.3 Hz).

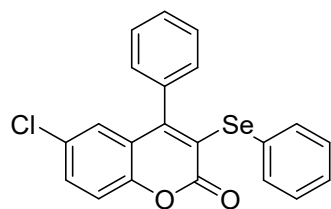

**6-Chloro-4-phenyl-3-(phenylselanyl)-2H-chromen-2-one (4x).**<sup>3</sup> The product was purified by silica gel column chromatography with petroleum ether/ethyl acetate (20:1, v/v). Yellow oil (150.4 mg, 73%). <sup>1</sup>H NMR (400 MHz, CDCl<sub>3</sub>)  $\delta$  (ppm) 7.50–7.47 (m, 4H), 7.35–7.33 (m, 3H), 7.23–7.16 (m, 5H), 7.03 (d,  $J$  = 2.5 Hz, 1H). <sup>13</sup>C NMR (100 MHz, CDCl<sub>3</sub>)  $\delta$  (ppm) 158.9, 157.2, 151.8, 135.5, 133.3, 131.8, 129.8, 129.7, 129.2, 129.1, 128.8, 128.2, 127.7, 127.0, 122.6, 121.6,

118.2.

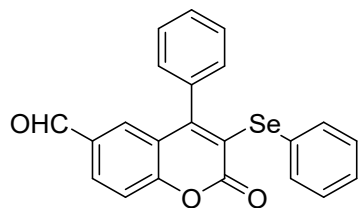

**2-Oxo-4-phenyl-3-(phenylselanyl)-2H-chromene-6-carbaldehyde (4y).** The product was purified by silica gel column chromatography with petroleum ether/ethyl acetate (5:1, v/v). Yellow solid (129.9 mg, 64%), mp 132–134 °C. <sup>1</sup>H NMR (400 MHz, CDCl<sub>3</sub>) δ (ppm) 9.88 (s, 1H), 8.07 (dd, *J* = 8.5, 1.9 Hz, 1H), 7.59 (d, *J* = 1.9 Hz, 1H), 7.54–7.50 (m, 4H), 7.37–7.35 (m, 2H), 7.24–7.17 (m, 5H). <sup>13</sup>C NMR (100 MHz, CDCl<sub>3</sub>) δ (ppm) 190.1, 158.5, 157.6, 157.0, 135.4, 133.4, 132.6, 131.8, 130.6, 129.6, 129.4, 129.2, 128.9, 128.2, 127.8, 122.6, 120.9, 118.0. HRMS (ESI) *m/z*: [M + H]<sup>+</sup> Calcd for C<sub>22</sub>H<sub>15</sub>O<sub>3</sub>Se<sup>+</sup> 407.0181; Found 407.0186.

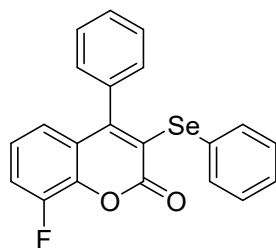

**8-Fluoro-4-phenyl-3-(phenylselanyl)-2H-chromen-2-one (4z).** The product was purified by silica gel column chromatography with petroleum ether/ethyl acetate (20:1, v/v). Yellow solid (134.6 mg, 68%), mp 103–105 °C. <sup>1</sup>H NMR (400 MHz, CDCl<sub>3</sub>) δ (ppm) 7.49–7.46 (m, 3H), 7.36–7.29 (m, 3H), 7.23–7.15 (m, 5H), 7.09 (td, *J* = 8.2, 4.7 Hz, 1H), 6.85 (d, *J* = 8.2 Hz, 1H). <sup>13</sup>C NMR (100 MHz, CDCl<sub>3</sub>) δ (ppm) 158.2, 158.1 (d, *J* = 2.5 Hz), 149.5 (d, *J* = 252.2 Hz), 141.8 (d, *J* = 11.8 Hz), 136.0, 133.2, 129.9, 129.11, 129.09, 128.6, 128.2, 127.7, 123.8 (d, *J* = 6.9 Hz), 123.0 (d, *J* = 3.8 Hz), 122.4, 122.2, 118.1 (d, *J* = 17.2 Hz). HRMS (ESI) *m/z*: [M + H]<sup>+</sup> Calcd for C<sub>21</sub>H<sub>14</sub>FO<sub>2</sub>Se<sup>+</sup> 397.0138; Found 397.0141.

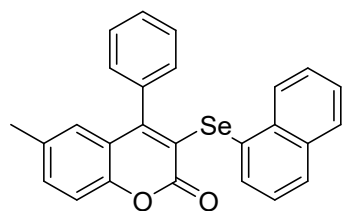

**6-Methyl-3-(naphthalen-1-ylselanyl)-4-phenyl-2H-chromen-2-one (4aa).** The product was

purified by silica gel column chromatography with petroleum ether/ethyl acetate (20:1, v/v). Yellow solid (152.5 mg, 69%), mp 129–131 °C. <sup>1</sup>H NMR (400 MHz, CDCl<sub>3</sub>) δ (ppm) 8.06–8.03 (m, 1H), 7.78–7.75 (m, 1H), 7.72 (d, *J* = 8.1 Hz, 1H), 7.53 (dd, *J* = 7.2, 1.2 Hz, 1H), 7.45–7.42 (m, 2H), 7.32–7.28 (m, 5H), 7.23–7.19 (m, 1H), 7.04–7.02 (m, 2H), 6.76 (s, 1H), 2.24 (s, 3H). <sup>13</sup>C NMR (100 MHz, CDCl<sub>3</sub>) δ (ppm) 159.9, 158.1, 151.4, 135.6, 134.0, 133.9, 133.8, 133.3, 132.8, 129.2, 128.8, 128.6, 128.4, 128.3, 128.1, 127.6, 127.2, 126.5, 126.1, 125.7, 120.9, 120.3, 116.5, 20.9. HRMS (ESI) *m/z*: [M + H]<sup>+</sup> Calcd for C<sub>26</sub>H<sub>19</sub>O<sub>2</sub>Se<sup>+</sup> 443.0545; Found 443.0544.

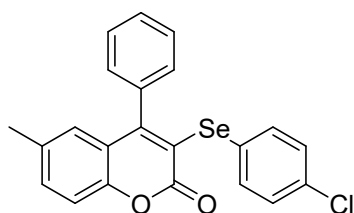

**3-((4-Chlorophenyl)selenanyl)-6-methyl-4-phenyl-2H-chromen-2-one (4ab)**. The product was purified by silica gel column chromatography with petroleum ether/ethyl acetate (20:1, v/v). Yellow oil (155.5 mg, 73%). <sup>1</sup>H NMR (400 MHz, CDCl<sub>3</sub>) δ (ppm) 7.50 (dd, *J* = 5.0, 1.9 Hz, 3H), 7.36 (dd, *J* = 8.5, 2.1 Hz, 1H), 7.30 (d, *J* = 8.4 Hz, 1H), 7.27–7.25 (m, 2H), 7.19–7.17 (m, 2H), 7.15–7.12 (m, 2H), 6.83 (s, 1H), 2.29 (s, 3H). <sup>13</sup>C NMR (100 MHz, CDCl<sub>3</sub>) δ (ppm) 159.7, 159.1, 151.7, 136.2, 134.3, 134.1, 133.7, 133.3, 129.2, 129.0, 128.6, 128.4, 128.2, 127.6, 120.4, 120.1, 116.6, 20.9. HRMS (ESI) *m/z*: [M + H]<sup>+</sup> Calcd for C<sub>22</sub>H<sub>16</sub>ClO<sub>2</sub>Se<sup>+</sup> 426.9999; Found 426.9994.

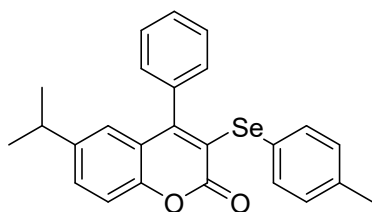

**6-Isopropyl-4-phenyl-3-(*p*-tolylselenanyl)-2H-chromen-2-one (4ac)**. The product was purified by silica gel column chromatography with petroleum ether/ethyl acetate (20:1, v/v). Yellow solid (160.6 mg, 74%), mp 135–137 °C. <sup>1</sup>H NMR (400 MHz, CDCl<sub>3</sub>) δ (ppm) 7.51–7.49 (m, 3H), 7.42 (dd, *J* = 8.6, 2.2 Hz, 1H), 7.33 (d, *J* = 8.5 Hz, 1H), 7.26–7.20 (m, 4H), 6.98 (d, *J* = 7.9 Hz, 2H), 6.87 (d, *J* = 2.1 Hz, 1H), 2.87–2.80 (m, 1H), 2.30 (s, 3H), 1.16 (d, *J* = 6.9 Hz, 6H). <sup>13</sup>C NMR (100 MHz, CDCl<sub>3</sub>) δ (ppm) 159.8, 158.9, 151.8, 145.0, 137.4, 136.4, 133.1, 130.2, 129.8, 128.8, 128.4, 128.3, 126.6, 125.3, 120.8, 120.2, 116.7, 33.6, 24.0, 21.2. HRMS (ESI) *m/z*: [M + H]<sup>+</sup> Calcd for C<sub>25</sub>H<sub>23</sub>O<sub>2</sub>Se<sup>+</sup> 435.0858; Found 435.0855.



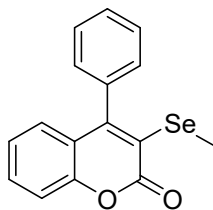

**3-(Methylselanyl)-4-phenyl-2H-chromen-2-one (4ad).**<sup>5</sup> The product was purified by silica gel column chromatography with petroleum ether/ethyl acetate (20:1, v/v). Yellow oil (131.1 mg, 83%). <sup>1</sup>H NMR (400 MHz, CDCl<sub>3</sub>)  $\delta$  (ppm) 7.58–7.53 (m, 3H), 7.51–7.49 (m, 1H), 7.39 (dd,  $J$  = 8.3, 1.1 Hz, 1H), 7.29 (dd,  $J$  = 7.3, 1.9 Hz, 2H), 7.18–7.14 (m, 1H), 7.06 (dd,  $J$  = 8.0, 1.6 Hz, 1H), 2.27 (s, 3H). <sup>13</sup>C NMR (100 MHz, CDCl<sub>3</sub>)  $\delta$  (ppm) 159.4, 156.0, 153.0, 136.4, 131.3, 129.1, 128.7, 128.3, 127.3, 124.2, 120.5, 120.2, 116.7, 8.4.

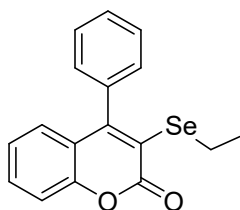

**3-(Ethylselanyl)-4-phenyl-2H-chromen-2-one (4ae).**<sup>5</sup> The product was purified by silica gel column chromatography with petroleum ether/ethyl acetate (20:1, v/v). Yellow oil (94.1 mg, 57%). <sup>1</sup>H NMR (400 MHz, CDCl<sub>3</sub>)  $\delta$  (ppm) 7.57–7.49 (m, 4H), 7.40 (dd,  $J$  = 8.2, 1.2 Hz, 1H), 7.29–7.24 (m, 2H), 7.16 (t,  $J$  = 7.6 Hz, 1H), 7.05 (dd,  $J$  = 8.0, 1.6 Hz, 1H), 2.99 (q,  $J$  = 7.5 Hz, 2H), 1.30 (t,  $J$  = 7.5 Hz, 3H). <sup>13</sup>C NMR (100 MHz, CDCl<sub>3</sub>)  $\delta$  (ppm) 159.6, 157.1, 153.1, 136.6, 131.3, 129.0, 128.7, 128.4, 127.4, 124.2, 120.6, 119.3, 116.7, 21.5, 15.7.

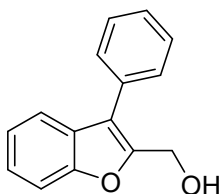

**(3-Phenylbenzofuran-2-yl)methanol (5).** The product was purified by silica gel column chromatography with petroleum ether/ethyl acetate (4:1, v/v). Yellow solid (103.1 mg, 92%), mp 90–92 °C. <sup>1</sup>H NMR (400 MHz, CDCl<sub>3</sub>)  $\delta$  (ppm) 7.71 (d,  $J$  = 7.4 Hz, 1H), 7.62–7.60 (m, 2H), 7.54 (t,  $J$  = 8.4 Hz, 3H), 7.47–7.43 (m, 1H), 7.41–7.37 (m, 1H), 7.32 (t,  $J$  = 7.6 Hz, 1H), 4.85 (s, 2H), 2.73 (brs, 1H). <sup>13</sup>C NMR (100 MHz, CDCl<sub>3</sub>)  $\delta$  (ppm) 154.5, 151.8, 131.8, 129.2, 129.0, 128.1, 127.7, 125.0, 123.1, 120.5, 119.8, 111.5, 56.3. HRMS (ESI)  $m/z$ : [M + H]<sup>+</sup> Calcd for C<sub>15</sub>H<sub>13</sub>O<sub>2</sub><sup>+</sup>

225.0911; Found 225.0920.

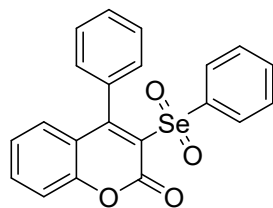

**4-Phenyl-3-(phenylselenonyl)-2H-chromen-2-one (6).** The product was purified by silica gel column chromatography with petroleum ether/ethyl acetate (1:1, v/v). Yellow solid (200.9 mg, 98%), mp 135–137 °C. <sup>1</sup>H NMR (400 MHz, CDCl<sub>3</sub>)  $\delta$  (ppm) 7.71 (dd,  $J$  = 6.7, 3.0 Hz, 2H), 7.62–7.55 (m, 3H), 7.51–7.40 (m, 5H), 7.33 (d,  $J$  = 8.3 Hz, 1H), 7.21–7.17 (m, 2H), 7.09 (dd,  $J$  = 8.1, 1.6 Hz, 1H). <sup>13</sup>C NMR (100 MHz, CDCl<sub>3</sub>)  $\delta$  (ppm) 160.1, 157.0, 153.9, 140.1, 133.9, 131.1, 131.0, 130.1, 129.3, 129.0, 128.8, 128.6, 128.4, 126.6, 124.8, 120.1, 117.1. HRMS (ESI)  $m/z$ : [M + H]<sup>+</sup> Calcd for C<sub>21</sub>H<sub>15</sub>O<sub>4</sub>Se<sup>+</sup> 411.0131; Found 441.0135.

## References

- (1) J.-D. Fang, X.-B. Yan, W.-J. Lin, Y.-C. Zhao and X.-Y. Liu, *Org. Lett.*, 2019, **21**, 7635–7638.
- (2) H. Peng, N. Akhmedov, Y. Liang, N. Jiao and X. Shi, *J. Am. Chem. Soc.*, 2015, **137**, 8912–8915.
- (3) J.-D. Fang, X.-B. Yan, L. Zhou, Y.-Z. Wang and X.-Y. Liu, *Adv. Synth. Catal.*, 2019, **361**, 1985–1990.
- (4) J. Fang, X. Yan, L. Zhou, Y. Wang and X. Liu, *Adv. Synth. Catal.*, 2019, **361**, 1985–1990.
- (5) J. Hua, Z. Fang, J. Xu, M. Bian, C. Liu, W. He, N. Zhu, Z. Yang and K. Guo, *Green Chem.*, 2019, **21**, 4706–4711.

## 5 $^1\text{H}$ and $^{13}\text{C}$ NMR spectra of the products 3, 4, 5 and 6

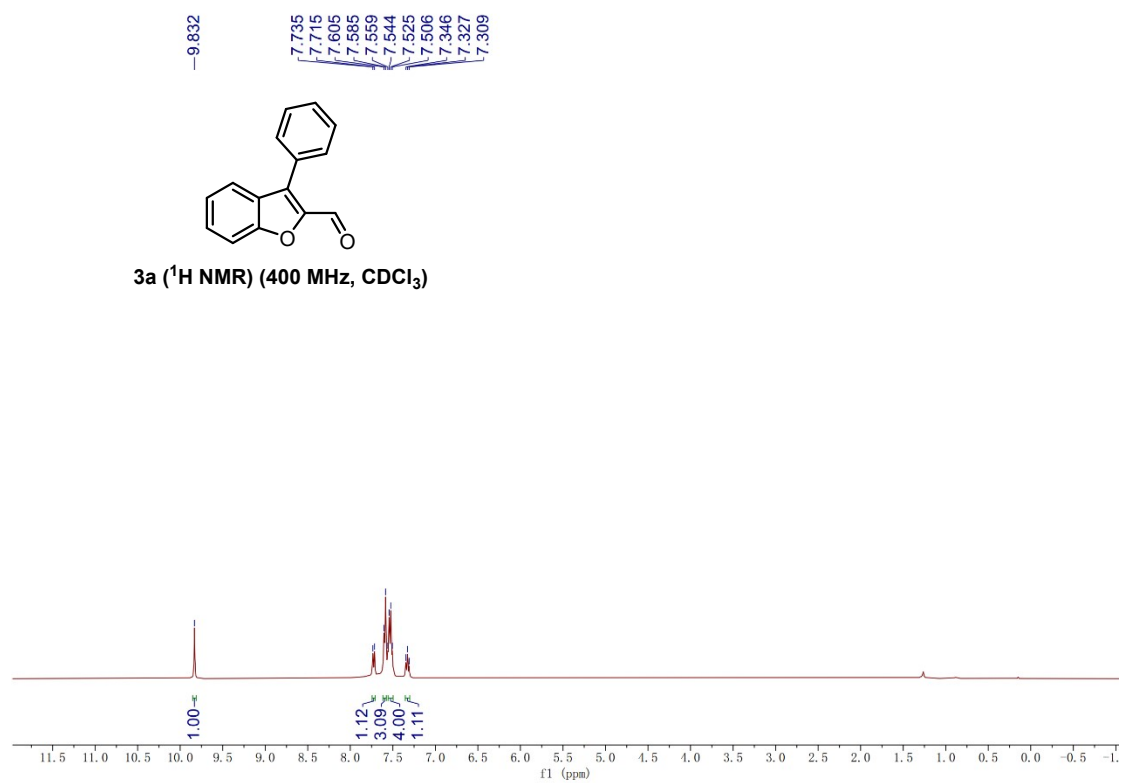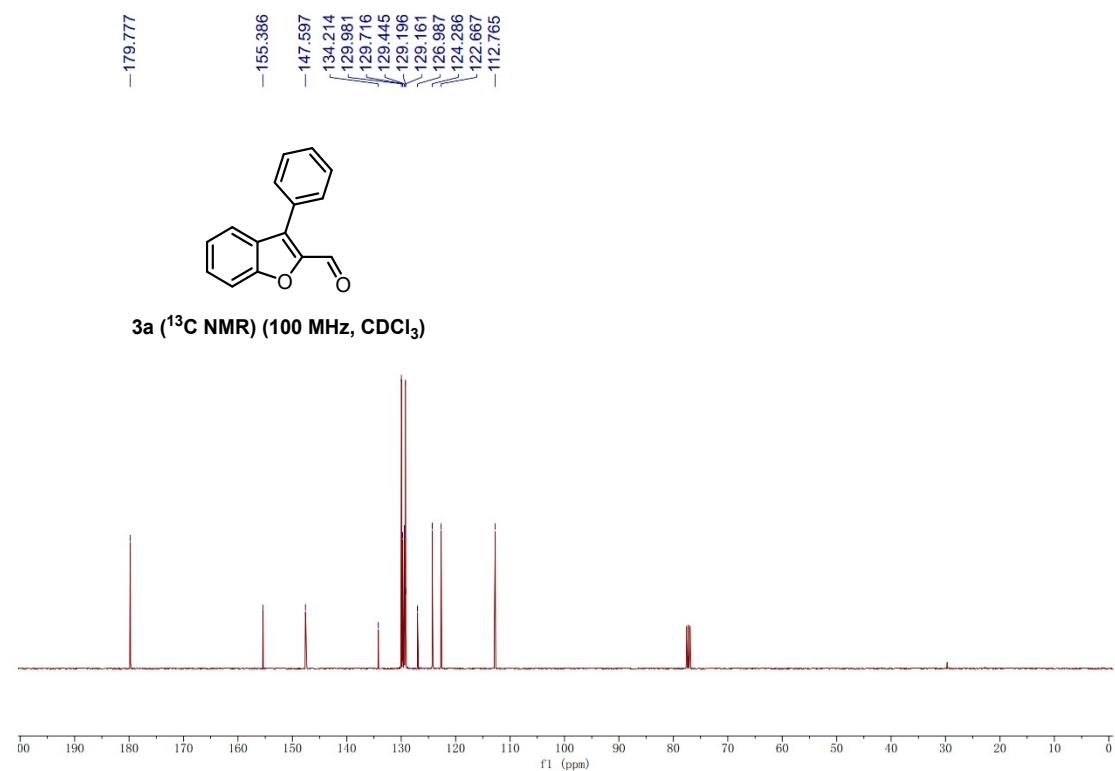

9.882  
7.770  
7.767  
7.765  
7.750  
7.747  
7.745  
7.686  
7.683  
7.681  
7.665  
7.662  
7.660  
7.653  
7.649  
7.644  
7.636  
7.631  
7.623  
7.619  
7.605  
7.602  
7.598  
7.584  
7.580  
7.425  
7.422  
7.407  
7.405  
7.402  
7.387  
7.385  
7.318  
7.313  
7.305  
7.302  
7.297  
7.292  
7.284  
7.281  
7.275

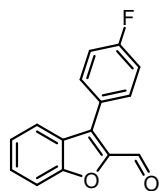

**3b (<sup>1</sup>H NMR) (400 MHz, CDCl<sub>3</sub>)**

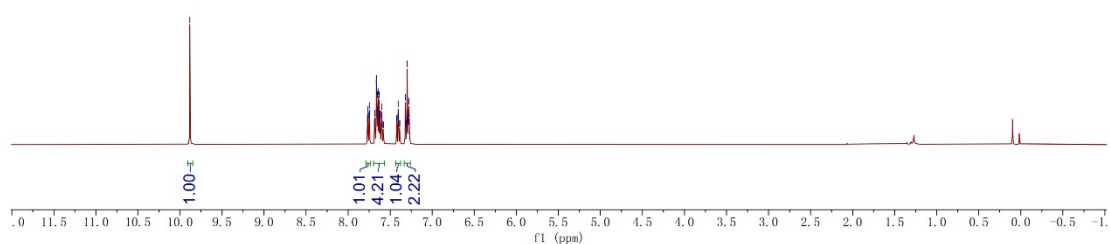

179.664  
164.706  
162.220  
155.423  
147.600  
133.014  
131.806  
131.723  
129.874  
127.010  
125.252  
125.218  
124.426  
122.466  
116.550  
116.332  
112.937

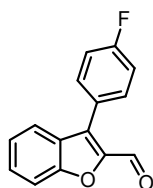

**3b (<sup>13</sup>C NMR) (100 MHz, CDCl<sub>3</sub>)**

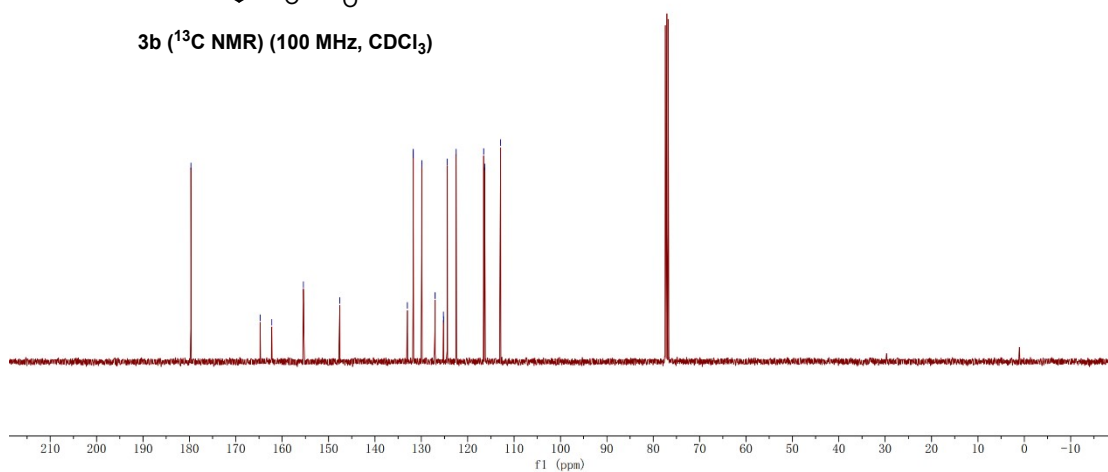

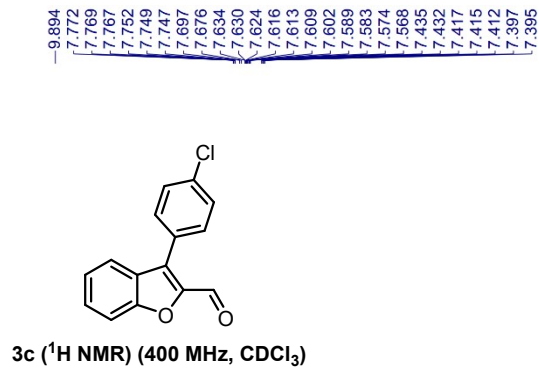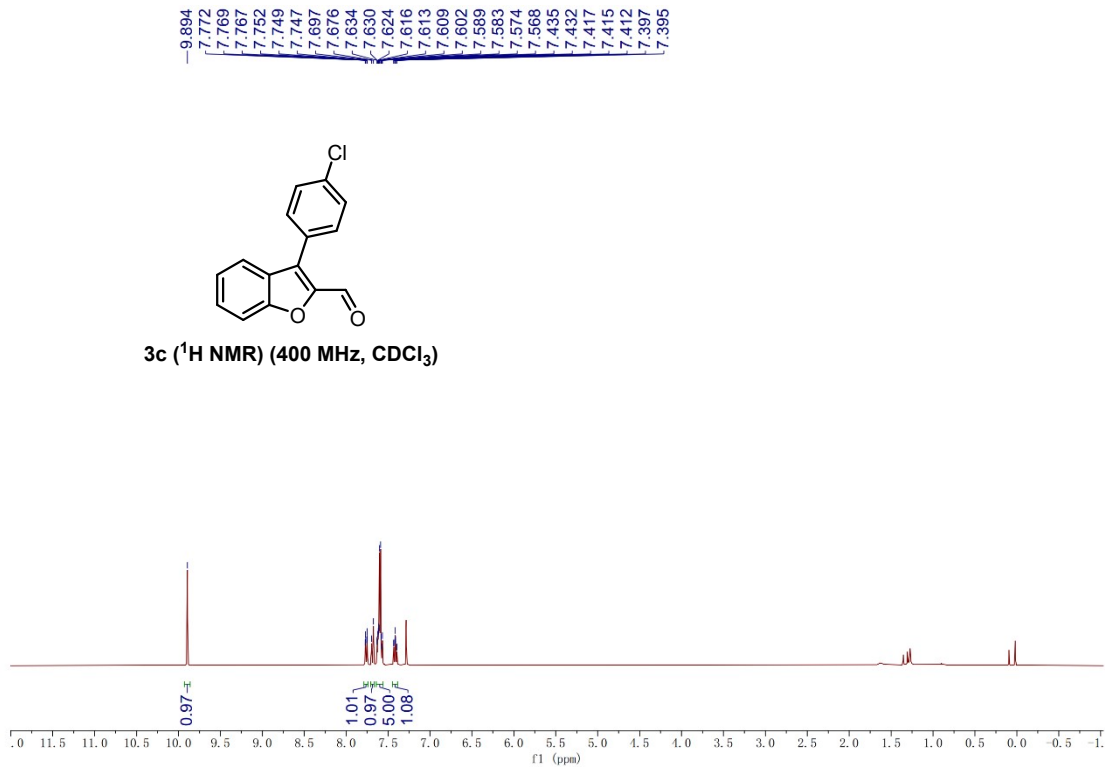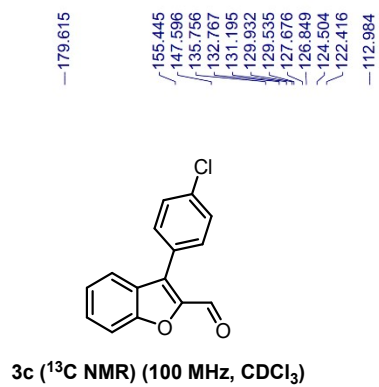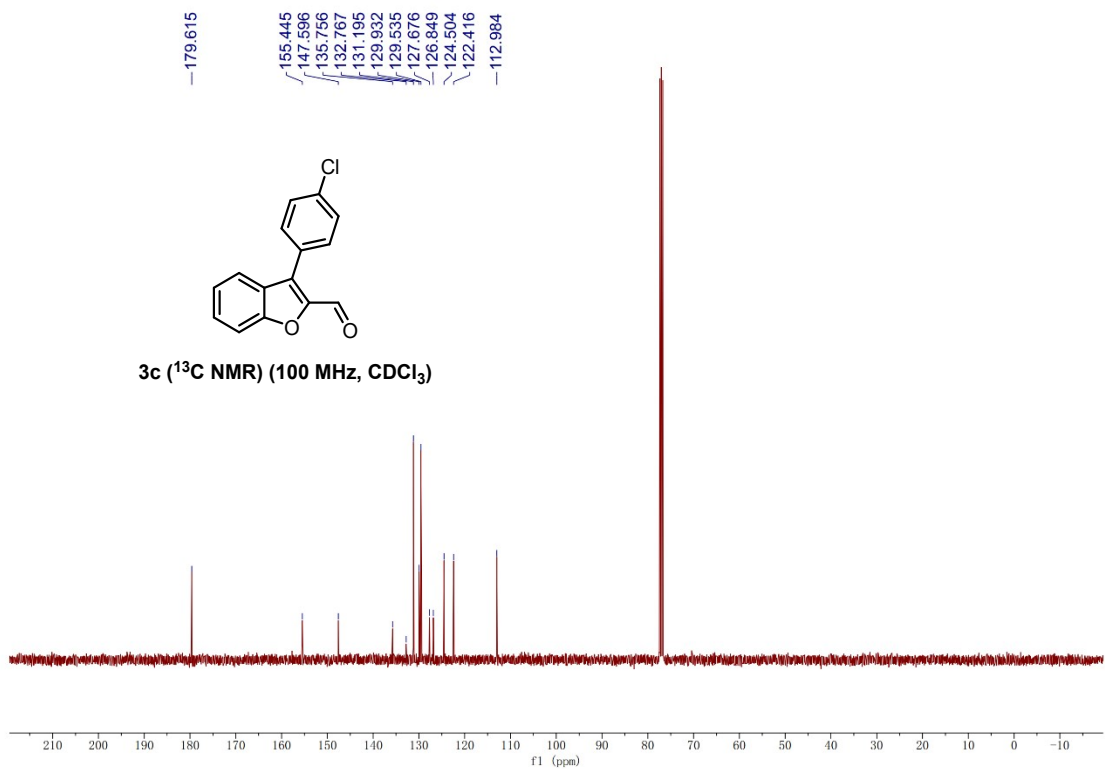

9.891  
7.763  
7.761  
7.758  
7.751  
7.745  
7.740  
7.729  
7.724  
7.718  
7.690  
7.689  
7.628  
7.625  
7.610  
7.607  
7.603  
7.589  
7.586  
7.555  
7.549  
7.544  
7.533  
7.528  
7.522  
7.430  
7.427  
7.412  
7.410  
7.407  
7.392  
7.390

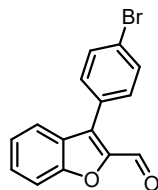

3d ( $^1\text{H}$  NMR) (400 MHz,  $\text{CDCl}_3$ )

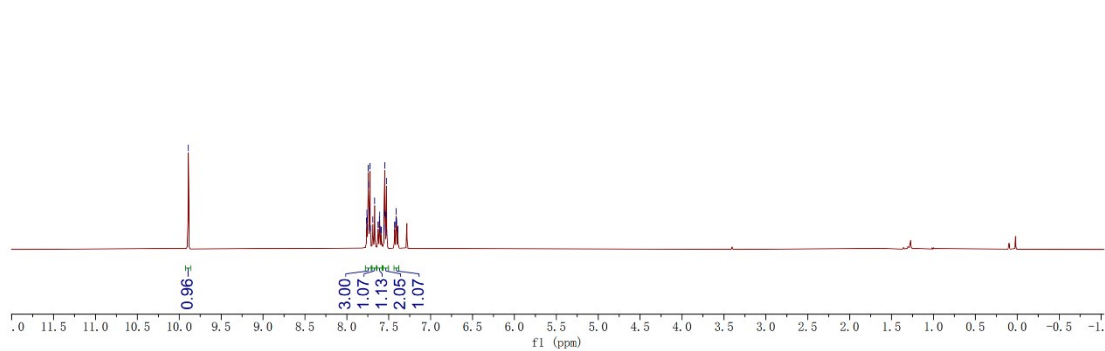

179.576  
155.449  
147.548  
132.703  
132.474  
131.438  
129.916  
128.157  
126.786  
124.505  
123.946  
122.392  
112.968

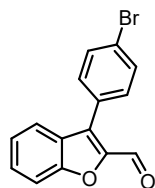

3d ( $^{13}\text{C}$  NMR) (100 MHz,  $\text{CDCl}_3$ )

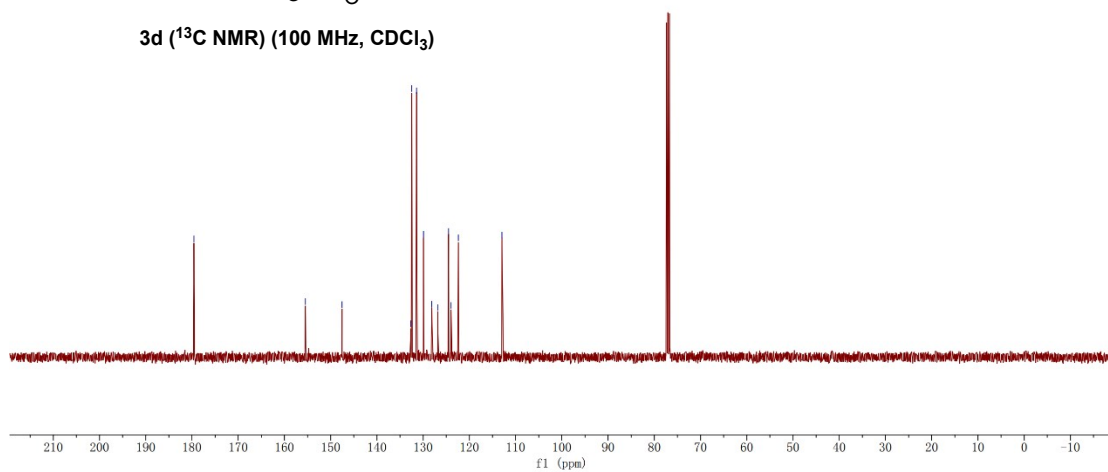

9.919  
7.908  
7.888  
7.812  
7.791  
7.752  
7.732  
7.716  
7.695  
7.659  
7.656  
7.641  
7.638  
7.620  
7.617  
7.461  
7.442  
7.423

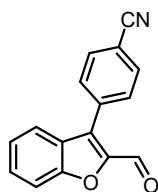

3e (<sup>1</sup>H NMR) (400 MHz, CDCl<sub>3</sub>)

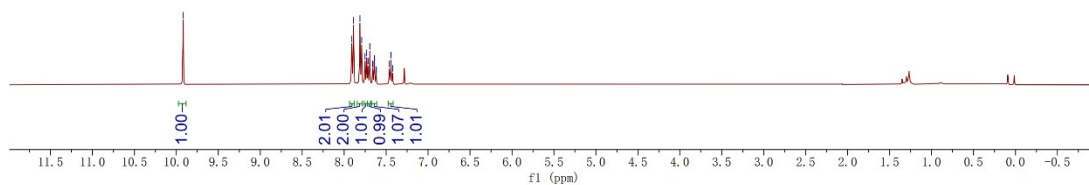

179.474  
155.422  
147.686  
134.139  
132.877  
131.127  
130.641  
130.131  
126.469  
124.869  
122.129  
118.260  
113.210  
113.109

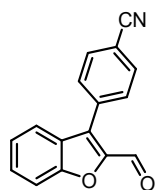

3e (<sup>13</sup>C NMR) (100 MHz, CDCl<sub>3</sub>)

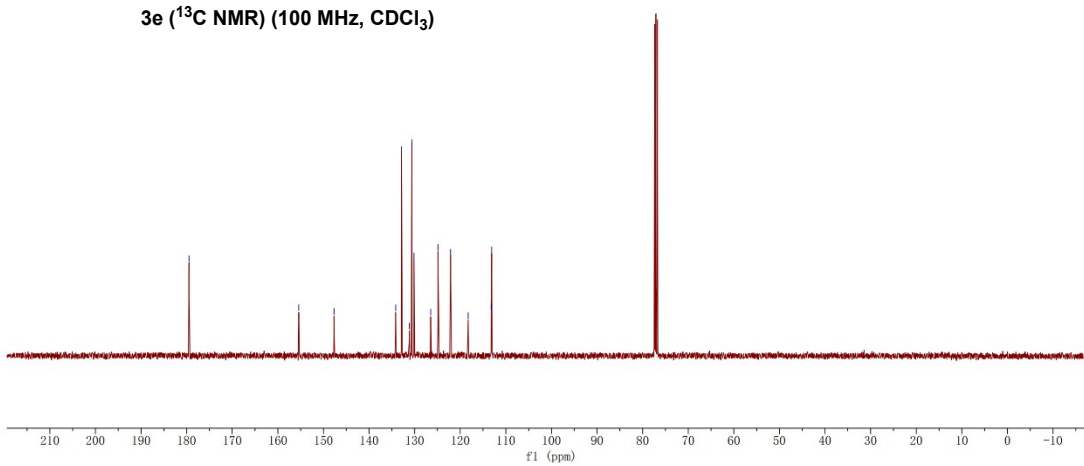

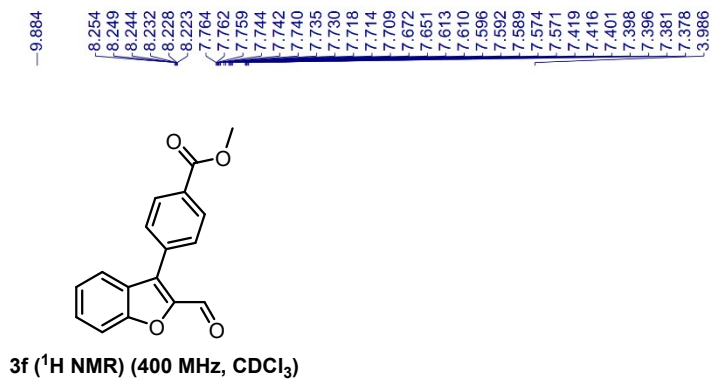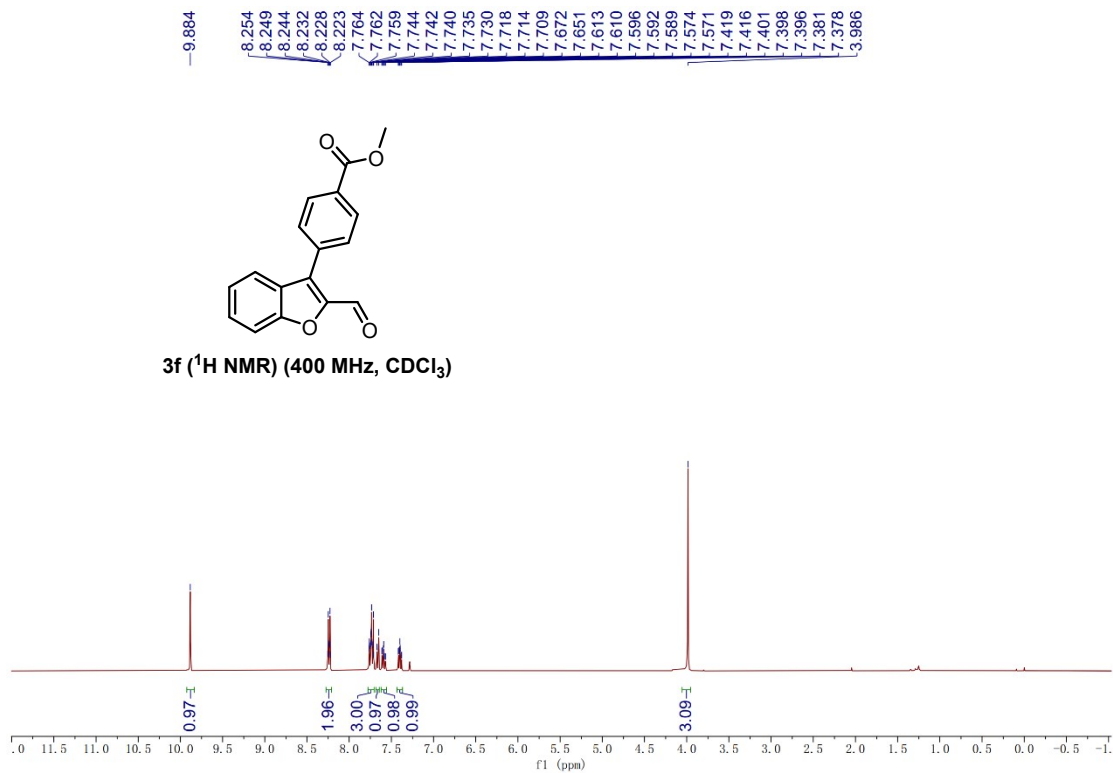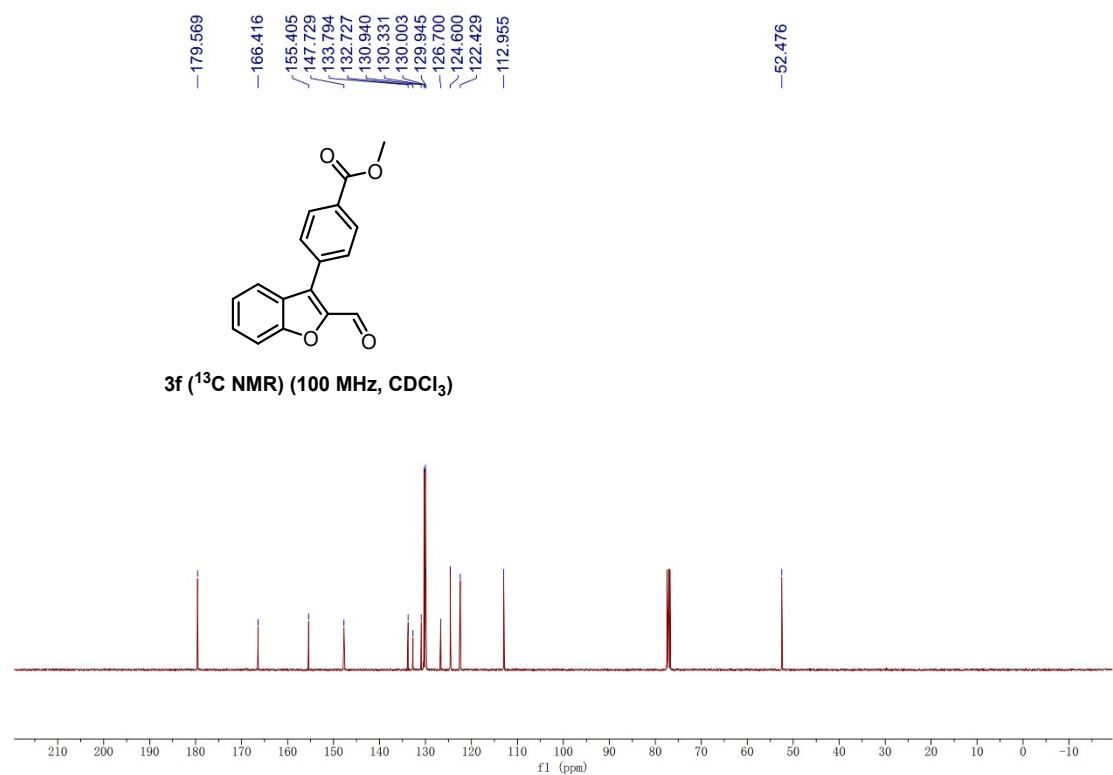



9.911  
7.877  
7.856  
7.808  
7.788  
7.772  
7.770  
7.767  
7.753  
7.750  
7.747  
7.710  
7.708  
7.705  
7.689  
7.687  
7.684  
7.647  
7.644  
7.630  
7.626  
7.623  
7.608  
7.605  
7.450  
7.447  
7.432  
7.430  
7.427  
7.412  
7.410

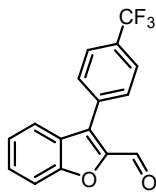

**3g (<sup>1</sup>H NMR) (400 MHz, CDCl<sub>3</sub>)**

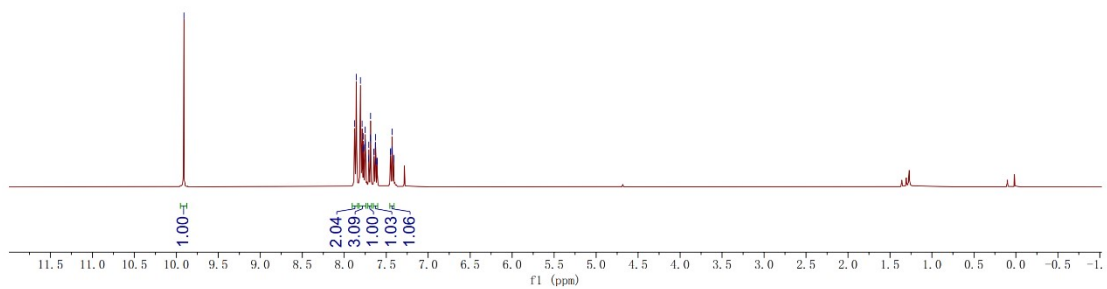

179.521  
155.421  
143.792  
132.072  
131.930  
131.600  
131.273  
130.946  
130.349  
130.024  
126.736  
126.211  
126.173  
126.136  
126.098  
125.219  
124.690  
122.511  
122.288  
113.024

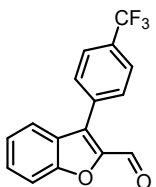

**3g (<sup>13</sup>C NMR) (100 MHz, CDCl<sub>3</sub>)**

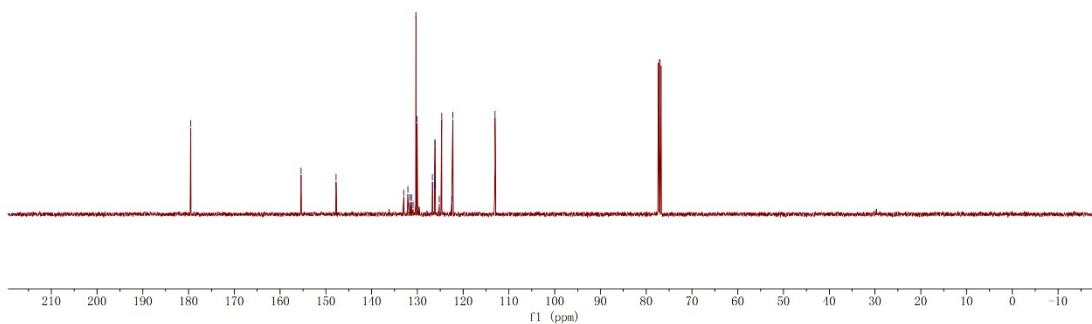

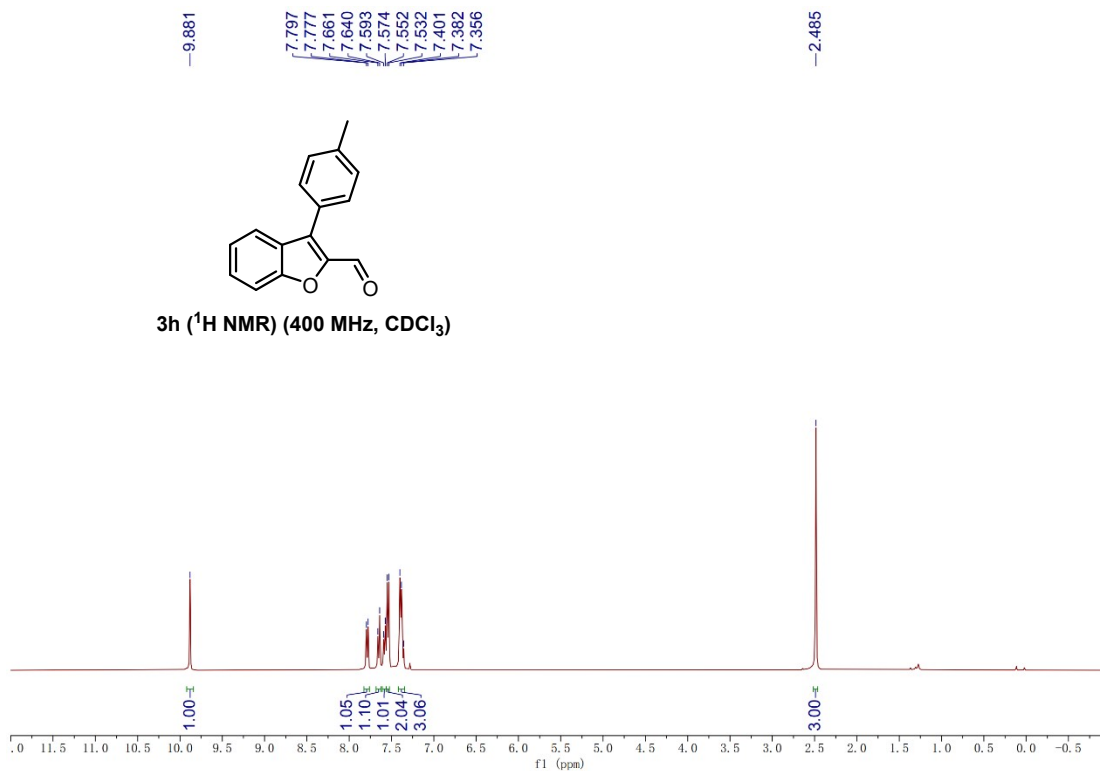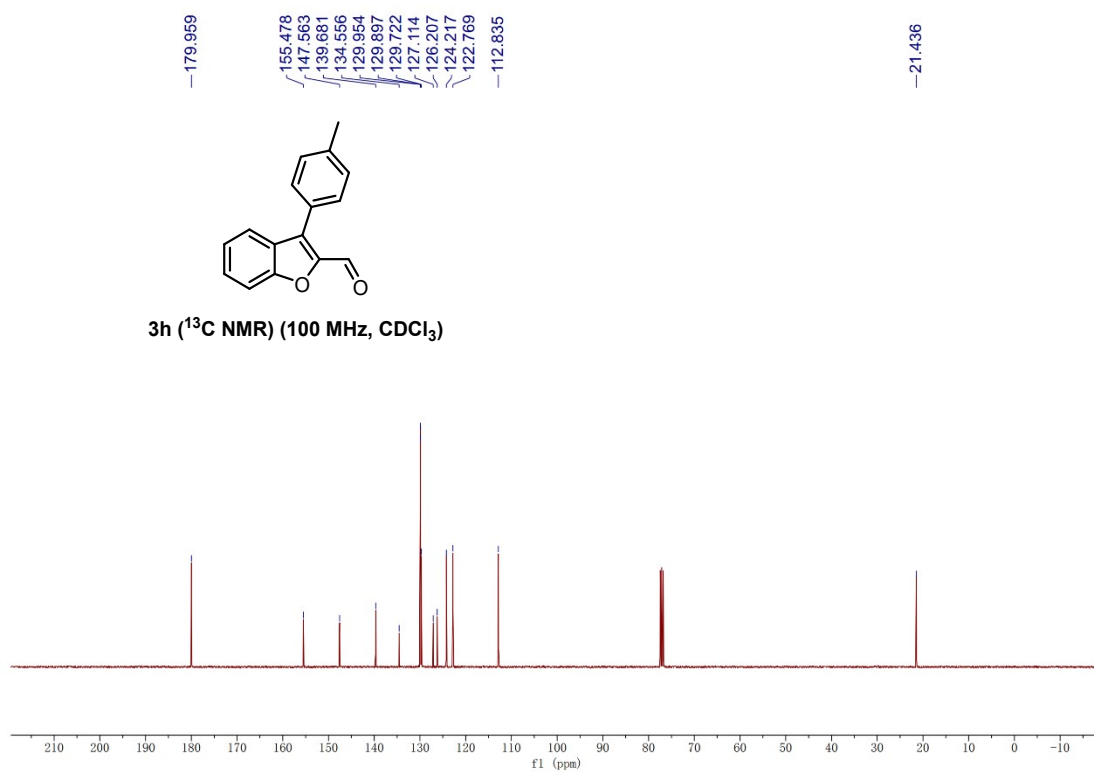

9.895  
7.816  
7.813  
7.796  
7.792  
7.667  
7.646  
7.597  
7.594  
7.585  
7.579  
7.576  
7.565  
7.558  
7.555  
7.431  
7.411  
7.398  
7.395  
7.380  
7.378  
7.375  
7.360  
7.357

2.814  
2.795  
2.776  
2.757

1.364  
1.345  
1.326

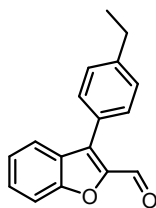

3i (<sup>1</sup>H NMR) (400 MHz, CDCl<sub>3</sub>)

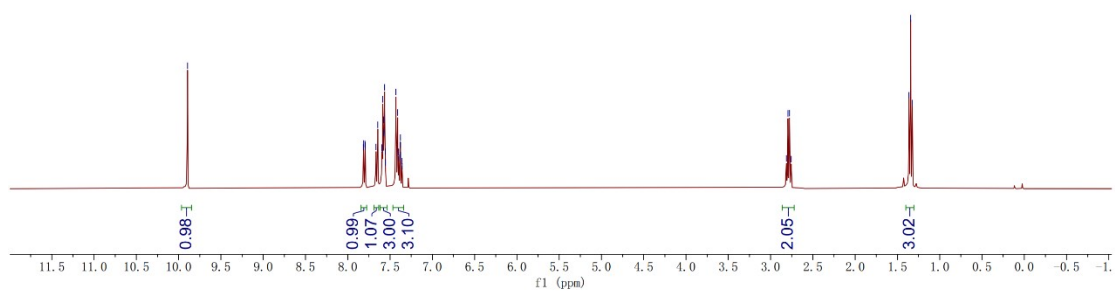

179.987

155.490  
147.589  
145.918  
134.568  
129.995  
129.707  
128.773  
127.133  
126.453  
124.200  
122.811  
112.835

28.768

15.482

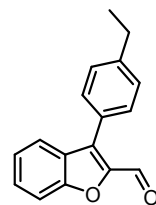

3i (<sup>13</sup>C NMR) (100 MHz, CDCl<sub>3</sub>)

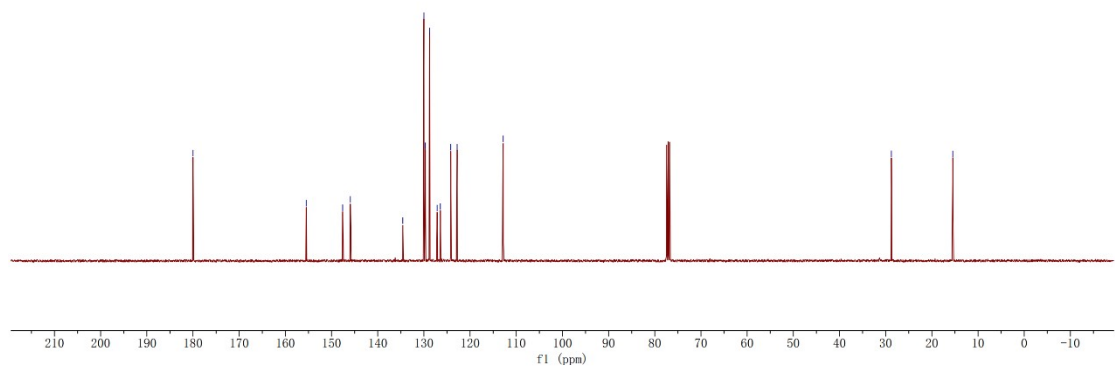

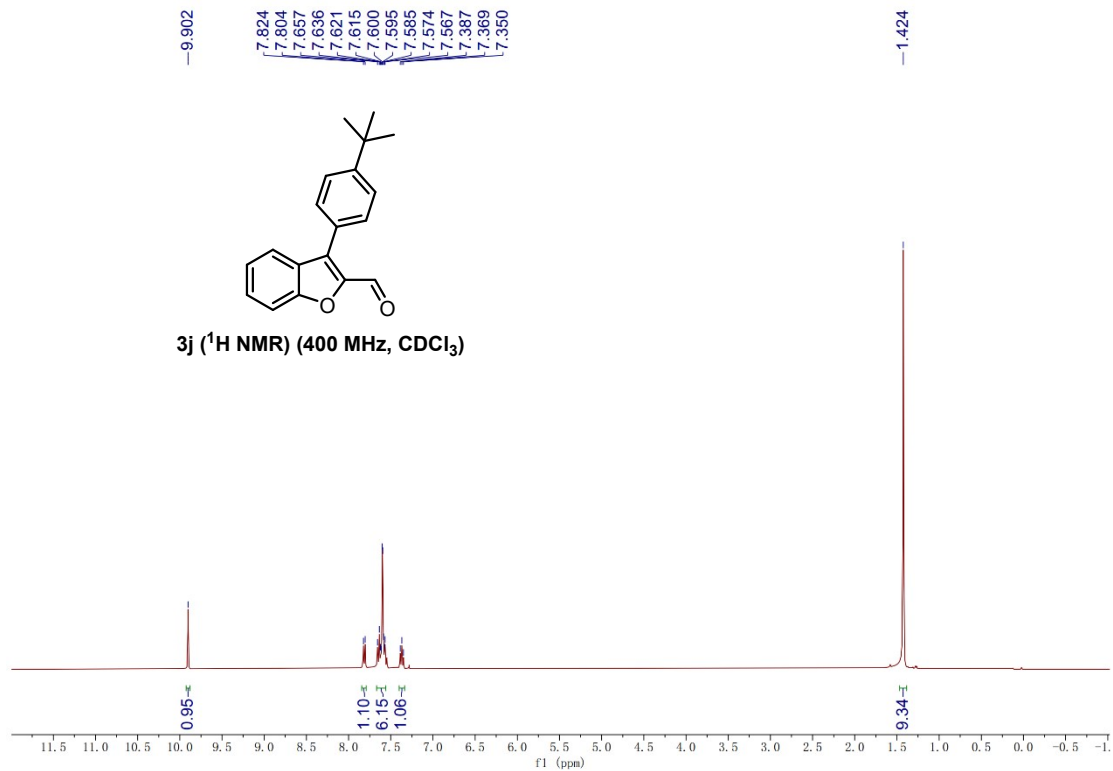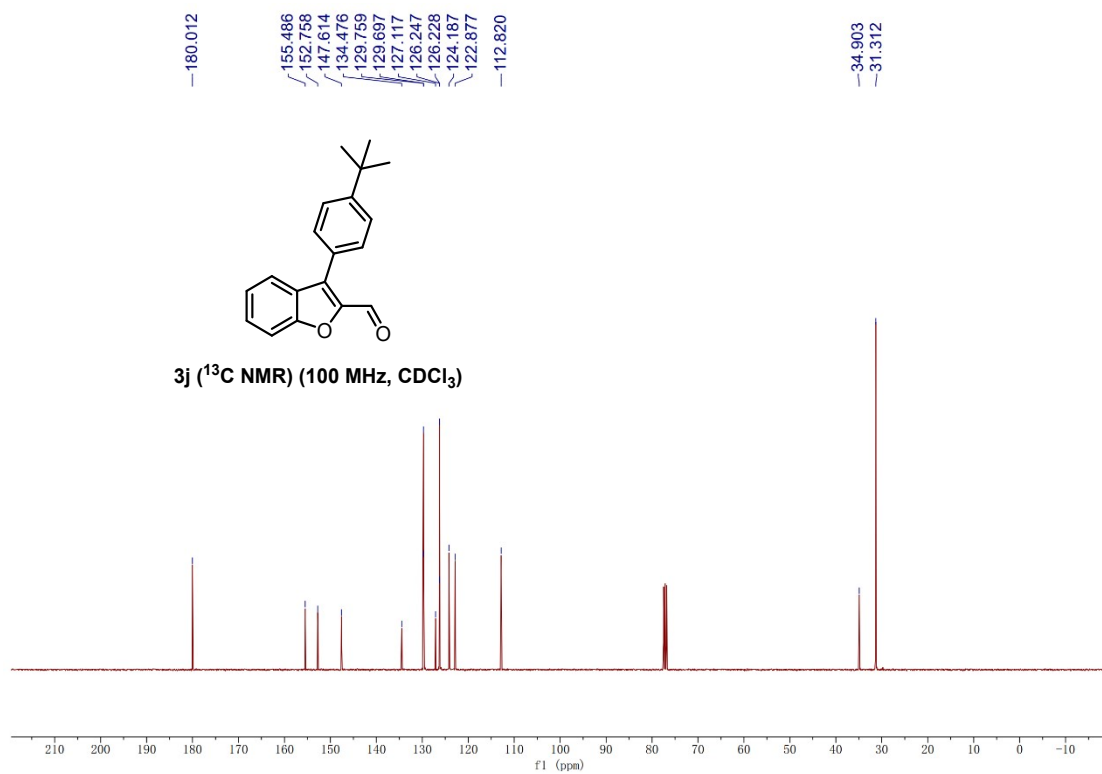

9.969  
7.872  
7.852  
7.837  
7.832  
7.821  
7.816  
7.757  
7.752  
7.741  
7.736  
7.722  
7.718  
7.708  
7.705  
7.700  
7.698  
7.687  
7.636  
7.633  
7.619  
7.615  
7.612  
7.594  
7.552  
7.533  
7.514  
7.467  
7.463  
7.460  
7.444  
7.441  
7.426  
7.423  
7.406  
7.403

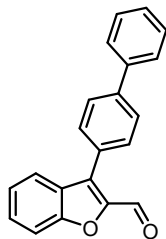

3k (<sup>1</sup>H NMR) (400 MHz, CDCl<sub>3</sub>)

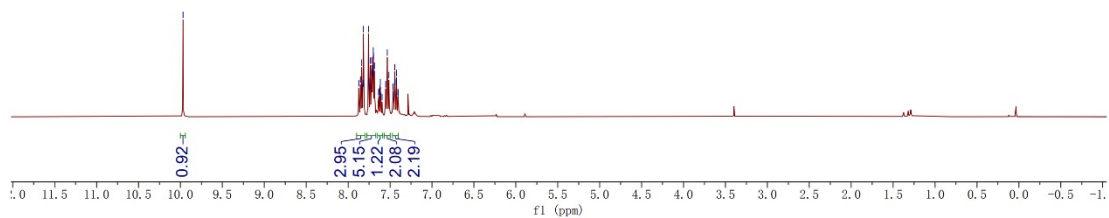

179.878  
155.540  
147.709  
142.387  
140.079  
133.941  
130.451  
129.805  
129.042  
128.120  
127.979  
127.899  
127.188  
127.082  
124.952  
122.743  
112.926

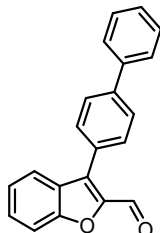

3k (<sup>13</sup>C NMR) (100 MHz, CDCl<sub>3</sub>)

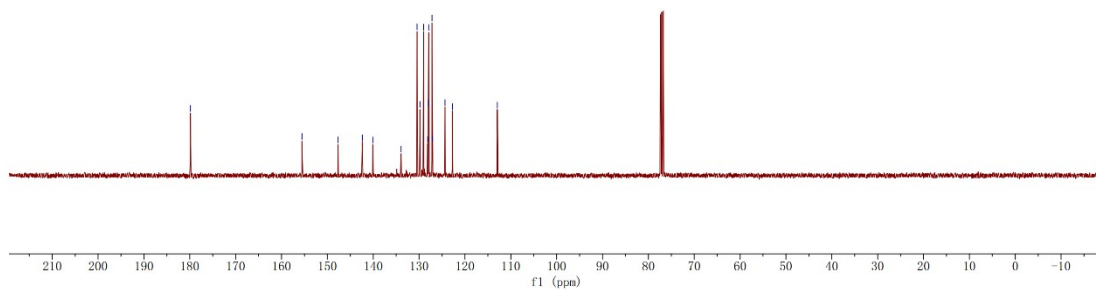

9.917  
7.792  
7.772  
7.693  
7.672  
7.630  
7.613  
7.609  
7.599  
7.588  
7.579  
7.565  
7.559  
7.545  
7.454  
7.450  
7.447  
7.432  
7.428  
7.415  
7.397  
7.387  
7.374  
7.368  
7.363  
7.292  
7.284  
7.271  
7.264  
7.249  
7.243

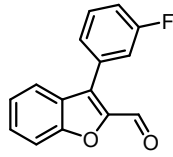

3I (<sup>1</sup>H NMR) (400 MHz, CDCl<sub>3</sub>)

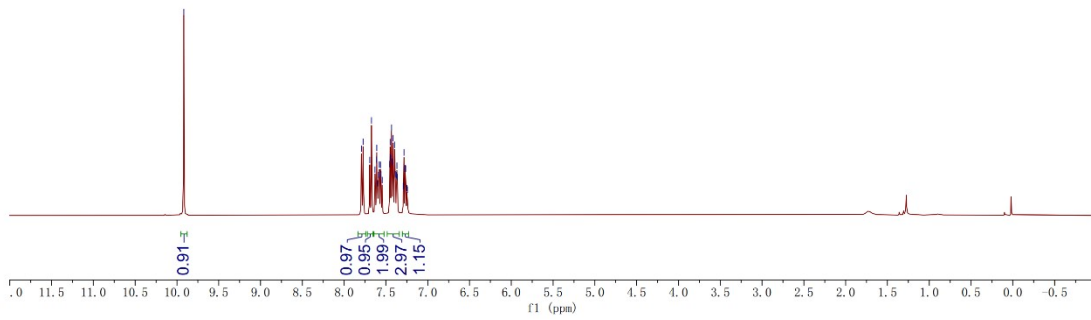

179.573  
164.244  
161.778  
155.413  
147.702  
132.549  
131.328  
131.246  
130.930  
130.845  
129.900  
126.790  
125.875  
125.844  
124.526  
122.426  
117.006  
116.783  
116.575  
116.365  
112.948

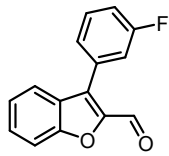

3I (<sup>13</sup>C NMR) (100 MHz, CDCl<sub>3</sub>)

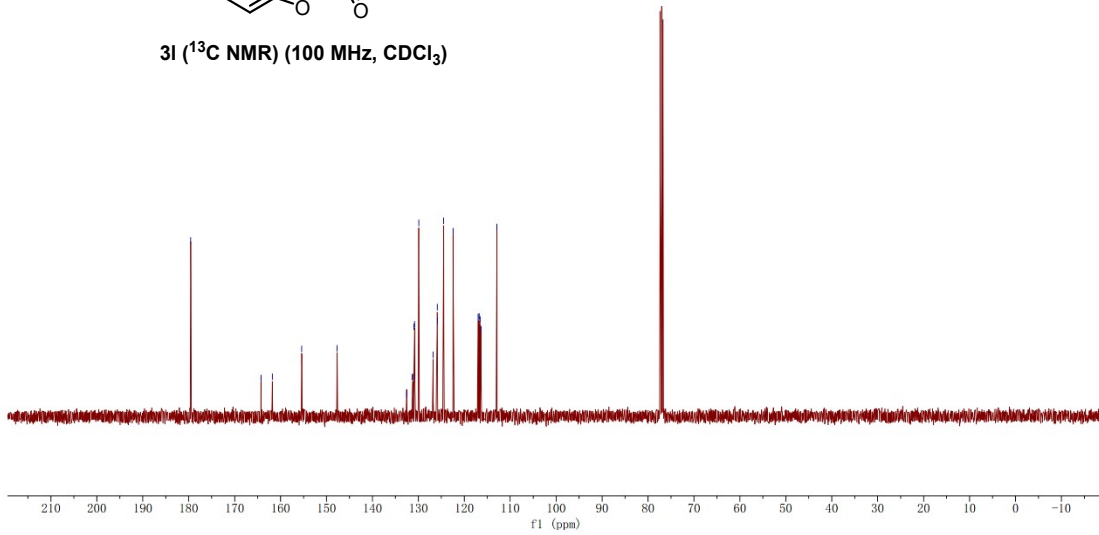

9.890  
7.806  
7.802  
7.797  
7.769  
7.749  
7.701  
7.698  
7.693  
7.685  
7.681  
7.673  
7.663  
7.661  
7.659  
7.624  
7.621  
7.607  
7.603  
7.597  
7.594  
7.590  
7.586  
7.582  
7.578  
7.575  
7.571  
7.485  
7.466  
7.446  
7.431  
7.428  
7.413  
7.411  
7.408  
7.393  
7.390

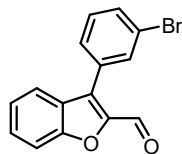

3m ( $^1\text{H}$  NMR) (400 MHz,  $\text{CDCl}_3$ )

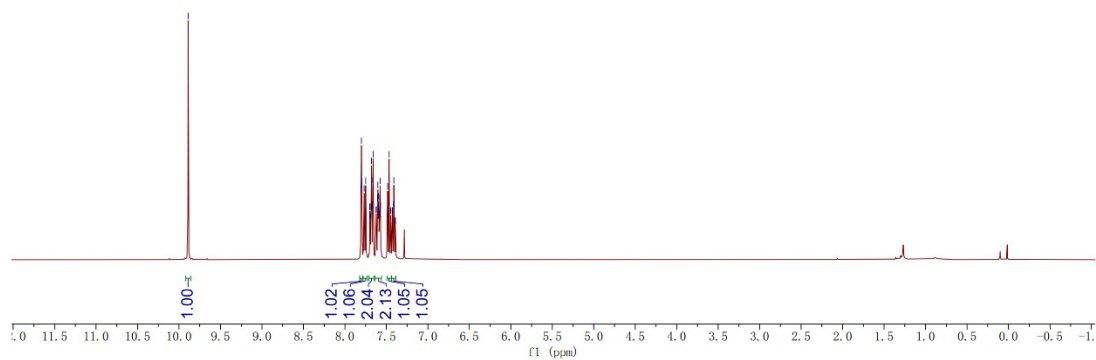

179.522  
155.372  
147.697  
132.649  
132.493  
132.313  
131.264  
130.720  
129.962  
128.657  
128.732  
124.575  
123.247  
122.386  
112.960

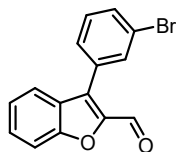

3m ( $^{13}\text{C}$  NMR) (100 MHz,  $\text{CDCl}_3$ )

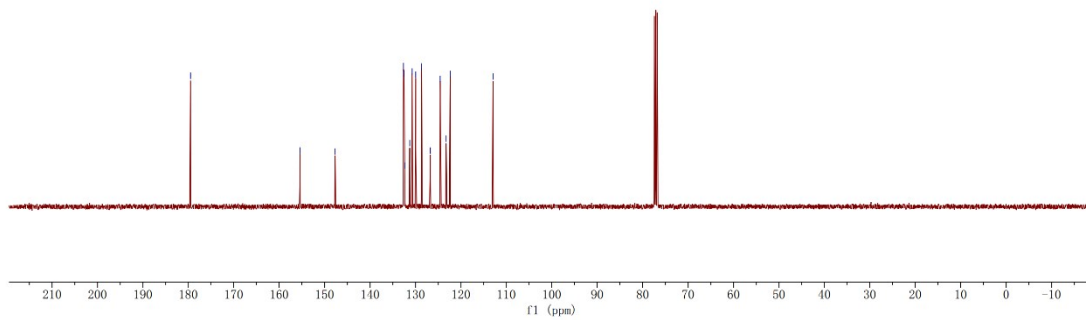

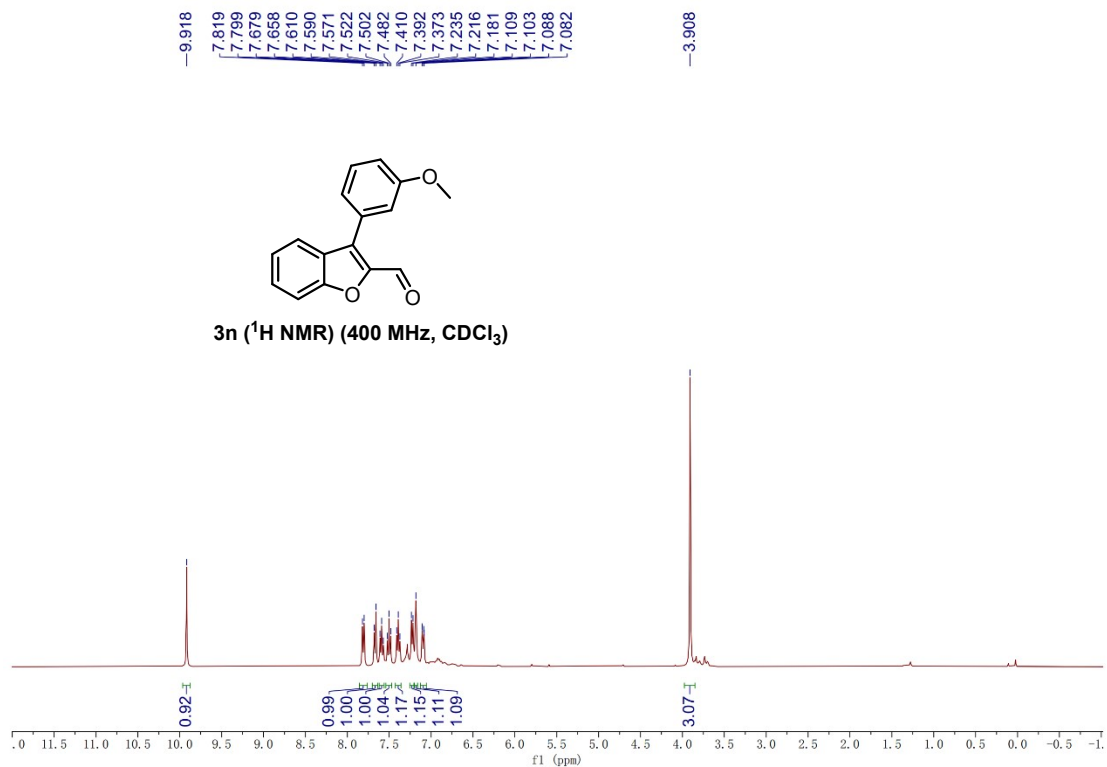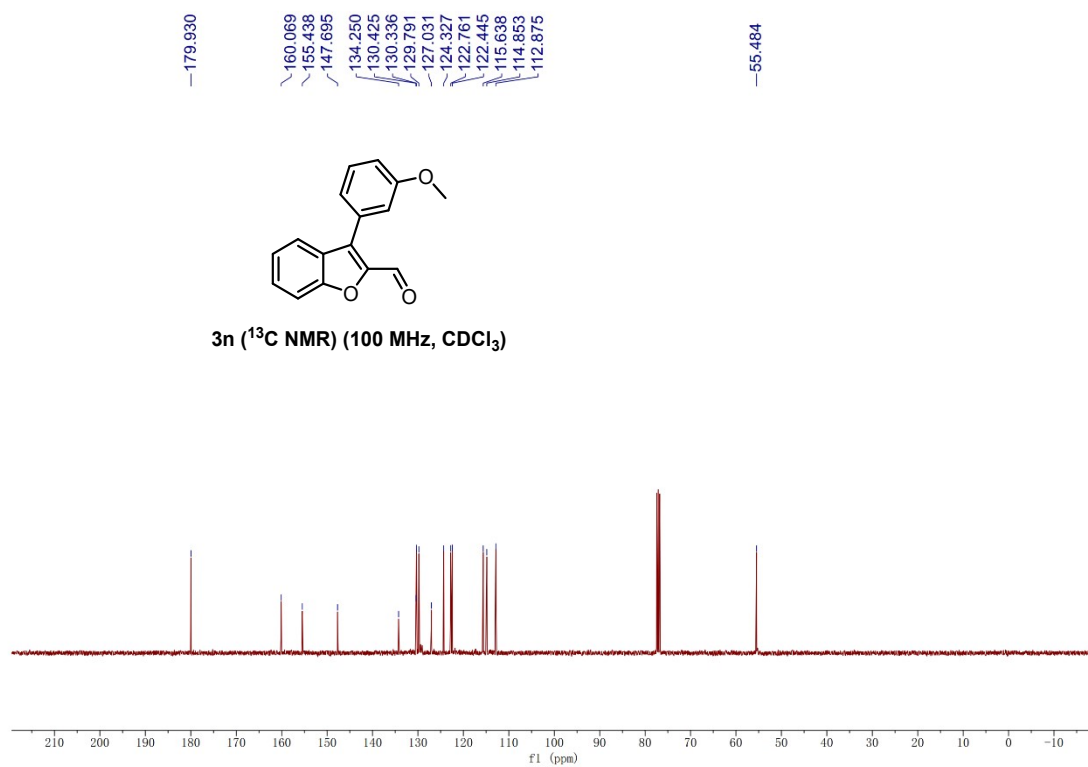



9.756  
7.692  
7.687  
7.672  
7.669  
7.645  
7.641  
7.638  
7.624  
7.620  
7.617  
7.603  
7.600  
7.586  
7.582  
7.567  
7.563  
7.523  
7.518  
7.502  
7.485  
7.479  
7.475  
7.471  
7.460  
7.453  
7.387  
7.384  
7.369  
7.366  
7.349  
7.346

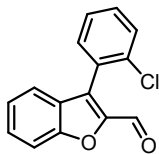

**3o** ( $^1\text{H}$  NMR) (400 MHz,  $\text{CDCl}_3$ )

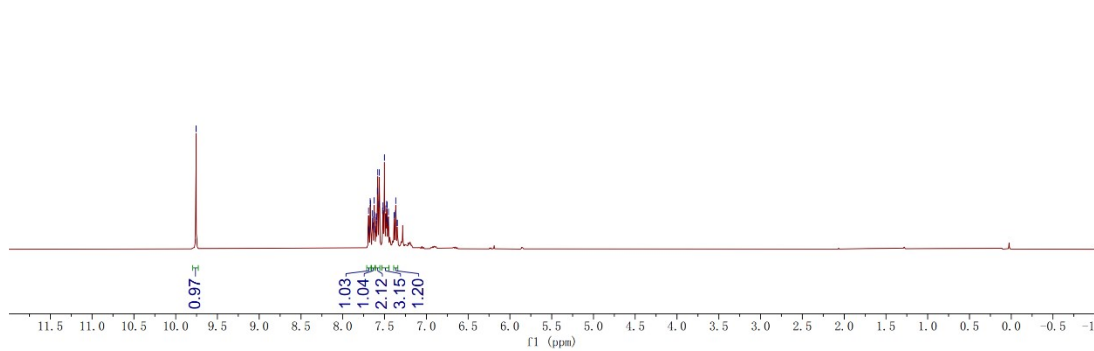

179.591  
155.293  
147.964  
134.010  
132.497  
130.926  
130.780  
130.494  
129.618  
128.286  
127.268  
127.128  
124.242  
123.104  
112.845

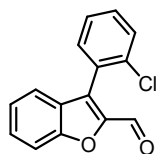

**3o** ( $^{13}\text{C}$  NMR) (100 MHz,  $\text{CDCl}_3$ )

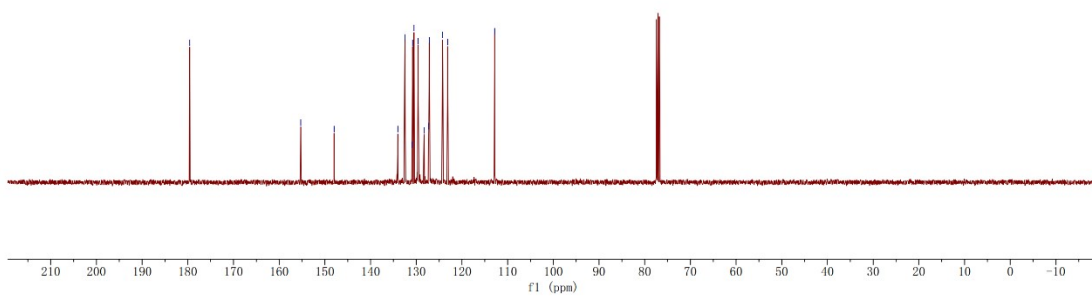

9.707  
8.071  
8.059  
8.047  
8.018  
7.997  
7.800  
7.779  
7.753  
7.732  
7.641  
7.638  
7.628  
7.620  
7.606  
7.602  
7.587  
7.584  
7.569  
7.566  
7.493  
7.490  
7.476  
7.472  
7.468  
7.455  
7.446  
7.426  
7.324  
7.307  
7.304  
7.302  
7.284

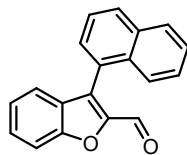

**3p** ( $^1\text{H}$  NMR) (400 MHz,  $\text{CDCl}_3$ )

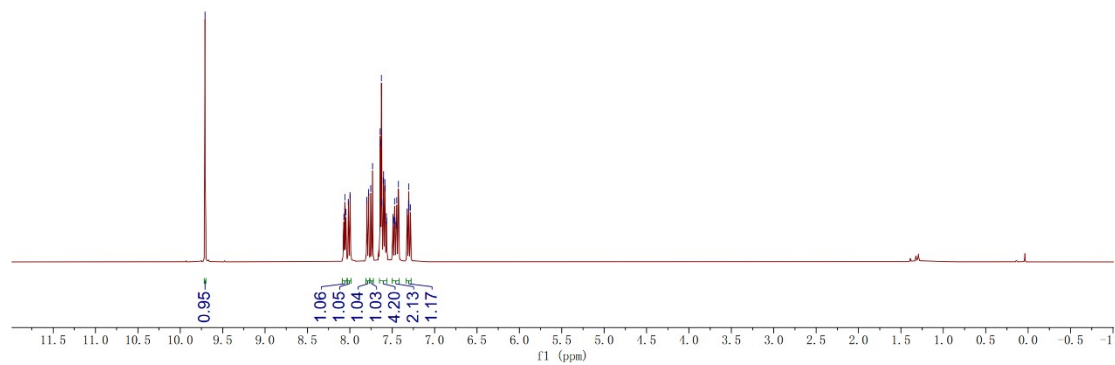

179.738  
155.315  
148.796  
138.816  
133.240  
132.131  
130.056  
129.809  
129.393  
128.651  
128.336  
127.017  
126.648  
126.415  
125.580  
125.386  
124.262  
123.311  
112.940

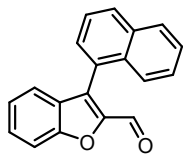

**3p** ( $^{13}\text{C}$  NMR) (100 MHz,  $\text{CDCl}_3$ )

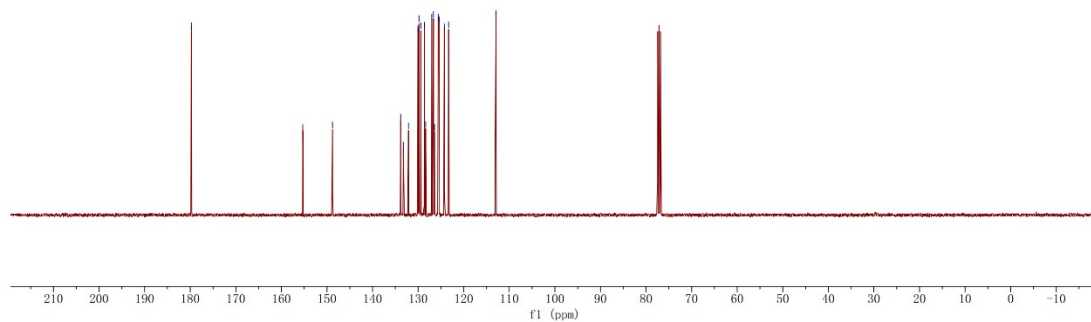

10.125  
 7.998  
 7.978  
 7.674  
 7.653  
 7.633  
 7.630  
 7.625  
 7.621  
 7.617  
 7.608  
 7.605  
 7.601  
 7.587  
 7.584  
 7.566  
 7.555  
 7.547  
 7.544  
 7.452  
 7.432  
 7.415  
 7.304  
 7.294  
 7.291  
 7.284

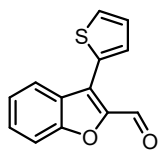

3q (<sup>1</sup>H NMR) (400 MHz, CDCl<sub>3</sub>)

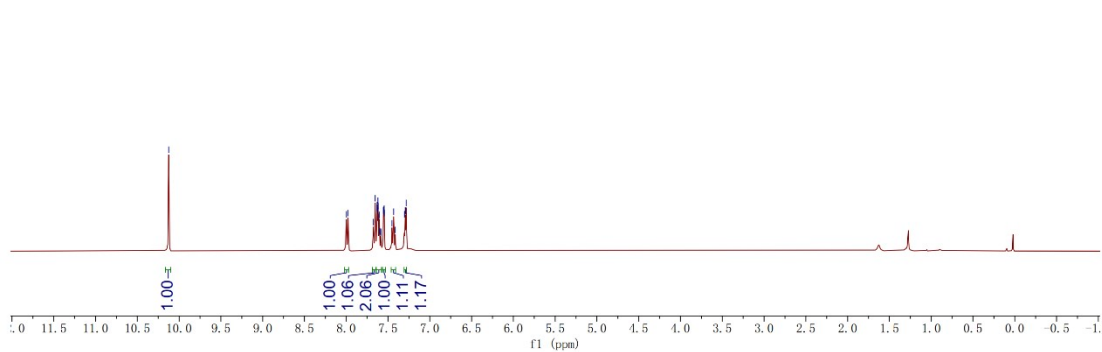

179.572  
 155.454  
 147.582  
 129.921  
 129.837  
 129.556  
 128.605  
 128.329  
 126.861  
 126.608  
 124.475  
 123.017  
 112.878

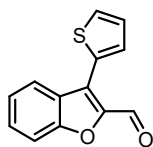

3q (<sup>13</sup>C NMR) (100 MHz, CDCl<sub>3</sub>)

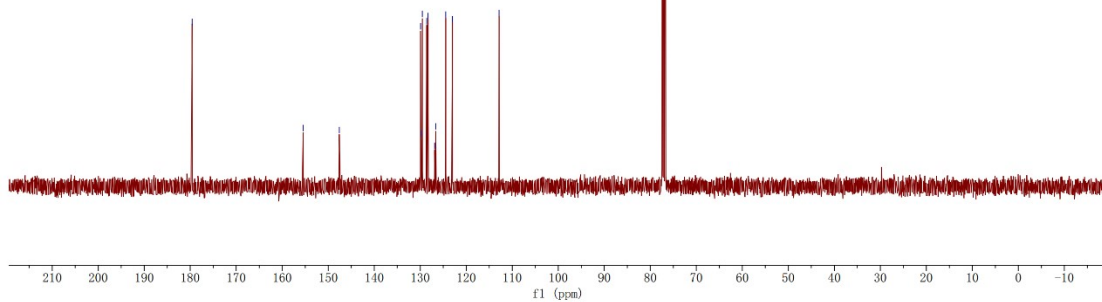

9.891  
 8.531  
 8.526  
 8.520  
 8.512  
 8.507  
 8.501  
 7.988  
 7.953  
 7.939  
 7.934  
 7.929  
 7.731  
 7.724  
 7.709  
 7.702  
 7.687  
 7.682  
 7.672  
 7.667  
 7.655  
 7.650  
 7.646  
 7.635  
 7.631  
 7.624  
 7.618  
 7.613  
 7.602  
 7.583  
 7.577  
 7.570  
 7.561

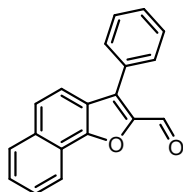

3r (<sup>1</sup>H NMR) (400 MHz, CDCl<sub>3</sub>)

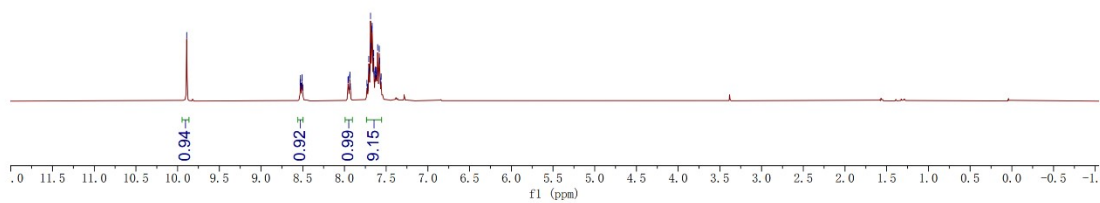

178.981  
 152.545  
 147.609  
 135.354  
 134.073  
 130.083  
 129.441  
 129.382  
 129.178  
 128.486  
 127.760  
 127.190  
 125.391  
 122.778  
 121.523  
 121.300  
 118.890

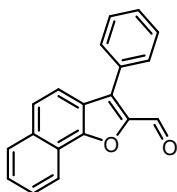

3r (<sup>13</sup>C NMR) (100 MHz, CDCl<sub>3</sub>)

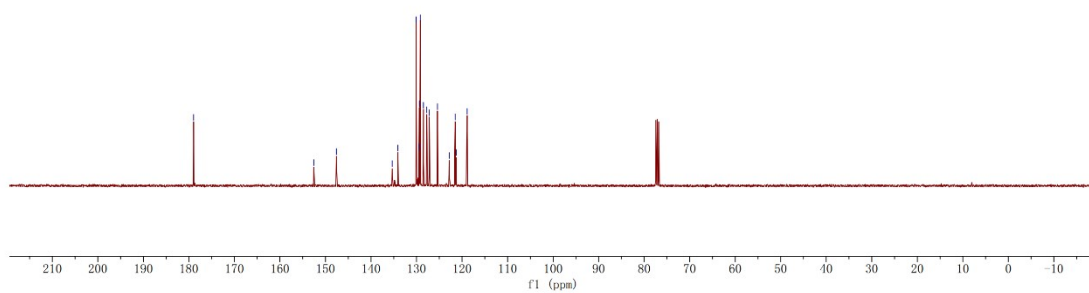

9.867  
7.623  
7.616  
7.606  
7.598  
7.584  
7.575  
7.569  
7.563  
7.556  
7.547  
7.415  
7.409  
7.395  
7.389  
7.319  
7.312  
7.297  
7.290  
7.274  
7.267

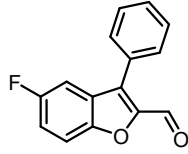

**3s (<sup>1</sup>H NMR) (400 MHz, CDCl<sub>3</sub>)**

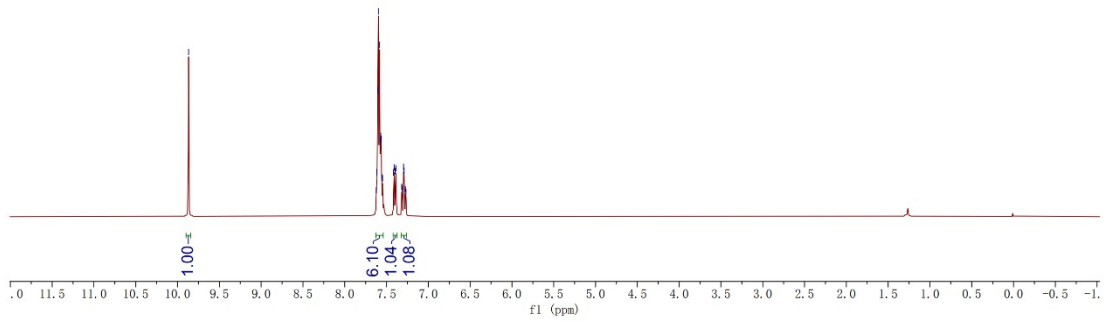

179.755  
161.028  
158.622  
151.621  
148.882  
133.979  
133.932  
129.805  
129.653  
129.338  
128.724  
127.885  
127.783  
118.218  
117.951  
113.978  
113.885  
107.834  
107.584

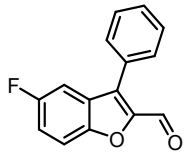

**3s (<sup>13</sup>C NMR) (100 MHz, CDCl<sub>3</sub>)**

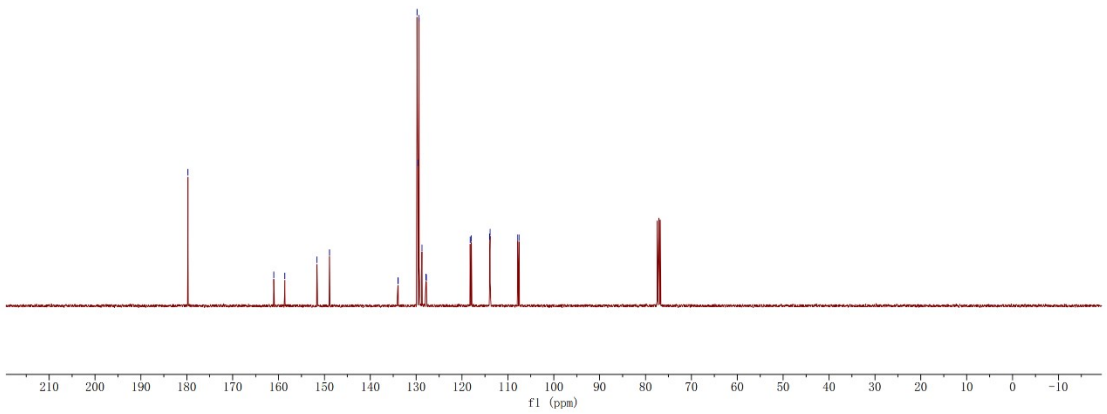

9.881  
7.739  
7.734  
7.626  
7.620  
7.617  
7.614  
7.610  
7.606  
7.596  
7.589  
7.582  
7.577  
7.573  
7.562  
7.559  
7.530  
7.525  
7.508  
7.503

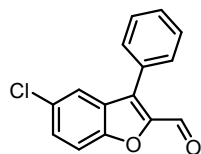

**3t (<sup>1</sup>H NMR) (400 MHz, CDCl<sub>3</sub>)**

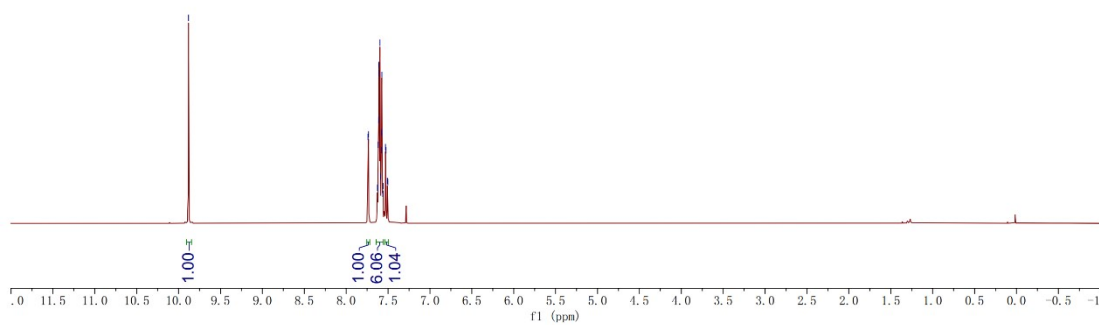

179.711  
153.688  
148.486  
133.323  
130.089  
130.018  
129.879  
129.728  
129.368  
128.545  
128.354  
122.069  
114.019

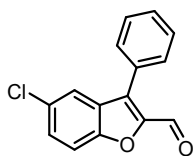

**3t (<sup>13</sup>C NMR) (100 MHz, CDCl<sub>3</sub>)**

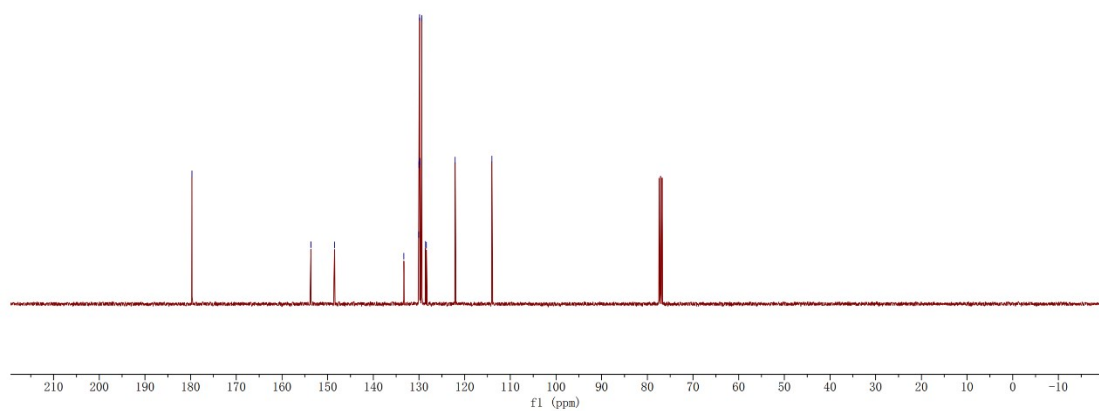

9.870  
7.883  
7.878  
7.651  
7.646  
7.629  
7.624  
7.616  
7.607  
7.601  
7.596  
7.588  
7.580  
7.574  
7.568  
7.563  
7.559  
7.555  
7.551  
7.528  
7.506

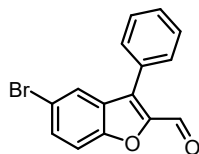

3u (<sup>1</sup>H NMR) (400 MHz, CDCl<sub>3</sub>)

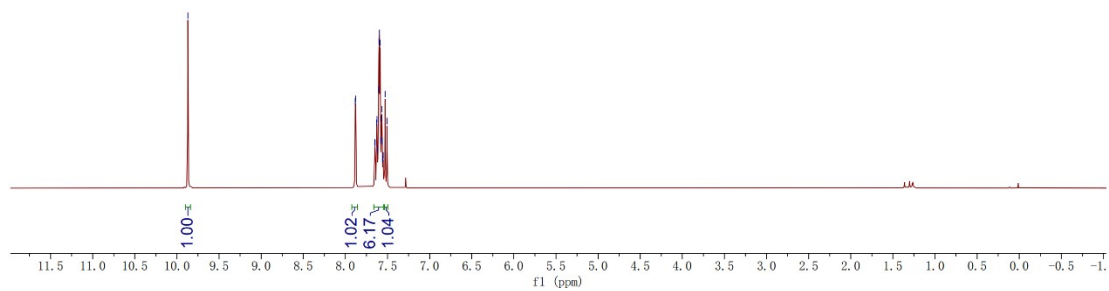

179.668  
154.027  
148.279  
133.121  
132.631  
129.893  
129.739  
129.378  
128.935  
128.505  
125.178  
117.450  
114.409

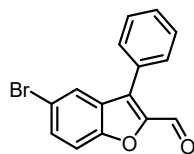

3u (<sup>13</sup>C NMR) (100 MHz, CDCl<sub>3</sub>)

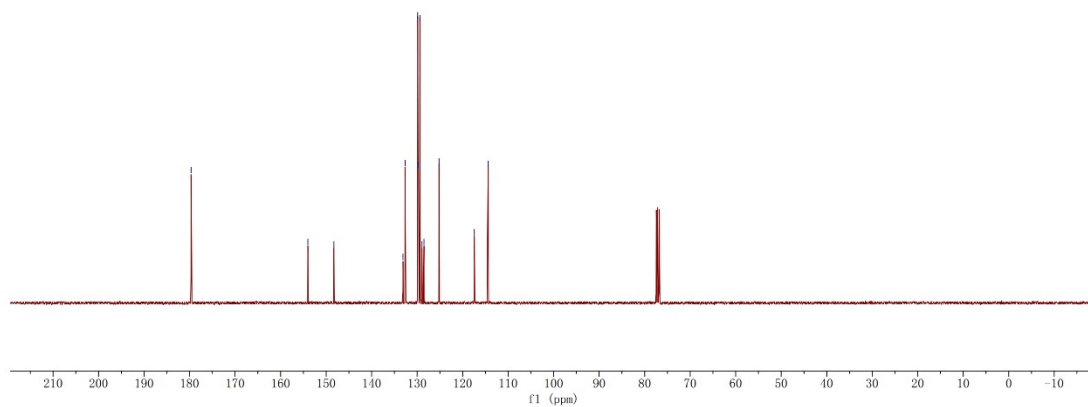

10.116  
9.955  
8.357  
8.353  
8.164  
8.160  
8.143  
8.139  
7.822  
7.800  
7.699  
7.694  
7.683  
7.679  
7.675  
7.656  
7.644  
7.641  
7.637  
7.629  
7.624  
7.618

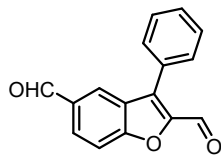

3v (<sup>1</sup>H NMR) (400 MHz, CDCl<sub>3</sub>)

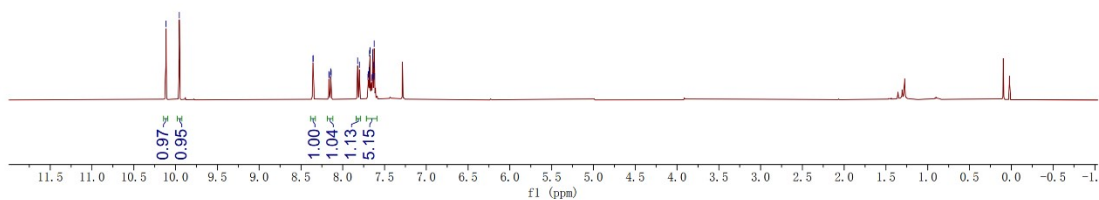

190.874  
179.601  
158.409  
148.825  
134.211  
133.389  
130.246  
129.980  
129.954  
128.266  
127.815  
126.266  
113.784

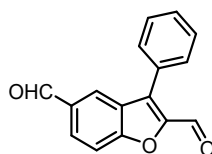

3v (<sup>13</sup>C NMR) (100 MHz, CDCl<sub>3</sub>)

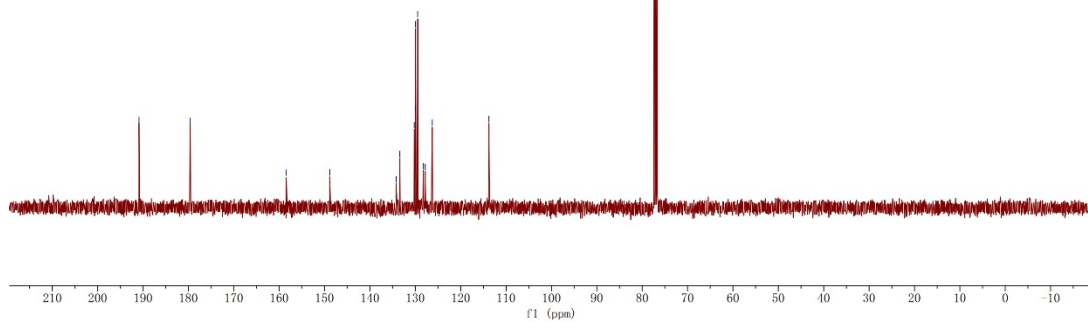



9.956  
8.170  
8.166  
8.164  
7.861  
7.857  
7.839  
7.835  
7.795  
7.793  
7.774  
7.772  
7.649  
7.644  
7.636  
7.629  
7.623  
7.619  
7.615

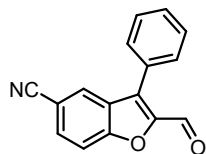

3w ( $^1\text{H}$  NMR) (400 MHz,  $\text{CDCl}_3$ )

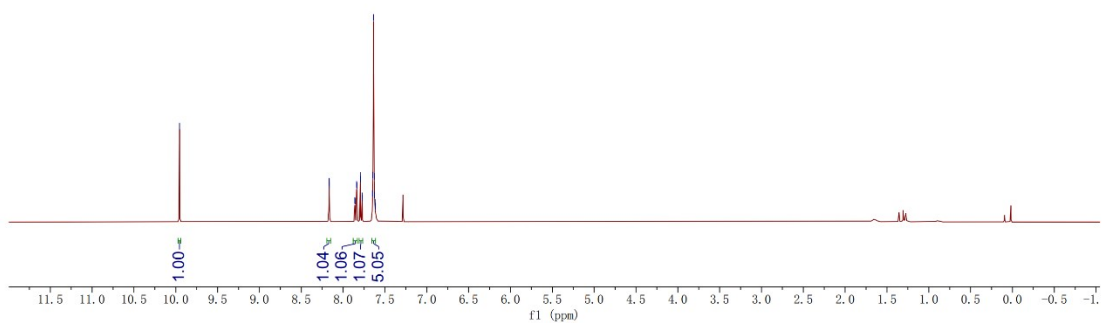

179.514  
156.661  
148.836  
133.079  
132.358  
130.163  
129.854  
129.584  
128.202  
127.877  
127.786  
118.415  
114.297  
108.613

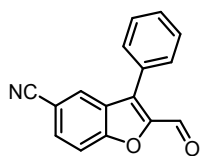

3w ( $^{13}\text{C}$  NMR) (100 MHz,  $\text{CDCl}_3$ )

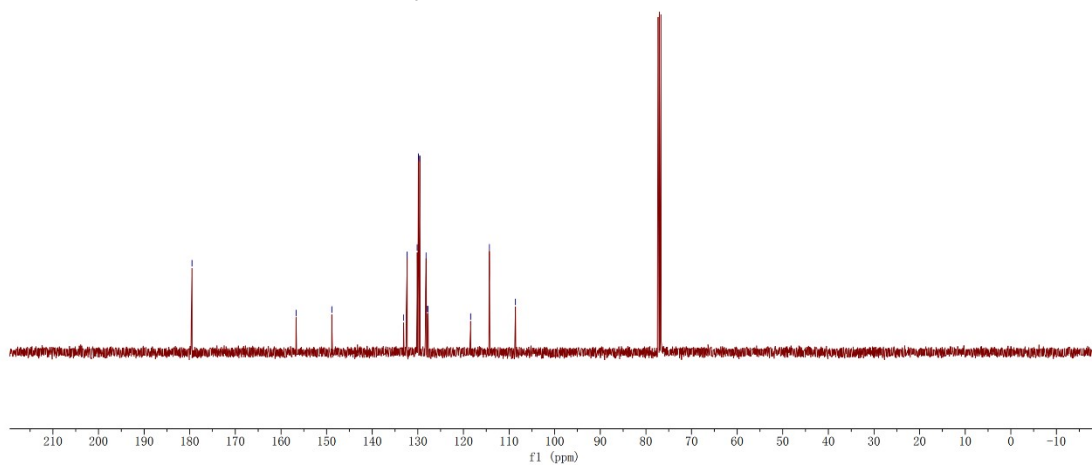

-9.923  
 8.519  
 8.515  
 8.297  
 8.292  
 8.275  
 8.270  
 7.710  
 7.688  
 7.683  
 7.677  
 7.673  
 7.667  
 7.663  
 7.658  
 7.653  
 7.645  
 7.639  
 7.634  
 7.624  
 7.609  
 7.605  
 7.599  
 7.597  
 7.589  
 7.587  
 3.966

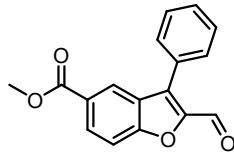

3x (<sup>1</sup>H NMR) (400 MHz, CDCl<sub>3</sub>)

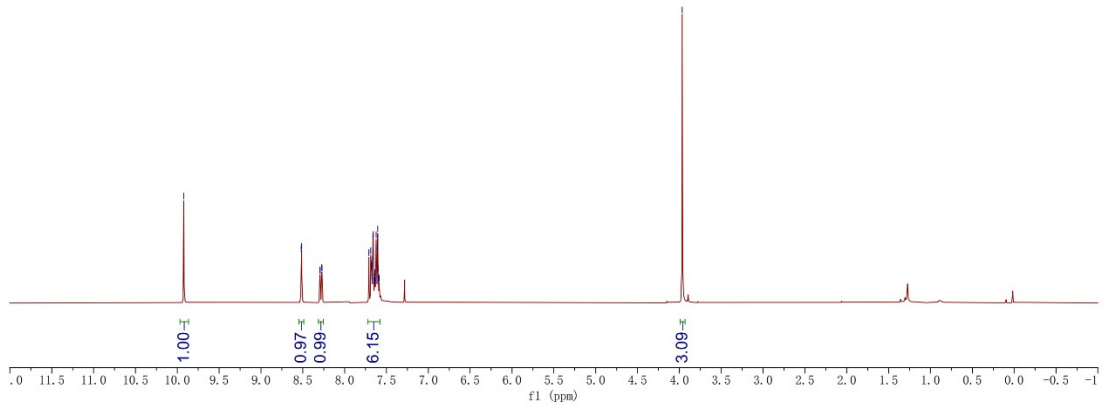

-179.674  
 -166.440  
 -157.685  
 -148.577  
 -134.338  
 -130.877  
 -130.010  
 -129.794  
 -129.388  
 -128.490  
 -127.204  
 -126.799  
 -125.360  
 -112.826  
 -52.400

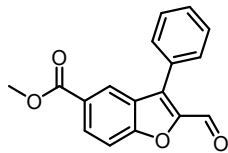

3x (<sup>13</sup>C NMR) (100 MHz, CDCl<sub>3</sub>)

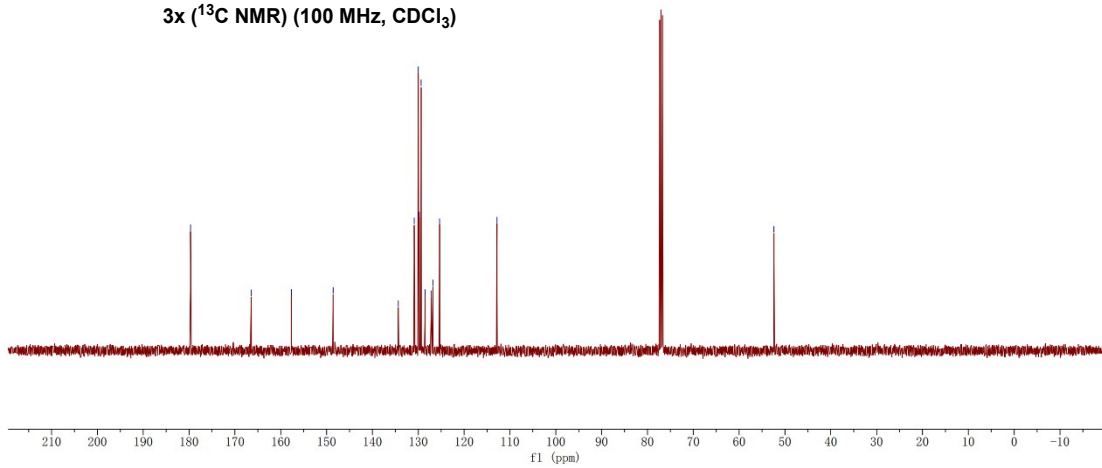

9.868  
7.661  
7.656  
7.651  
7.645  
7.641  
7.637  
7.631  
7.622  
7.616  
7.610  
7.606  
7.595  
7.589  
7.579  
7.575  
7.569  
7.560  
7.553  
7.539  
7.416  
7.411  
7.393  
7.389

2.485

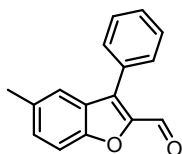

3y (<sup>1</sup>H NMR) (400 MHz, CDCl<sub>3</sub>)

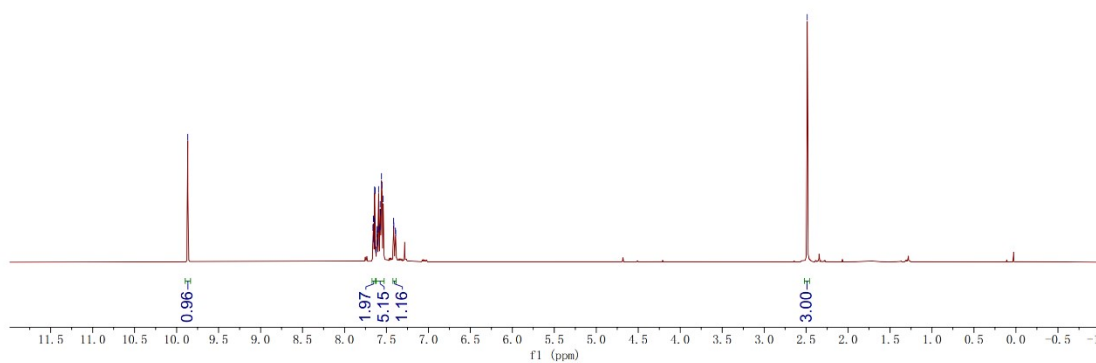

179.841  
154.024  
147.873  
134.166  
134.053  
131.380  
130.004  
129.412  
129.349  
129.161  
127.145  
122.018  
112.382

21.387

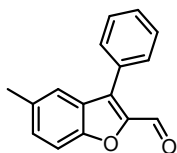

3y (<sup>13</sup>C NMR) (100 MHz, CDCl<sub>3</sub>)

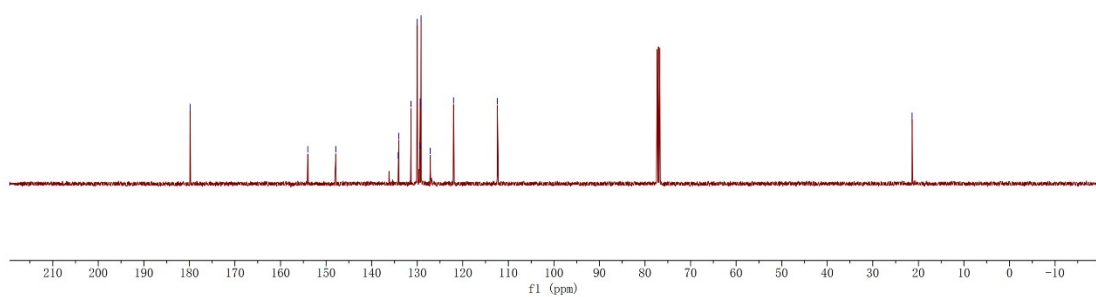

9.869  
7.670  
7.665  
7.660  
7.654  
7.649  
7.646  
7.621  
7.616  
7.611  
7.605  
7.602  
7.599  
7.595  
7.588  
7.581  
7.577  
7.573  
7.567  
7.556  
7.450  
7.446  
7.428  
7.424

2.810  
2.791  
2.772  
2.753

1.315  
1.296  
1.277

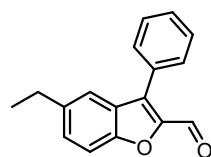

3z ( $^1\text{H NMR}$ ) (400 MHz,  $\text{CDCl}_3$ )

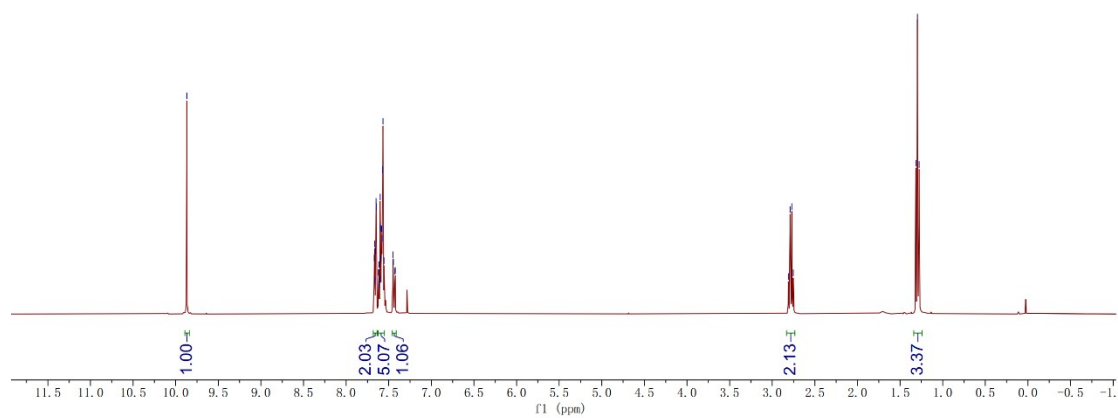

179.835  
154.159  
147.925  
140.634  
134.293  
130.415  
130.016  
129.445  
129.346  
129.175  
127.136  
120.815  
112.528

28.881  
16.129

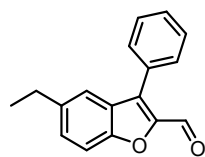

3z ( $^{13}\text{C NMR}$ ) (100 MHz,  $\text{CDCl}_3$ )

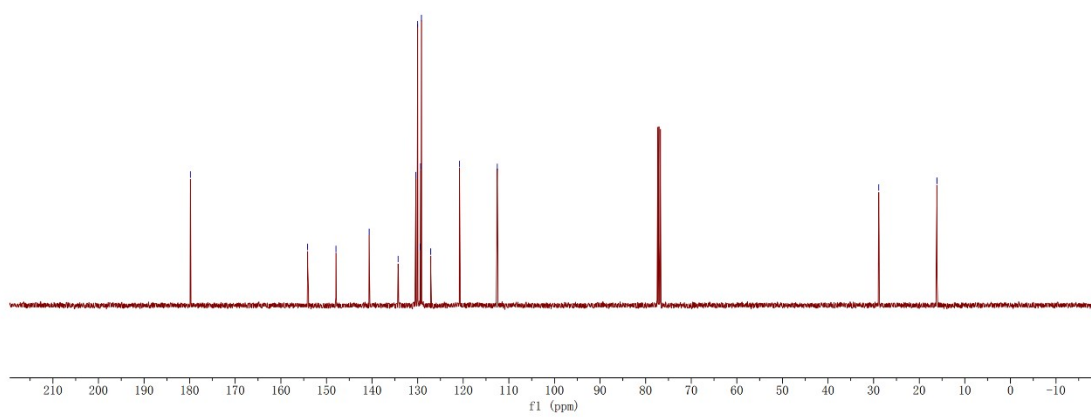

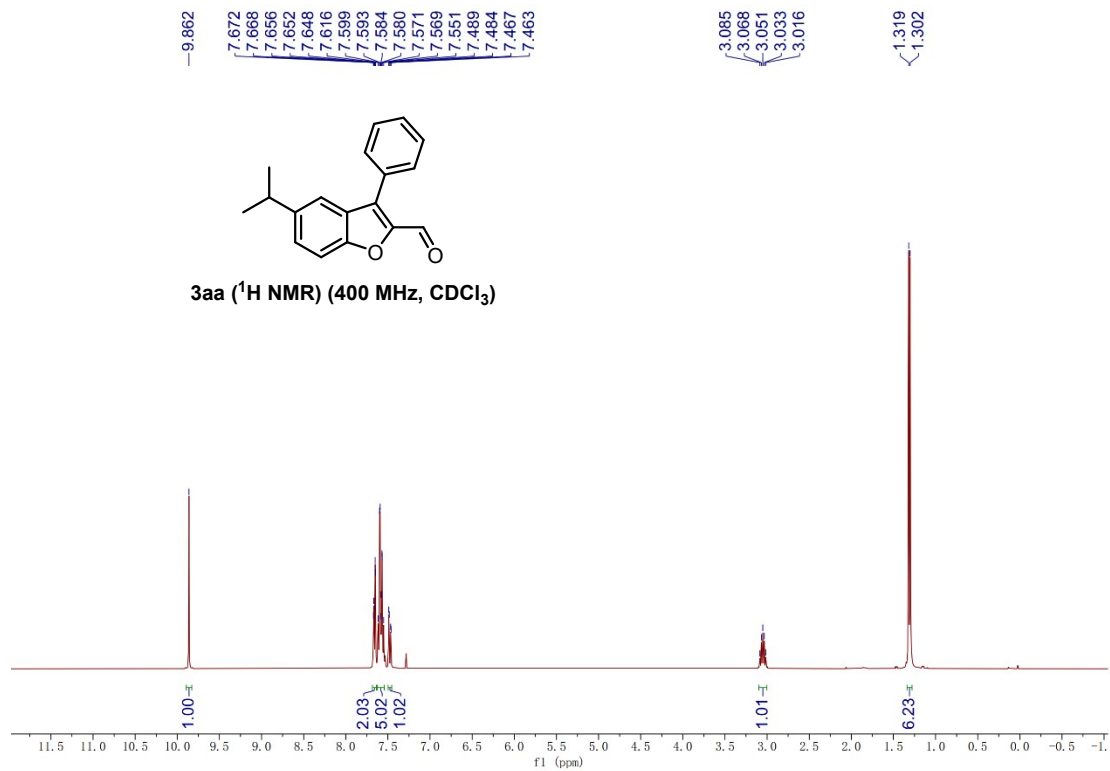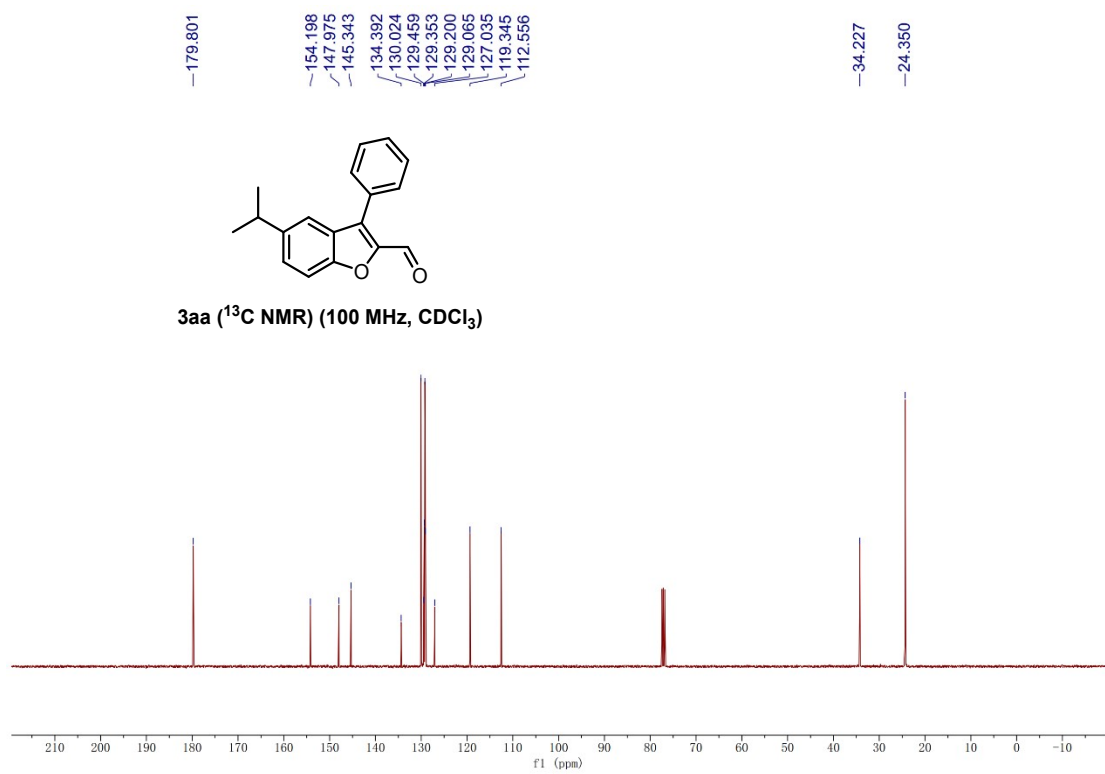

-9.833  
 7.650  
 7.645  
 7.633  
 7.630  
 7.626  
 7.615  
 7.612  
 7.595  
 7.576  
 7.569  
 7.558  
 7.552  
 7.536  
 7.210  
 7.203  
 7.187  
 7.181  
 7.123  
 7.117  
 -3.850

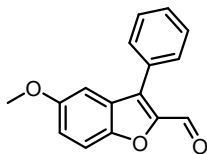

3ab (<sup>1</sup>H NMR) (400 MHz, CDCl<sub>3</sub>)

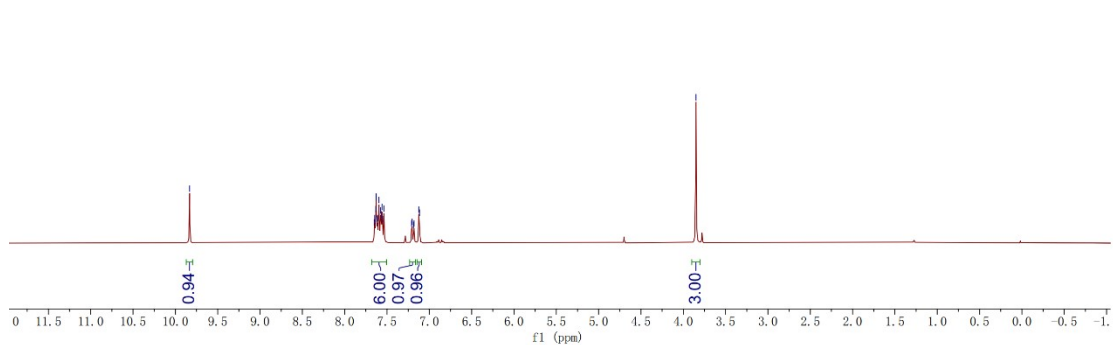

-179.737  
 157.036  
 150.624  
 148.400  
 134.249  
 129.885  
 129.371  
 129.247  
 127.505  
 120.046  
 114.654  
 113.583  
 102.977  
 -55.947

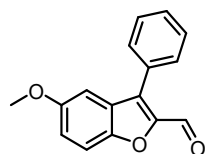

3ab (<sup>13</sup>C NMR) (100 MHz, CDCl<sub>3</sub>)

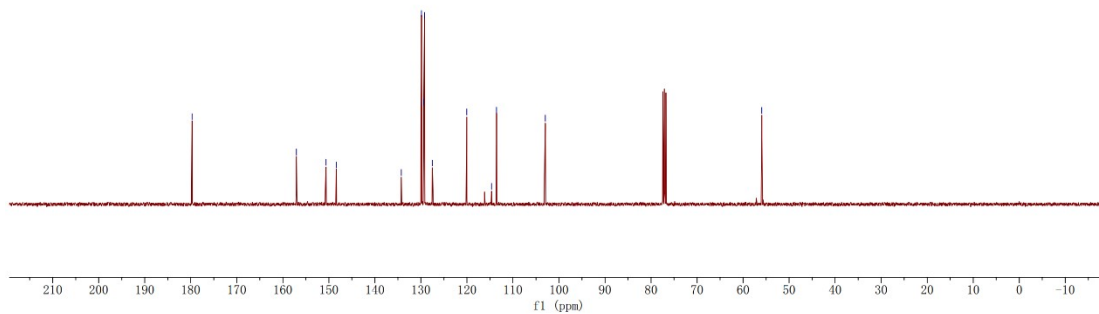

9.915  
7.661  
7.655  
7.645  
7.641  
7.637  
7.621  
7.615  
7.600  
7.587  
7.571  
7.566  
7.559  
7.554  
7.548  
7.330  
7.318  
7.306  
7.300

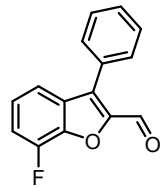

**3ac (<sup>1</sup>H NMR) (400 MHz, CDCl<sub>3</sub>)**

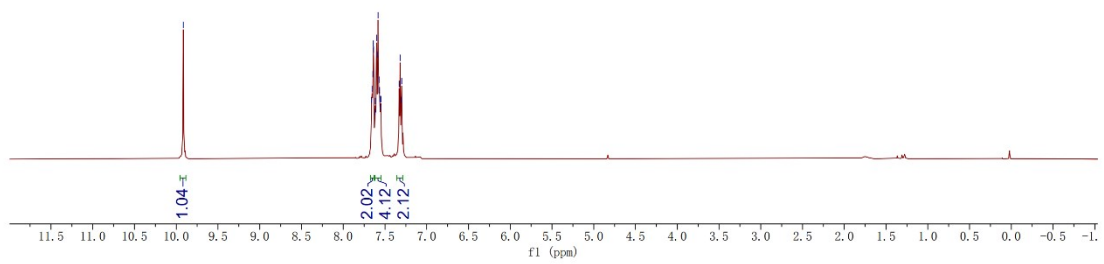

179.593  
149.755  
148.226  
147.235  
142.946  
142.827  
133.932  
133.907  
130.567  
130.540  
129.956  
129.722  
129.279  
128.665  
124.880  
124.625  
118.273  
118.229  
115.438  
115.281

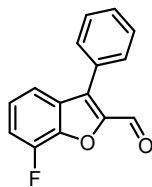

**3ac (<sup>13</sup>C NMR) (100 MHz, CDCl<sub>3</sub>)**

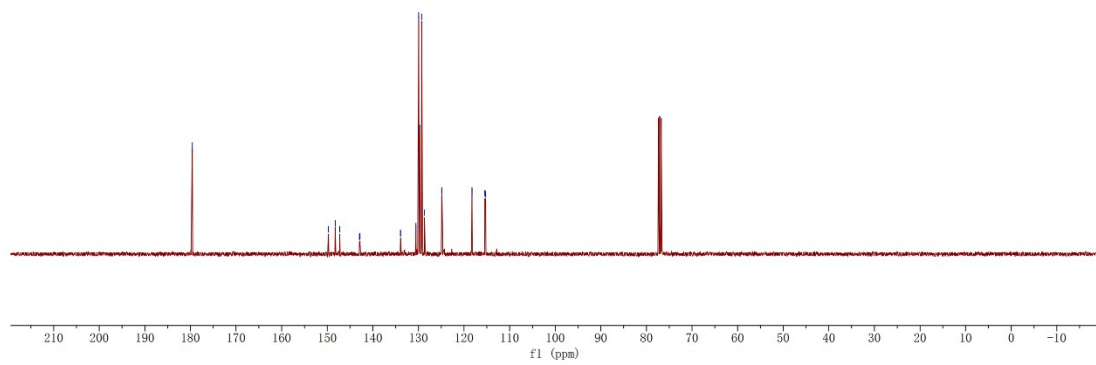

7.566  
7.562  
7.549  
7.545  
7.541  
7.528  
7.524  
7.497  
7.487  
7.482  
7.474  
7.470  
7.461  
7.415  
7.412  
7.394  
7.391  
7.359  
7.355  
7.351  
7.344  
7.339  
7.334  
7.216  
7.213  
7.208  
7.203  
7.199  
7.192  
7.173  
7.157  
7.154  
7.099  
7.095  
7.079  
7.075

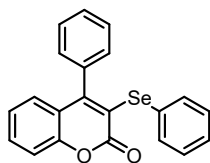

4a ( $^1\text{H}$  NMR) (400 MHz,  $\text{CDCl}_3$ )

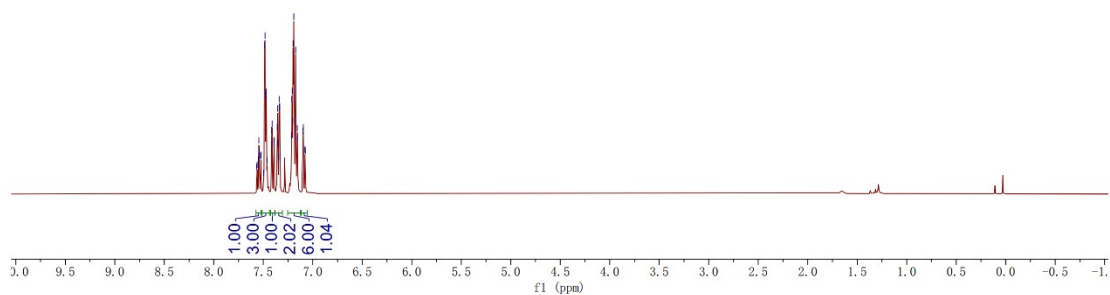

159.580  
159.066  
153.492  
136.222  
132.839  
132.065  
130.332  
129.081  
128.915  
128.536  
128.268  
127.968  
127.450  
124.317  
120.745  
120.516  
116.816

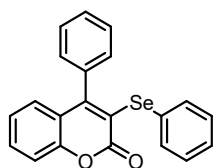

4a ( $^{13}\text{C}$  NMR) (100 MHz,  $\text{CDCl}_3$ )

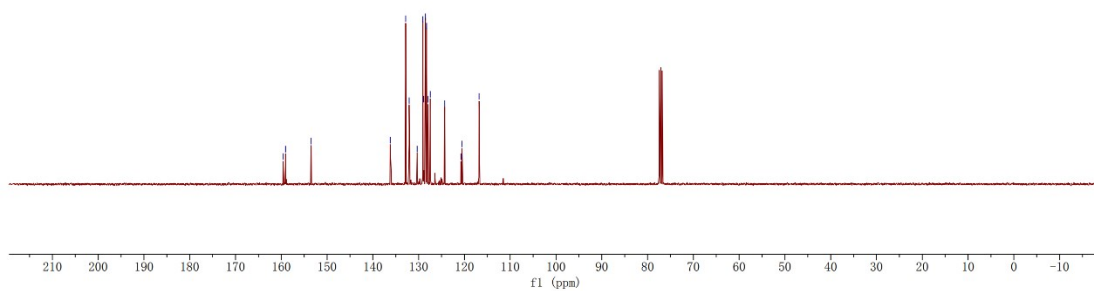



7.561  
7.556  
7.544  
7.539  
7.535  
7.523  
7.518  
7.404  
7.384  
7.367  
7.363  
7.348  
7.343  
7.299  
7.279  
7.216  
7.197  
7.177  
7.156  
7.146  
7.141  
7.117  
7.098

-2.469

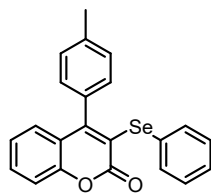

4b (<sup>1</sup>H NMR) (400 MHz, CDCl<sub>3</sub>)

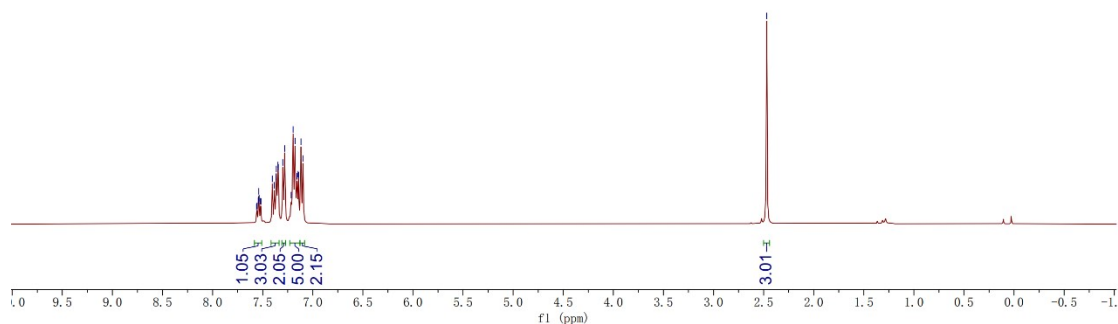

159.568  
159.300  
153.470  
138.942  
133.321  
132.667  
131.994  
130.415  
129.199  
129.027  
128.234  
128.080  
127.377  
124.254  
120.603  
120.575  
116.797

-21.506

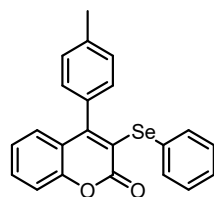

4b (<sup>13</sup>C NMR) (100 MHz, CDCl<sub>3</sub>)

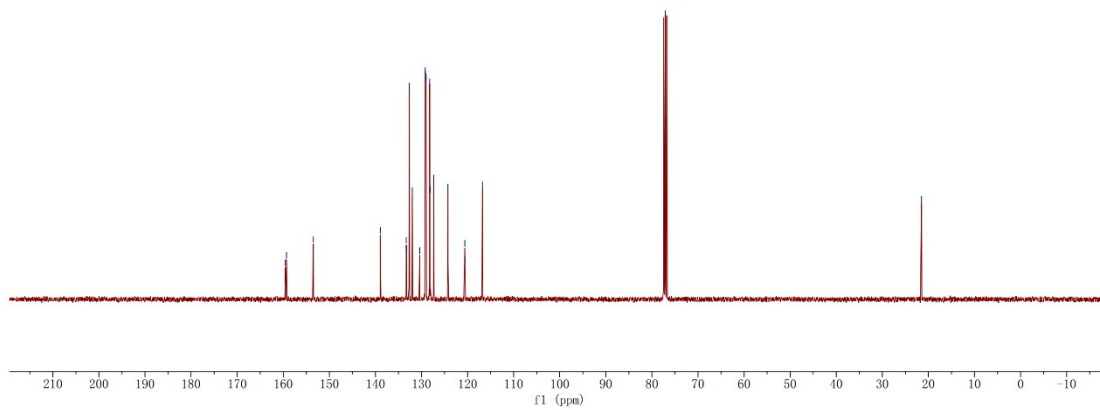

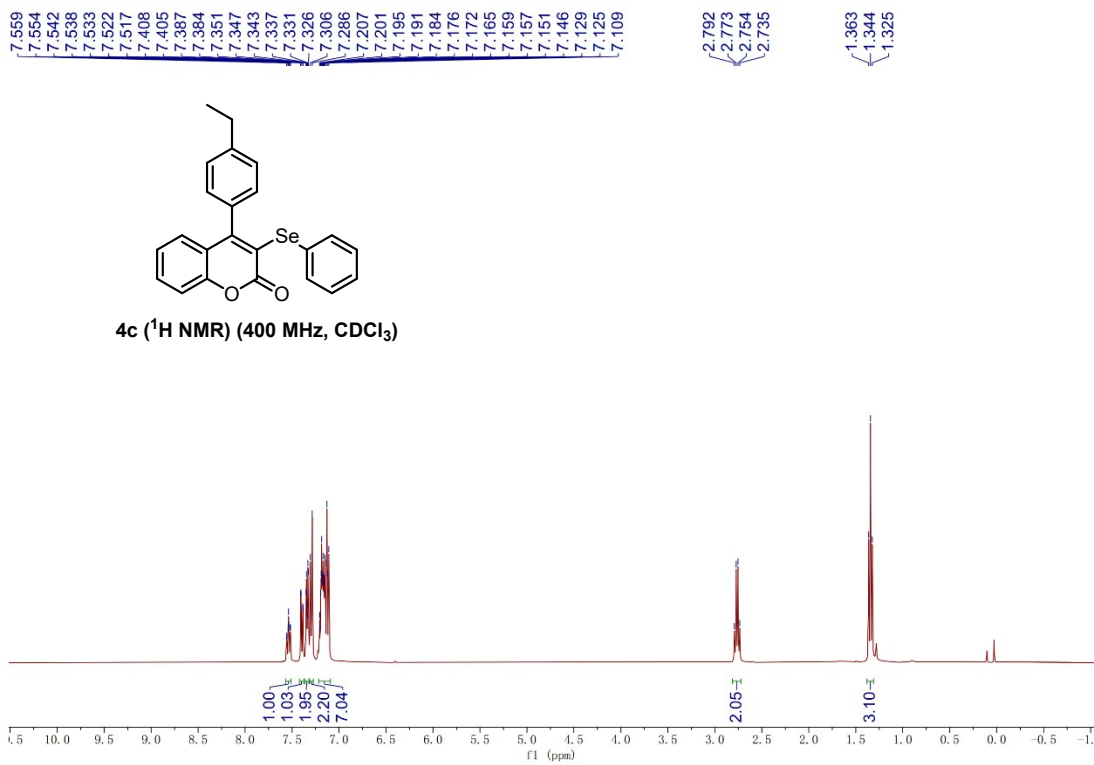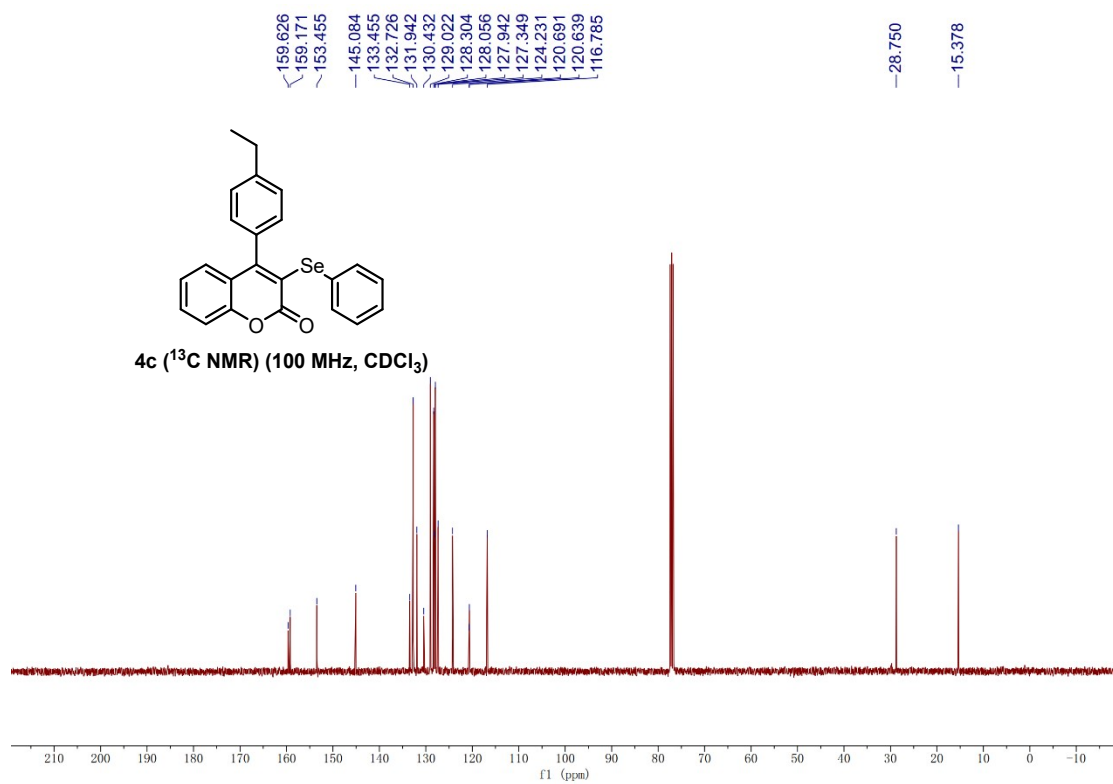

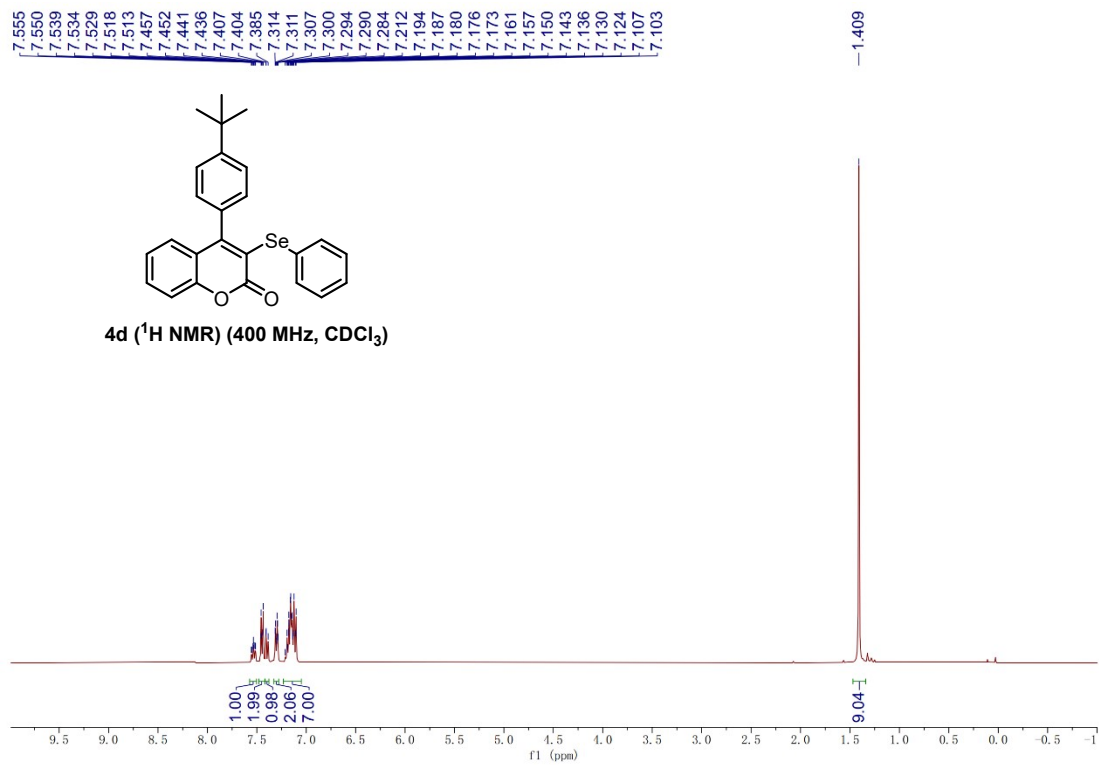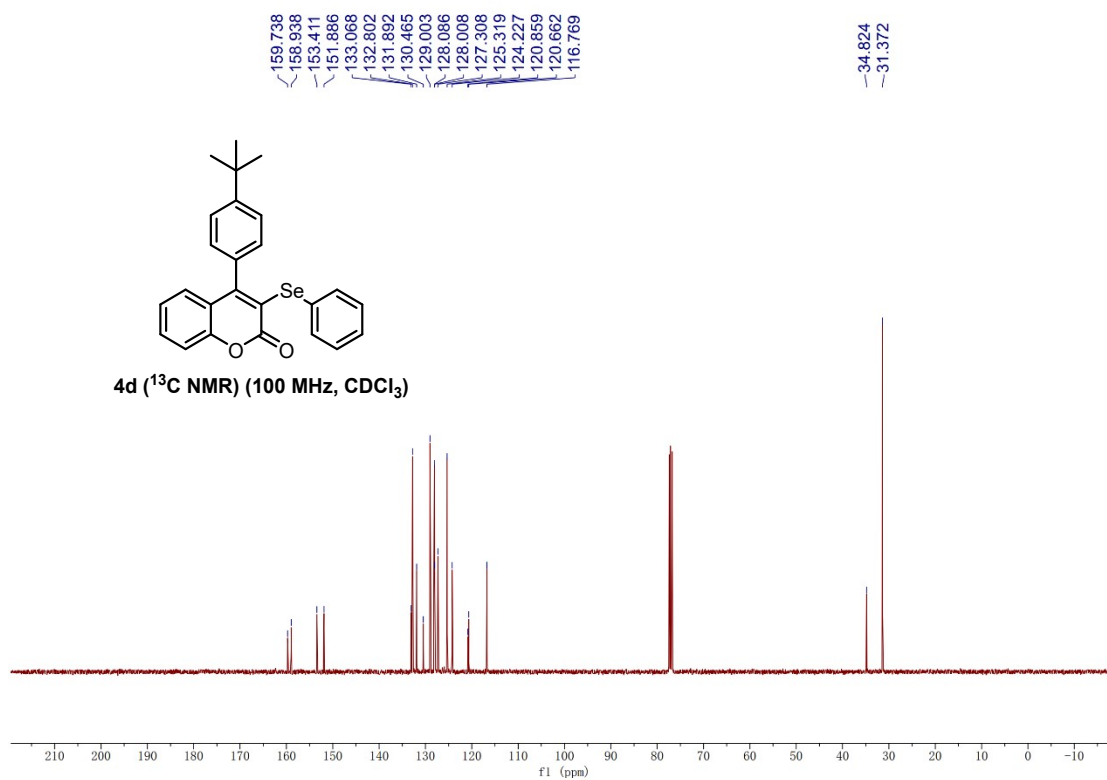

7.696  
7.692  
7.673  
7.657  
7.652  
7.583  
7.576  
7.568  
7.555  
7.546  
7.540  
7.527  
7.507  
7.459  
7.455  
7.452  
7.436  
7.415  
7.353  
7.350  
7.347  
7.339  
7.333  
7.329  
7.265  
7.260  
7.249  
7.244  
7.224  
7.218  
7.212  
7.204  
7.200  
7.193  
7.187  
7.173  
7.169  
7.159  
7.154  
7.141  
7.137  
7.133

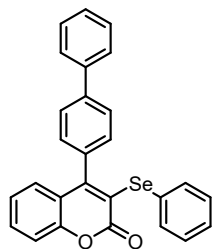

4e ( $^1\text{H NMR}$ ) (400 MHz,  $\text{CDCl}_3$ )

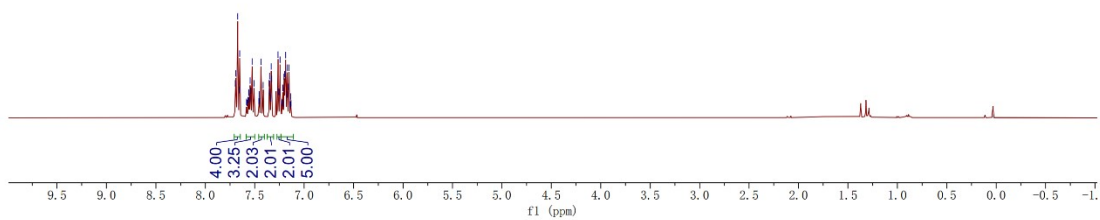

159.703  
158.431  
153.444  
141.622  
140.275  
134.935  
133.053  
132.026  
130.295  
129.047  
128.886  
128.857  
127.844  
127.827  
127.461  
127.162  
127.117  
124.351  
121.102  
120.533  
116.878

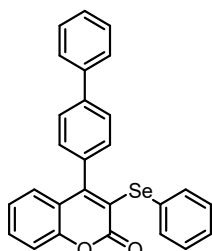

4e ( $^{13}\text{C NMR}$ ) (100 MHz,  $\text{CDCl}_3$ )

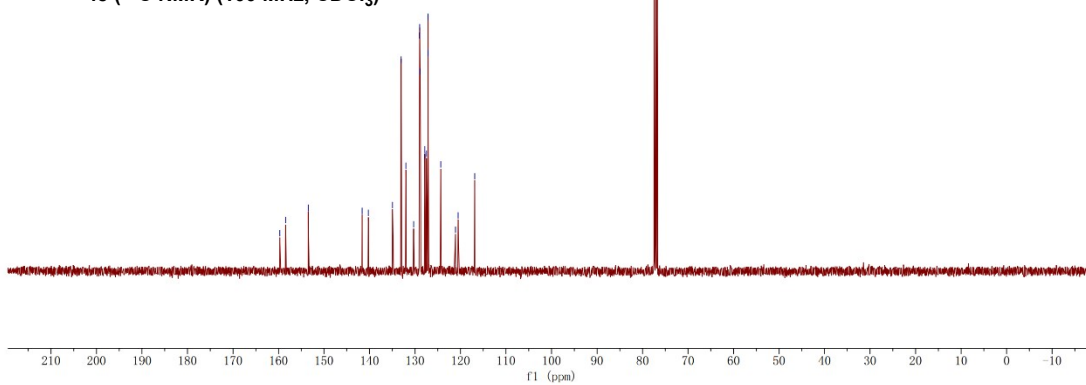

7.575  
7.571  
7.553  
7.536  
7.532  
7.416  
7.394  
7.321  
7.304  
7.299  
7.237  
7.219  
7.204  
7.186  
7.168  
7.153  
7.140  
7.131  
7.109  
7.074  
7.070  
7.054  
7.050

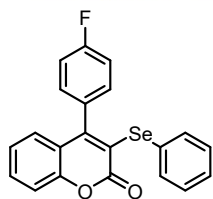

4f (<sup>1</sup>H NMR) (400 MHz, CDCl<sub>3</sub>)

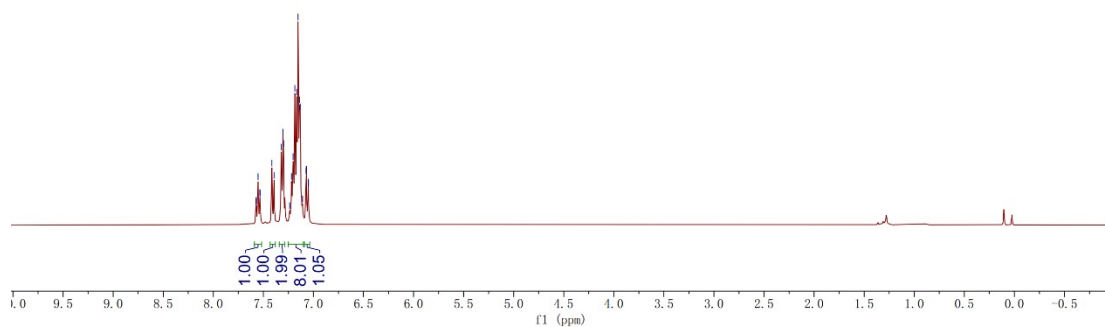

164.052  
161.575  
159.573  
157.719  
153.393  
132.977  
132.153  
132.000  
131.964  
130.347  
130.265  
130.155  
129.117  
127.595  
127.580  
124.410  
121.523  
120.446  
116.924  
115.811  
115.595

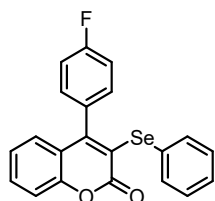

4f (<sup>13</sup>C NMR) (100 MHz, CDCl<sub>3</sub>)

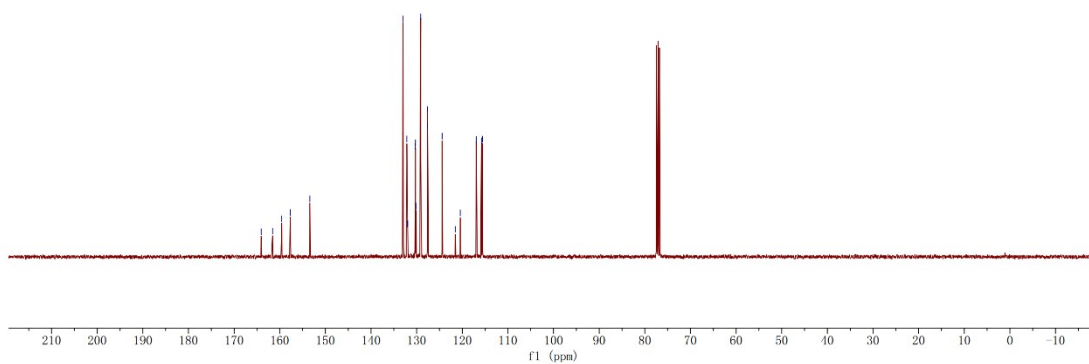

7.577  
7.573  
7.555  
7.551  
7.538  
7.534  
7.418  
7.397  
7.316  
7.299  
7.295  
7.284  
7.247  
7.243  
7.236  
7.227  
7.210  
7.201  
7.188  
7.185  
7.181  
7.169  
7.163  
7.152  
7.149  
7.114  
7.094  
7.058  
7.055  
7.039  
7.034

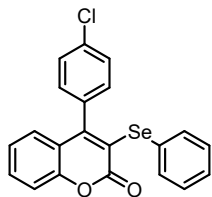

4g (<sup>1</sup>H NMR) (400 MHz, CDCl<sub>3</sub>)

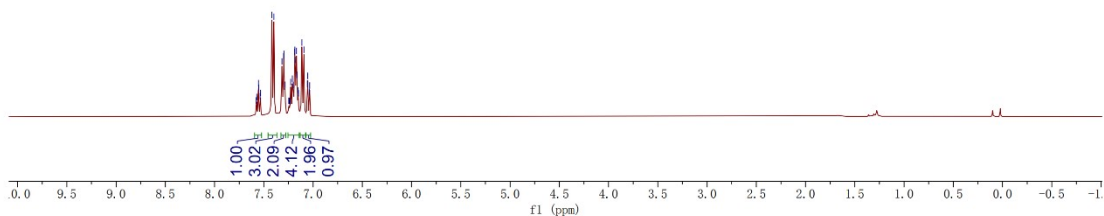

159.529  
157.381  
153.385  
134.370  
134.366  
133.167  
133.109  
133.050  
132.186  
130.038  
129.754  
128.827  
127.649  
127.461  
124.437  
121.465  
120.246  
116.955

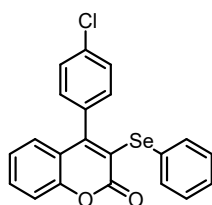

4g (<sup>13</sup>C NMR) (100 MHz, CDCl<sub>3</sub>)

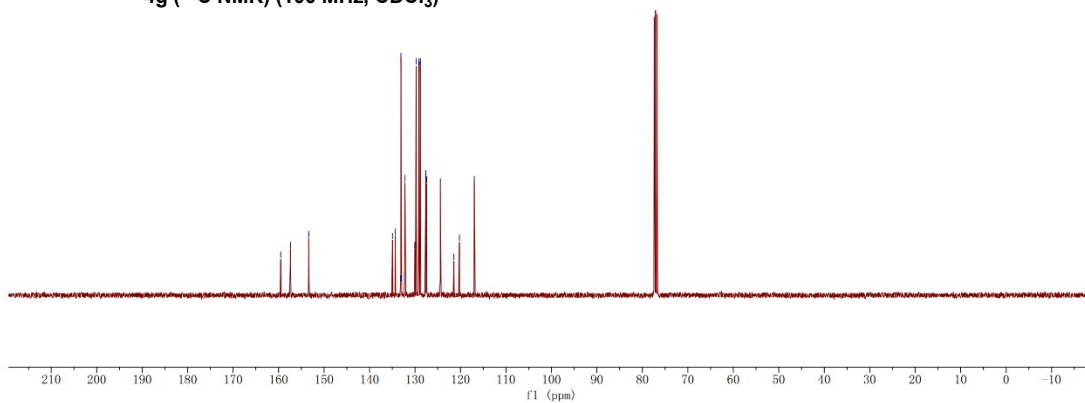

7.569  
7.564  
7.553  
7.549  
7.534  
7.530  
7.414  
7.411  
7.393  
7.390  
7.314  
7.310  
7.306  
7.299  
7.294  
7.289  
7.246  
7.228  
7.213  
7.210  
7.206  
7.201  
7.198  
7.187  
7.181  
7.173  
7.168  
7.162  
7.159  
7.151  
7.055  
7.049  
7.044  
7.035  
7.032  
7.028

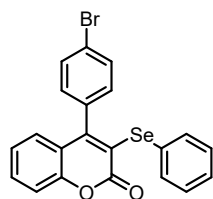

4h (<sup>1</sup>H NMR) (400 MHz, CDCl<sub>3</sub>)

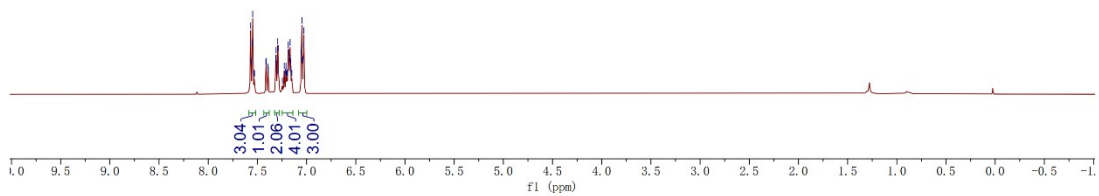

159.536  
157.338  
153.370  
134.822  
133.142  
132.208  
131.763  
129.999  
129.141  
127.664  
127.448  
124.461  
123.196  
121.407  
120.166  
116.958

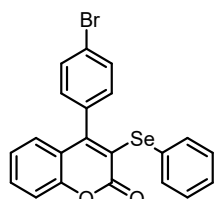

4h (<sup>13</sup>C NMR) (100 MHz, CDCl<sub>3</sub>)

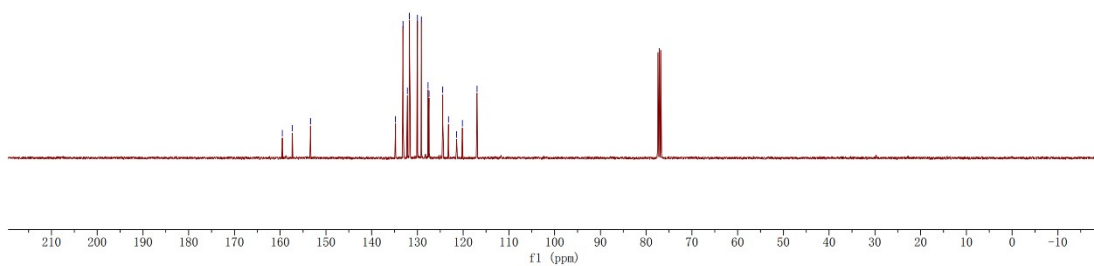

7.676  
7.656  
7.588  
7.585  
7.567  
7.549  
7.545  
7.437  
7.417  
7.284  
7.279  
7.270  
7.259  
7.253  
7.249  
7.235  
7.223  
7.216  
7.199  
7.181  
7.162  
7.153  
7.134  
7.116  
6.972  
6.956  
6.952

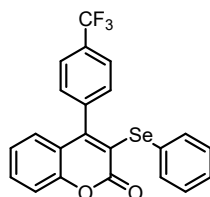

4i (<sup>1</sup>H NMR) (400 MHz, CDCl<sub>3</sub>)

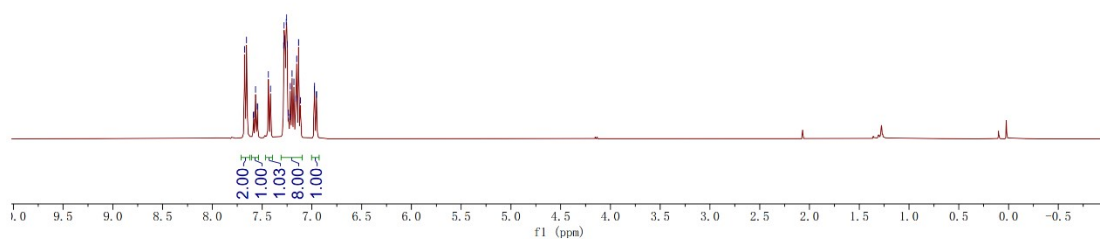

159.517  
156.827  
153.350  
139.415  
133.374  
132.253  
131.292  
130.968  
130.644  
130.320  
129.797  
129.183  
128.827  
127.755  
127.121  
125.574  
125.537  
125.500  
125.463  
125.196  
124.523  
122.488  
121.824  
120.064  
117.032

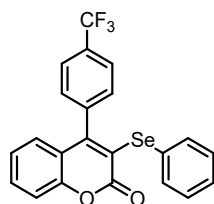

4i (<sup>13</sup>C NMR) (100 MHz, CDCl<sub>3</sub>)

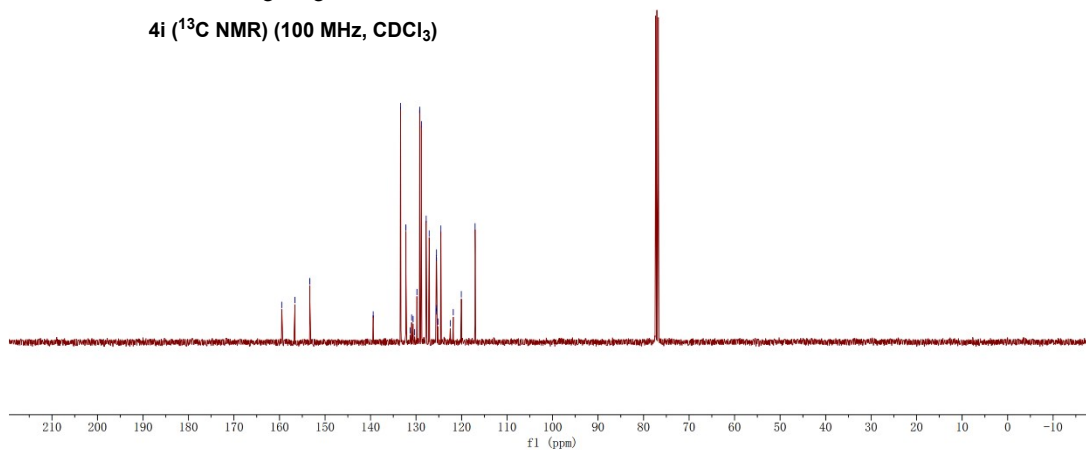



8.134  
8.129  
8.124  
8.113  
8.108  
8.104  
7.578  
7.574  
7.560  
7.556  
7.553  
7.539  
7.535  
7.424  
7.421  
7.403  
7.400  
7.316  
7.319  
7.313  
7.305  
7.299  
7.295  
7.270  
7.266  
7.261  
7.249  
7.245  
7.220  
7.205  
7.202  
7.198  
7.188  
7.185  
7.171  
7.167  
7.156  
7.152  
7.147  
7.135  
7.131  
6.988  
6.984  
6.968  
6.964  
3.997

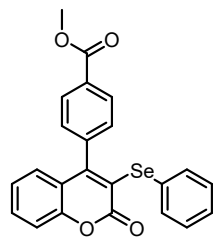

4j (<sup>1</sup>H NMR) (400 MHz, CDCl<sub>3</sub>)

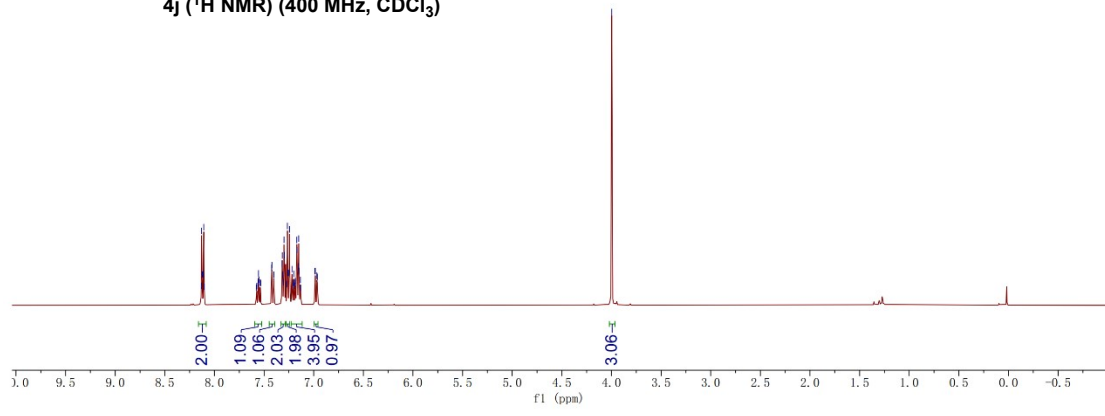

166.485  
159.461  
157.799  
153.442  
140.541  
133.128  
132.279  
130.463  
129.949  
129.794  
129.164  
128.454  
127.706  
127.439  
124.468  
121.081  
120.057  
116.980

—52.454

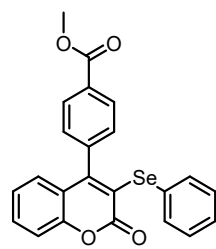

4j (<sup>13</sup>C NMR) (100 MHz, CDCl<sub>3</sub>)

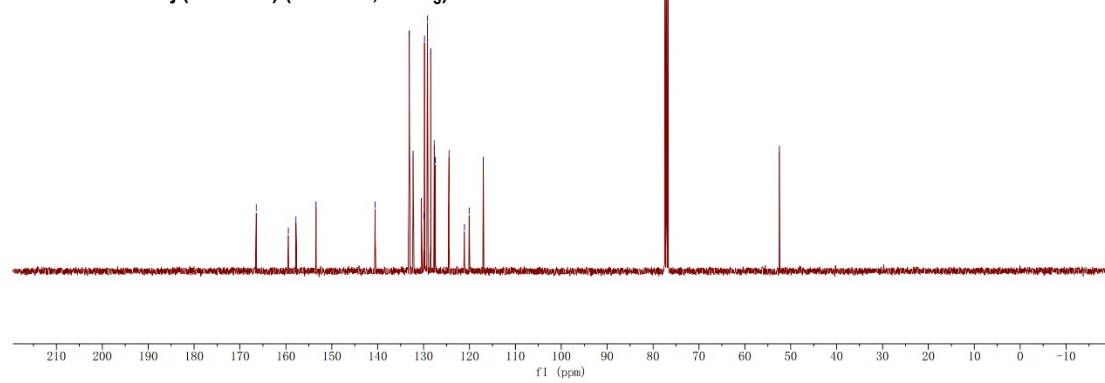

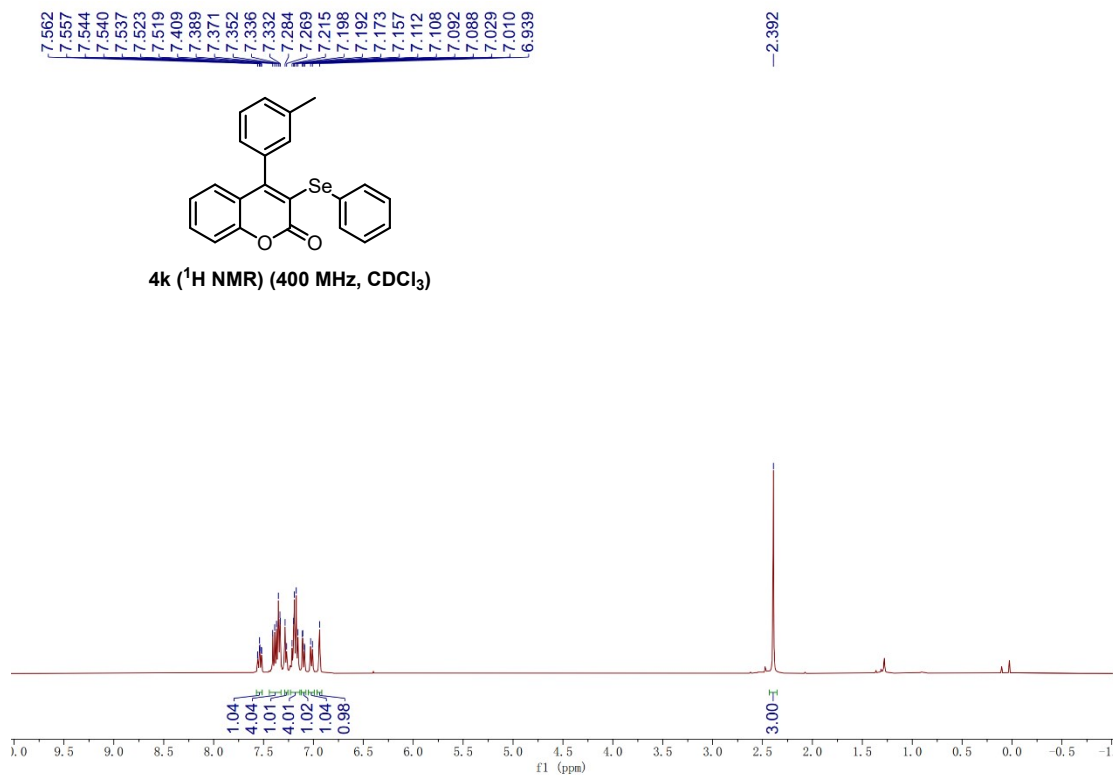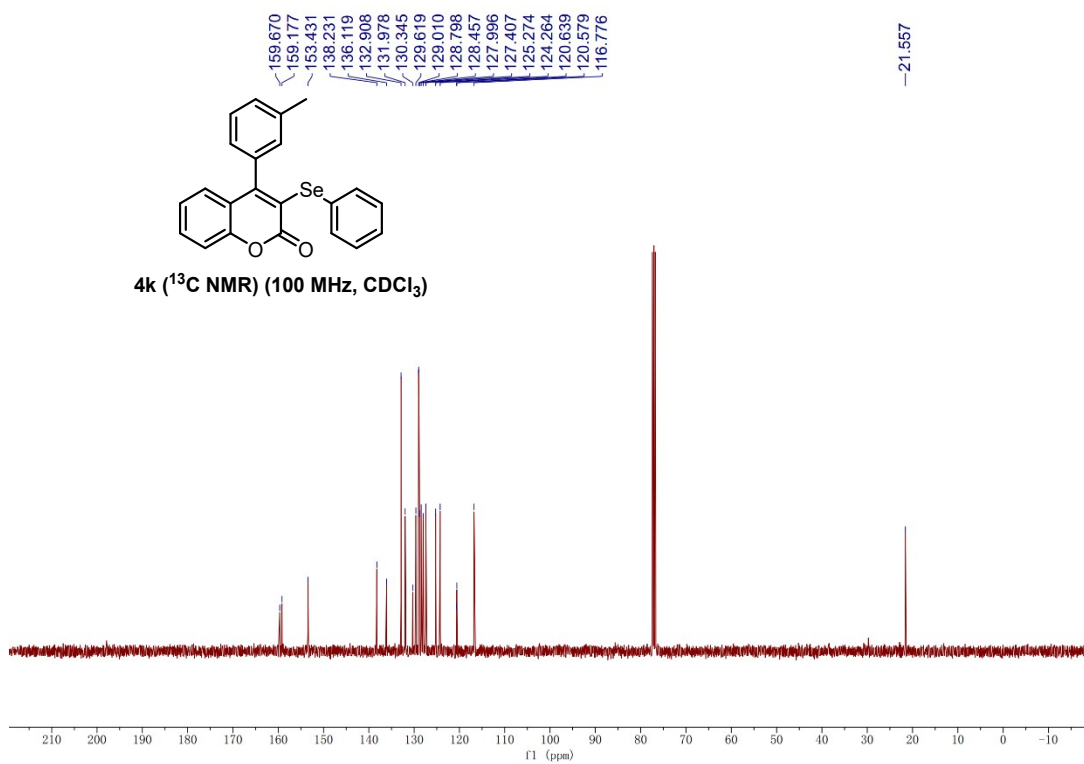

7.564  
7.560  
7.546  
7.543  
7.539  
7.526  
7.521  
7.415  
7.409  
7.396  
7.388  
7.374  
7.369  
7.354  
7.349  
7.217  
7.196  
7.178  
7.162  
7.137  
7.133  
7.117  
7.112  
7.020  
7.014  
6.999  
6.993  
6.809  
6.790  
6.688  
6.682  
6.677  
-3.799

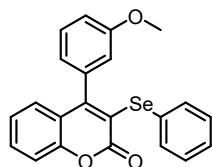

4I ( $^1\text{H NMR}$ ) (400 MHz,  $\text{CDCl}_3$ )

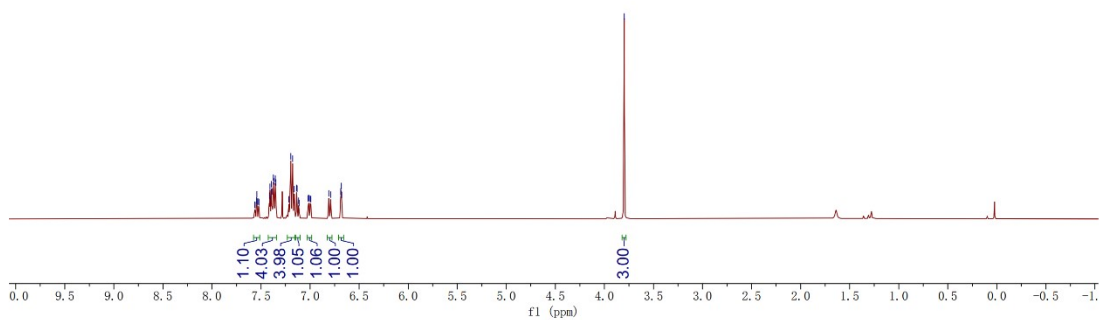

159.563  
159.539  
158.736  
153.449  
137.402  
132.918  
132.022  
130.279  
129.773  
129.040  
127.918  
127.443  
124.300  
120.640  
120.505  
120.426  
116.787  
114.505  
113.701  
-55.298

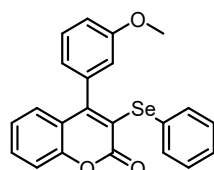

4I ( $^{13}\text{C NMR}$ ) (100 MHz,  $\text{CDCl}_3$ )

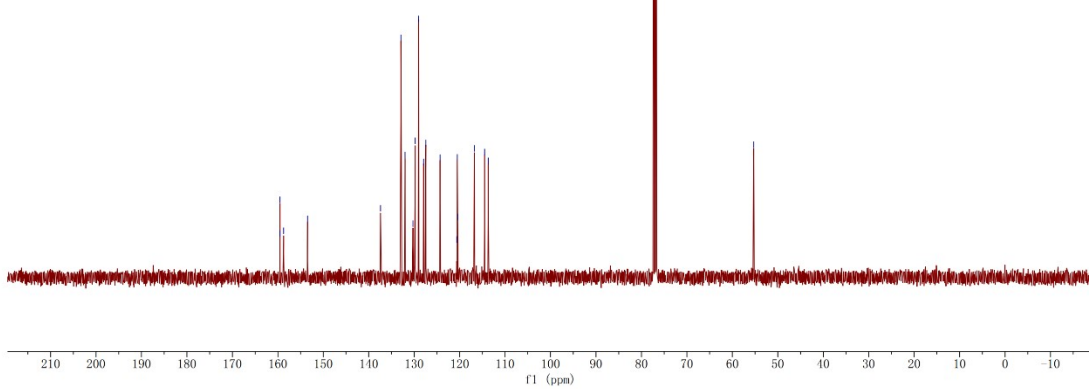

7.587  
7.583  
7.568  
7.563  
7.553  
7.536  
7.414  
7.394  
7.343  
7.324  
7.309  
7.244  
7.239  
7.221  
7.205  
7.192  
7.187  
7.172  
7.155  
7.137  
7.118  
7.042  
7.038  
7.022  
7.018

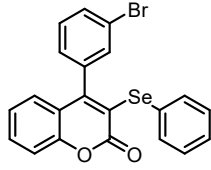

4m (<sup>1</sup>H NMR) (400 MHz, CDCl<sub>3</sub>)

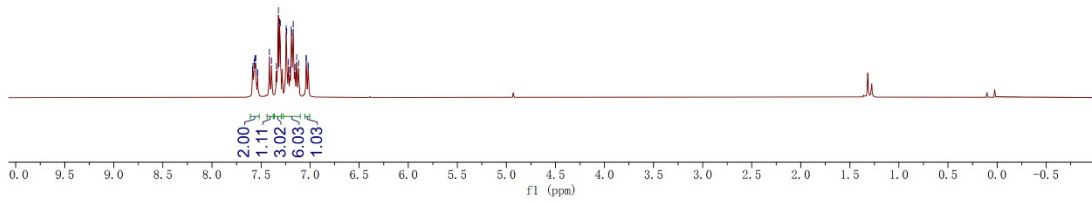

159.591  
156.663  
153.328  
137.808  
133.415  
132.204  
131.900  
131.183  
130.181  
129.765  
129.160  
127.868  
127.370  
126.987  
124.498  
122.572  
121.673  
120.163  
116.936

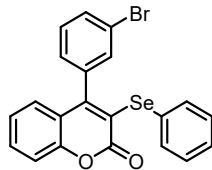

4m (<sup>13</sup>C NMR) (100 MHz, CDCl<sub>3</sub>)

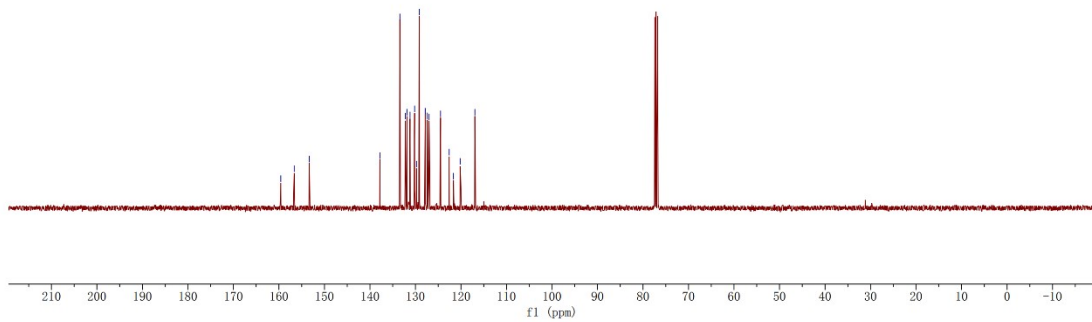

7.570  
7.566  
7.549  
7.527  
7.507  
7.504  
7.472  
7.468  
7.453  
7.449  
7.441  
7.430  
7.425  
7.419  
7.398  
7.379  
7.376  
7.239  
7.222  
7.214  
7.194  
7.187  
7.180  
7.173  
7.169  
7.162  
6.940  
6.920  
6.916

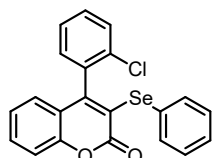

4n (<sup>1</sup>H NMR) (400 MHz, CDCl<sub>3</sub>)

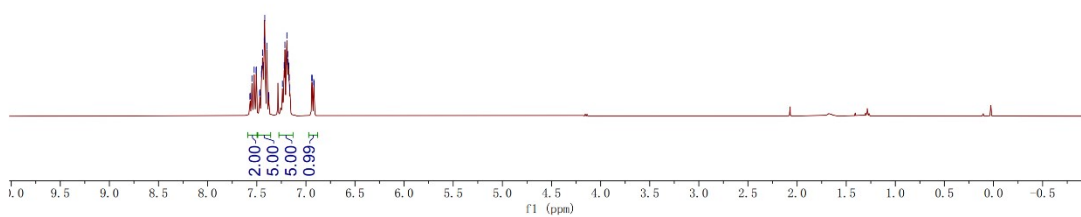

159.261  
156.145  
153.419  
135.135  
133.303  
132.369  
132.106  
130.462  
129.947  
129.909  
129.335  
129.093  
127.735  
127.162  
127.085  
124.504  
121.785  
119.655  
116.902

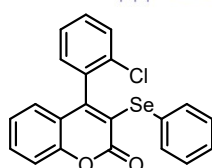

4n (<sup>13</sup>C NMR) (100 MHz, CDCl<sub>3</sub>)

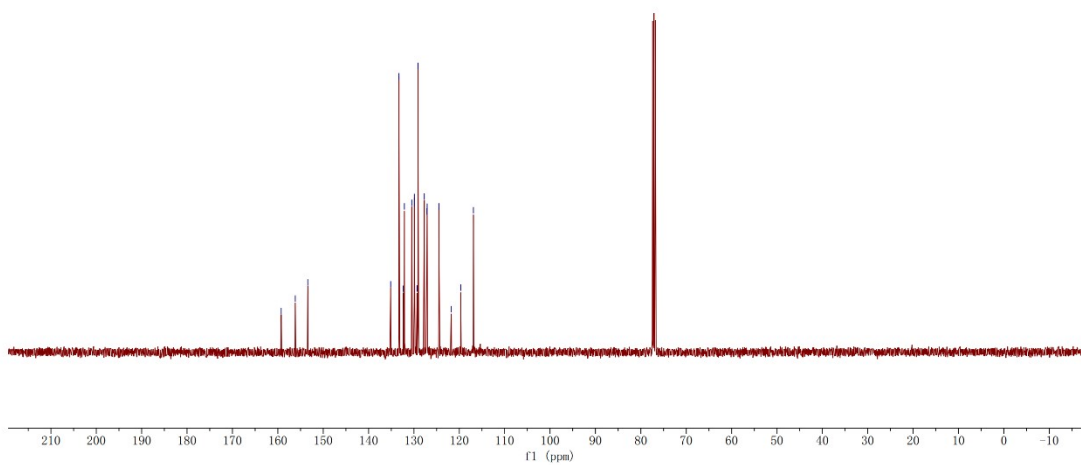

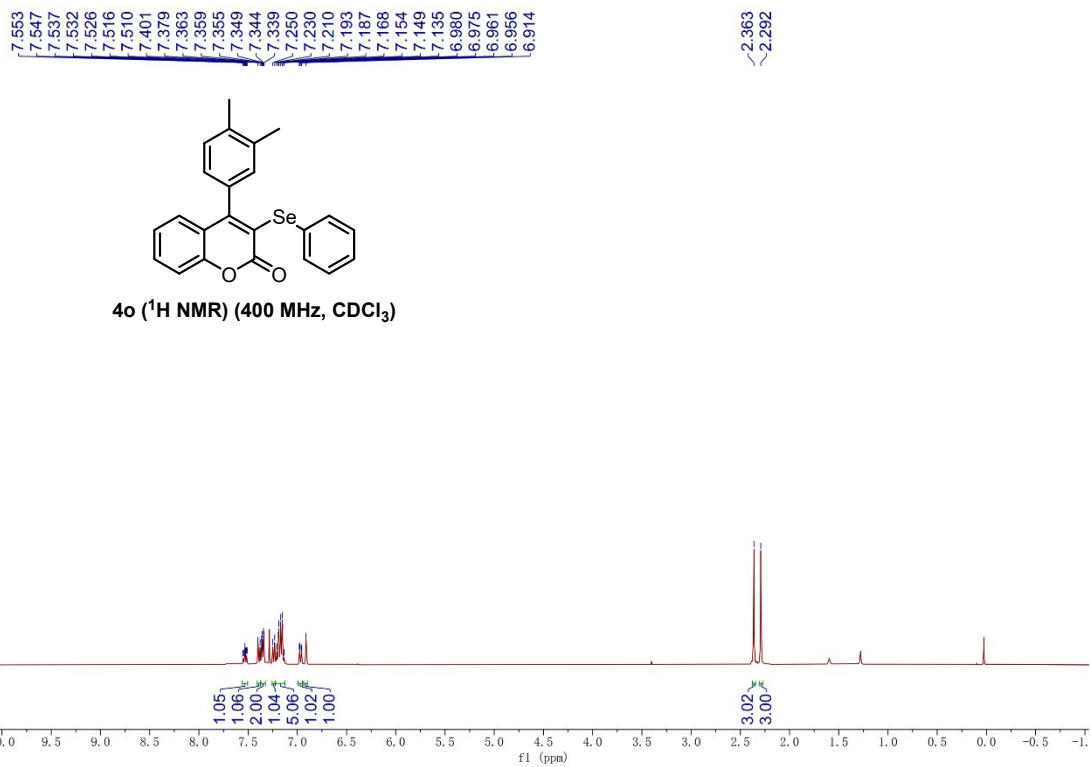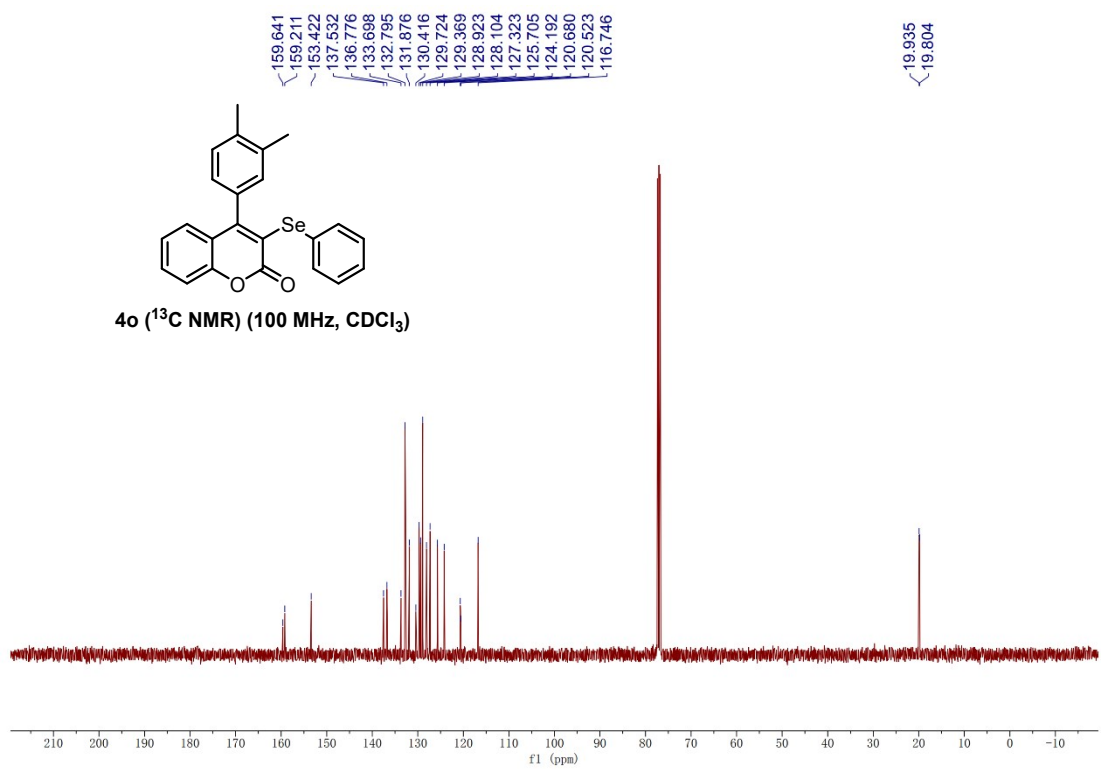

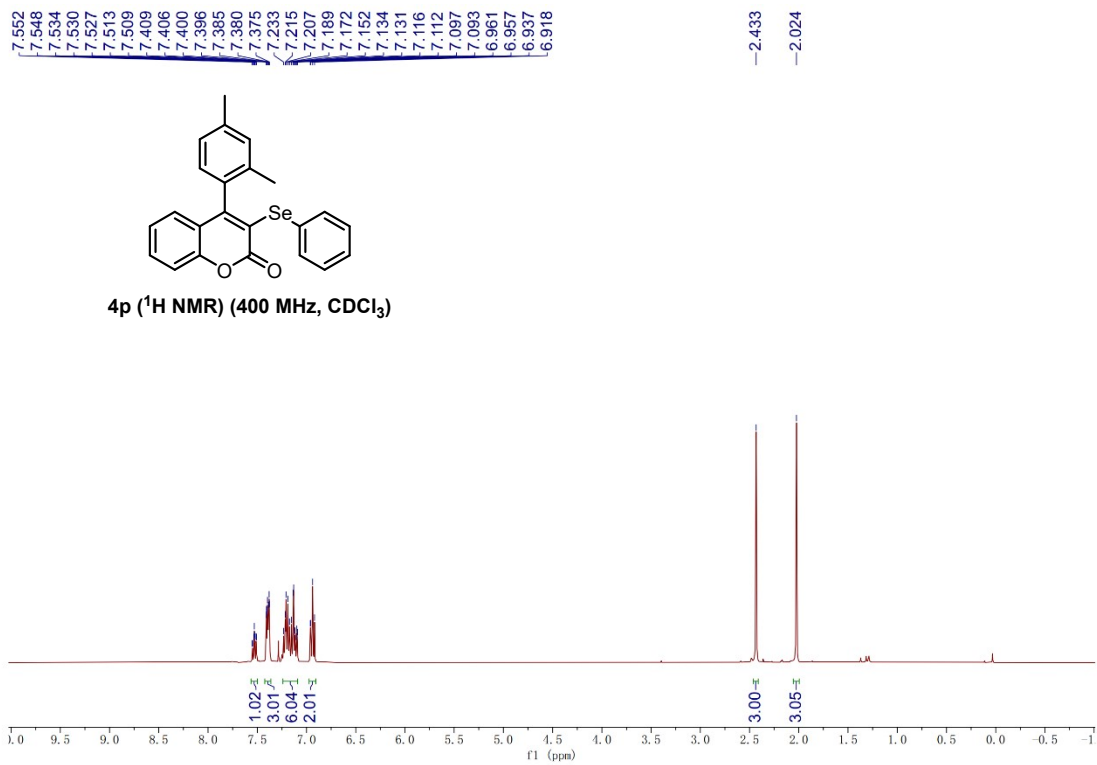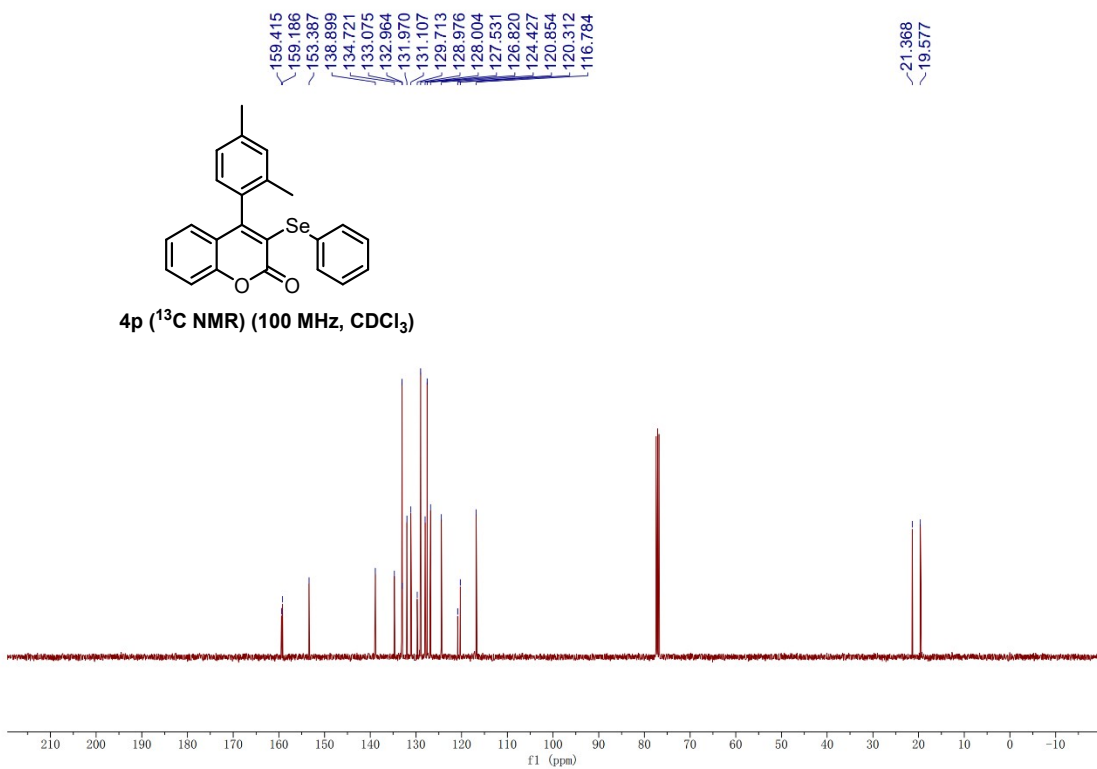

7.999  
7.978  
7.962  
7.941  
7.586  
7.581  
7.578  
7.560  
7.554  
7.542  
7.537  
7.533  
7.522  
7.518  
7.501  
7.497  
7.455  
7.452  
7.445  
7.430  
7.424  
7.419  
7.416  
7.403  
7.400  
7.394  
7.382  
7.379  
7.331  
7.328  
7.314  
7.311  
7.284  
7.280  
7.263  
7.259  
7.146  
7.142  
7.138  
7.131  
7.124  
7.118  
7.110  
7.106  
7.102  
7.085  
7.066  
7.049  
7.044  
7.042  
7.039  
7.024  
7.021  
6.829  
6.809  
6.805

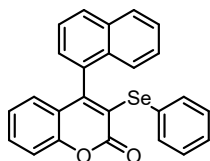

4q (<sup>1</sup>H NMR) (400 MHz, CDCl<sub>3</sub>)

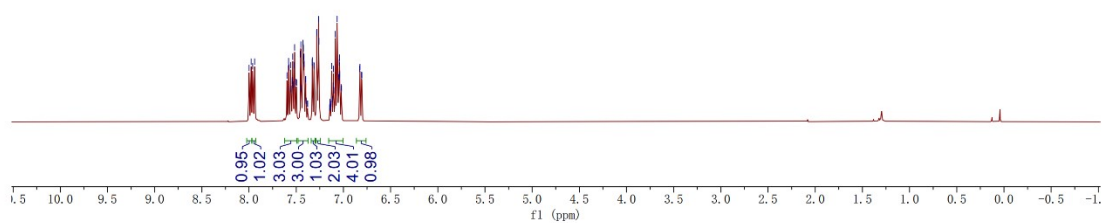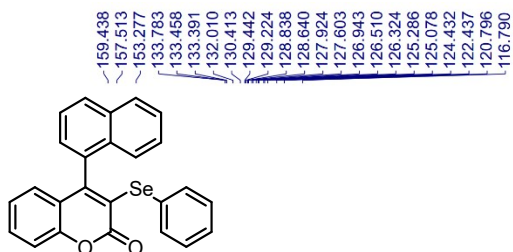

4q (<sup>13</sup>C NMR) (100 MHz, CDCl<sub>3</sub>)

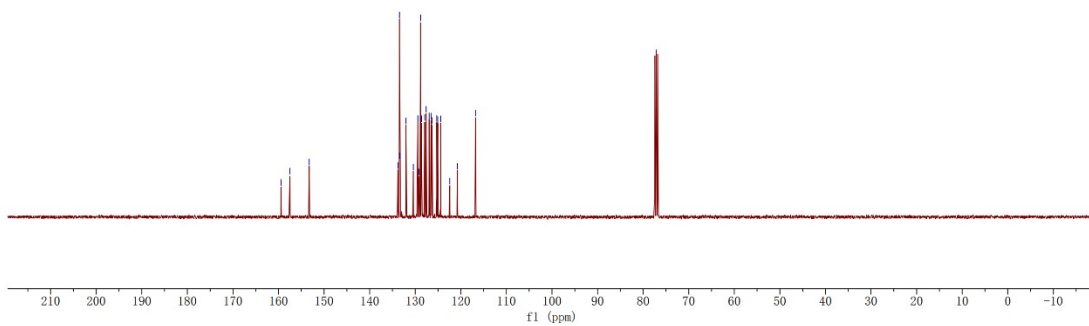



7.570  
7.555  
7.535  
7.531  
7.448  
7.444  
7.429  
7.424  
7.386  
7.383  
7.375  
7.372  
7.359  
7.355  
7.339  
7.335  
7.243  
7.228  
7.209  
7.195  
7.188  
7.174  
7.165  
7.161  
7.153  
7.025  
7.022  
7.016  
7.013

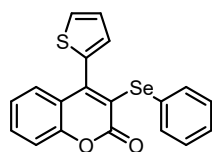

4r (<sup>1</sup>H NMR) (400 MHz, CDCl<sub>3</sub>)

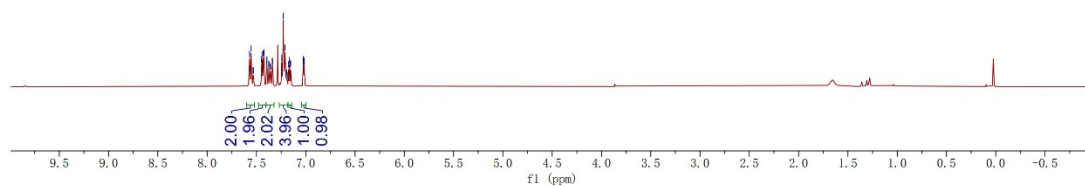

153.102  
151.777  
135.679  
133.079  
132.070  
129.985  
129.257  
129.095  
127.720  
127.655  
127.639  
127.279  
124.598  
123.831  
120.761  
116.772

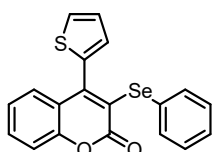

4r (<sup>13</sup>C NMR) (100 MHz, CDCl<sub>3</sub>)

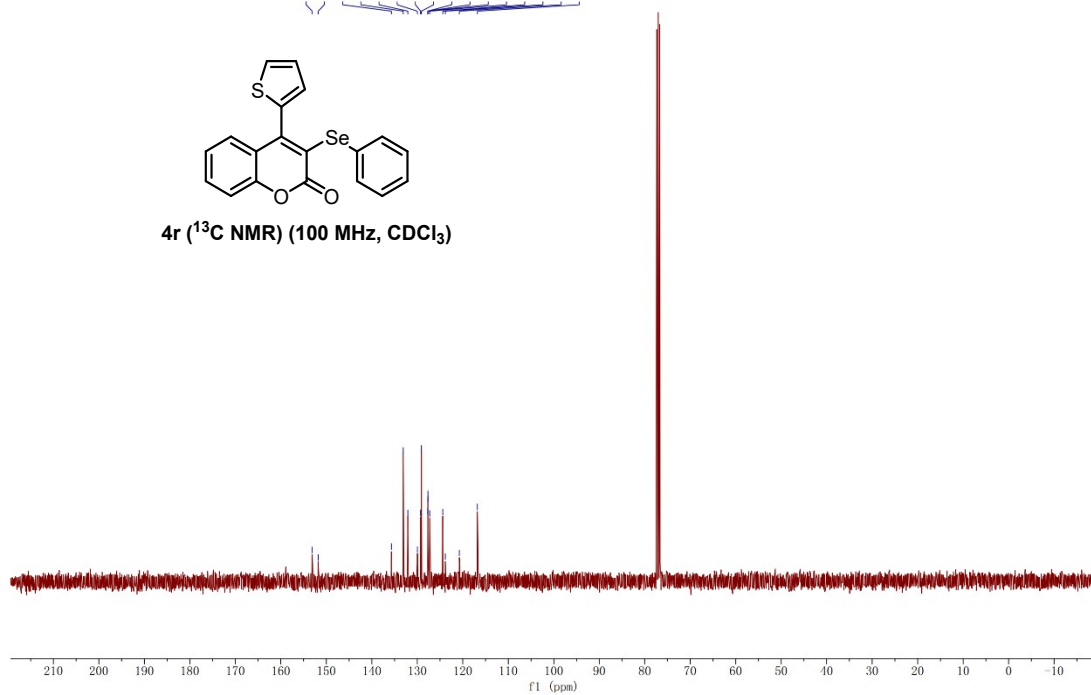

7.493  
7.487  
7.480  
7.475  
7.466  
7.365  
7.360  
7.345  
7.330  
7.325  
7.306  
7.209  
7.204  
7.199  
7.192  
7.187  
7.188  
7.152  
6.842

-2.287

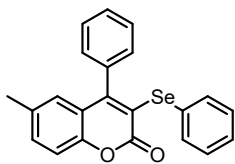

4s (<sup>1</sup>H NMR) (400 MHz, CDCl<sub>3</sub>)

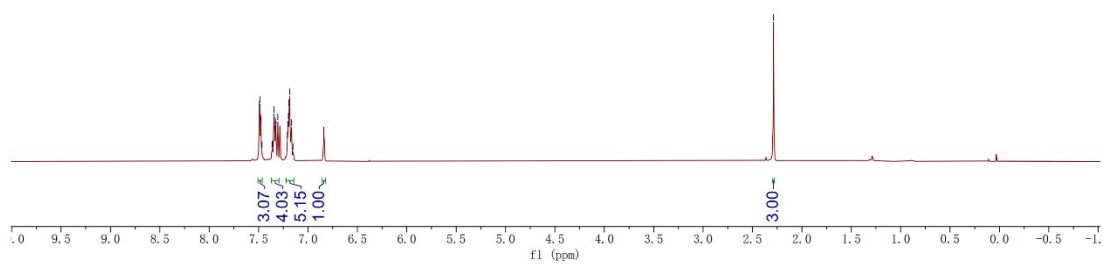

159.751  
159.139  
151.696  
136.382  
134.018  
133.088  
132.725  
130.487  
129.036  
128.824  
128.495  
128.244  
127.596  
127.352  
120.614  
120.208  
116.568

-20.909

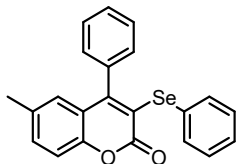

4s (<sup>13</sup>C NMR) (100 MHz, CDCl<sub>3</sub>)

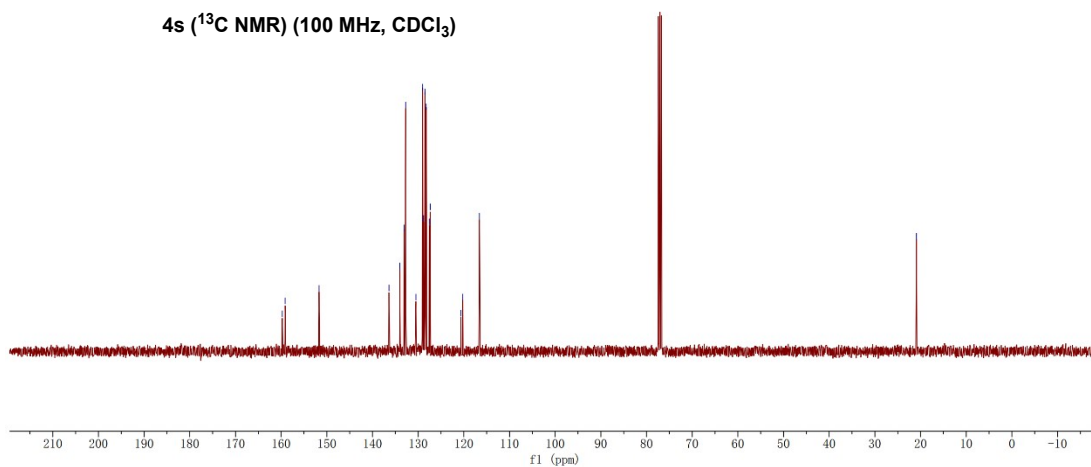

7.493  
7.487  
7.480  
7.475  
7.403  
7.398  
7.382  
7.377  
7.346  
7.342  
7.338  
7.326  
7.322  
7.316  
7.211  
7.206  
7.194  
7.198  
7.190  
7.185  
7.166  
7.150  
7.144  
6.860  
6.855

2.603  
2.584  
2.565  
2.546

1.166  
1.147  
1.128

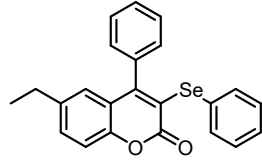

4t (<sup>1</sup>H NMR) (400 MHz, CDCl<sub>3</sub>)

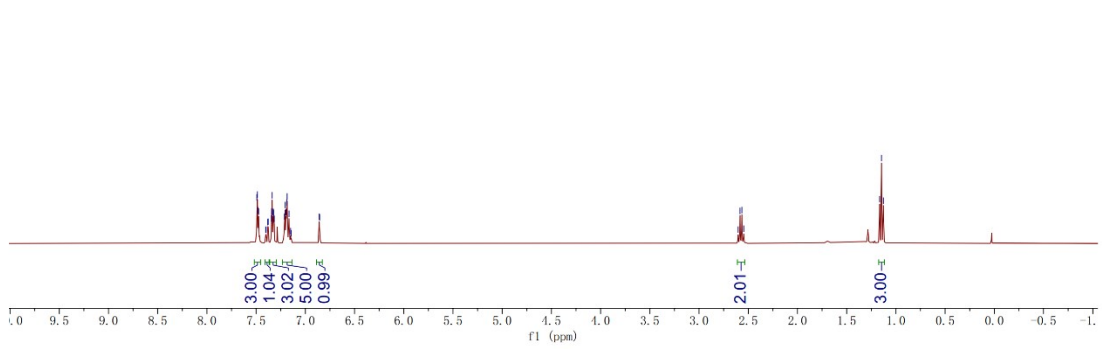

159.769  
159.236  
151.840  
140.447  
136.381  
132.690  
131.928  
130.516  
129.030  
128.825  
128.472  
128.262  
127.330  
126.560  
120.552  
120.242  
116.692

28.277

15.710

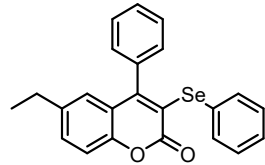

4t (<sup>13</sup>C NMR) (100 MHz, CDCl<sub>3</sub>)

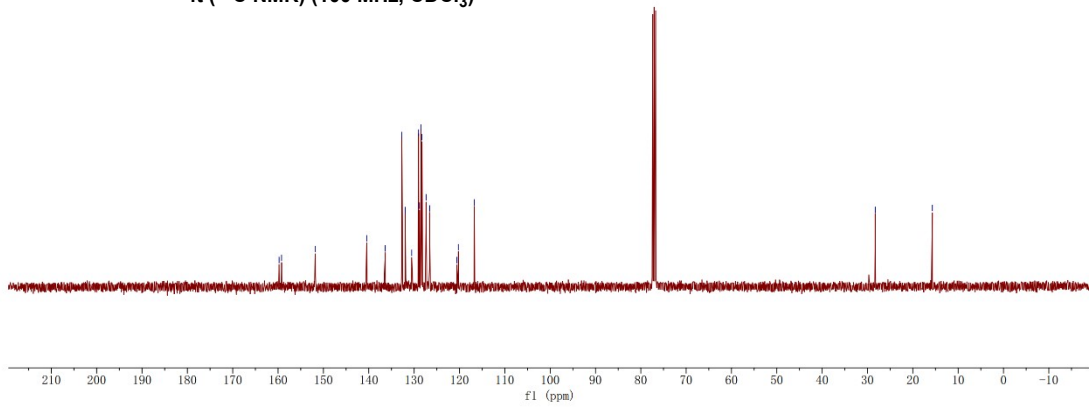

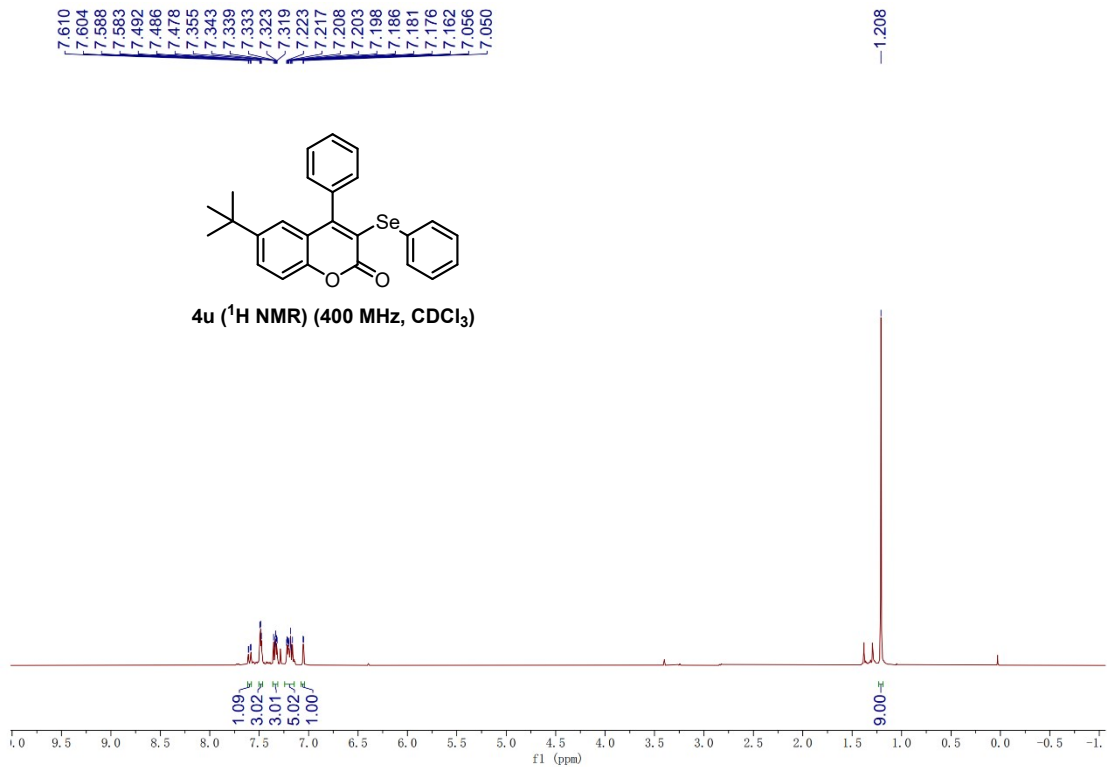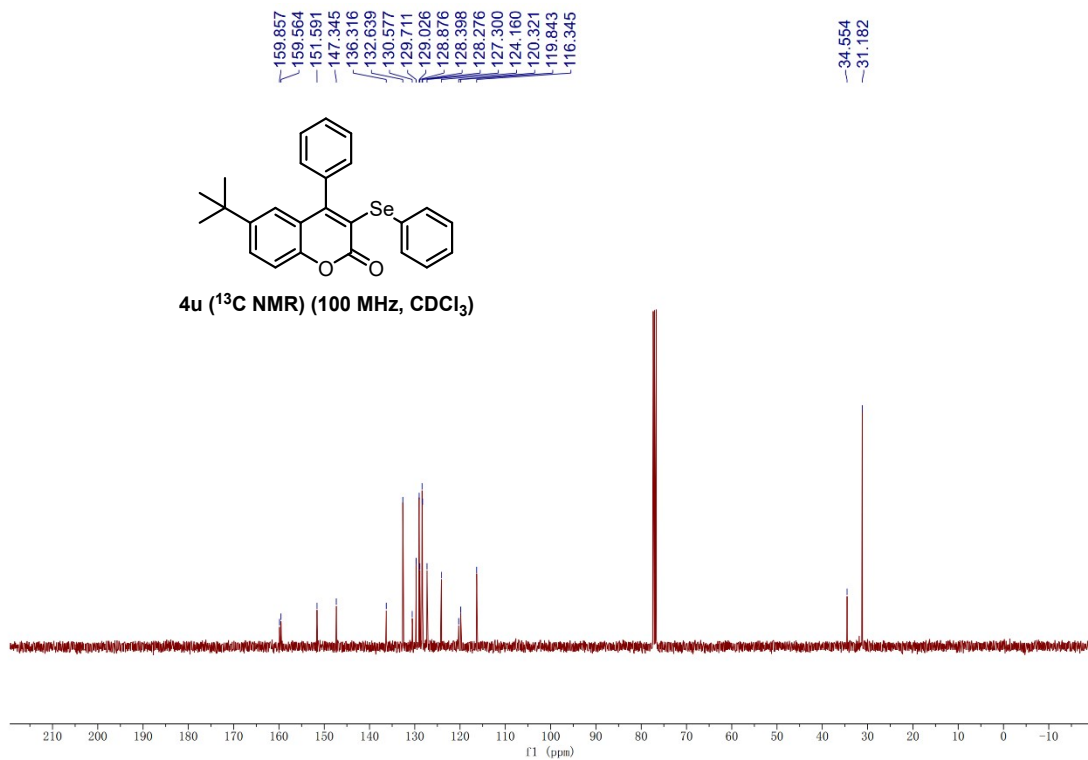

7.475  
7.469  
7.461  
7.458  
7.347  
7.341  
7.324  
7.320  
7.203  
7.198  
7.192  
7.189  
7.183  
7.179  
7.165  
7.135  
6.476  
6.503

-3.672

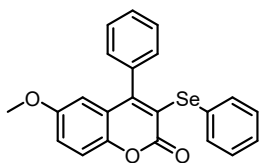

4v (<sup>1</sup>H NMR) (400 MHz, CDCl<sub>3</sub>)

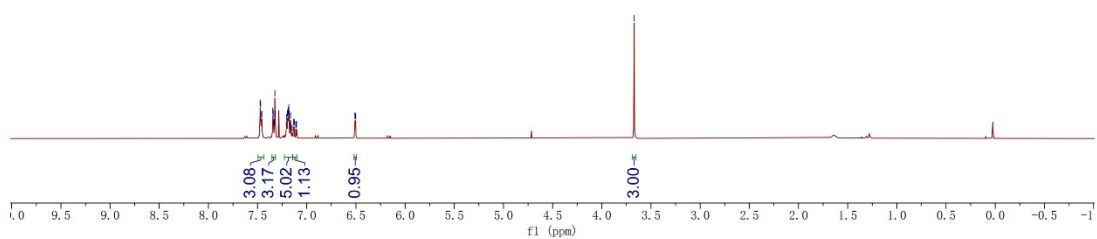

159.711  
158.587  
155.857  
147.972  
136.244  
132.860  
130.352  
129.034  
128.901  
128.539  
128.175  
127.405  
121.343  
120.953  
119.090  
117.721  
110.776

-55.714

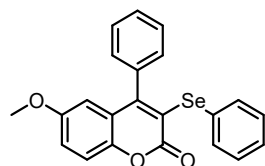

4v (<sup>13</sup>C NMR) (100 MHz, CDCl<sub>3</sub>)

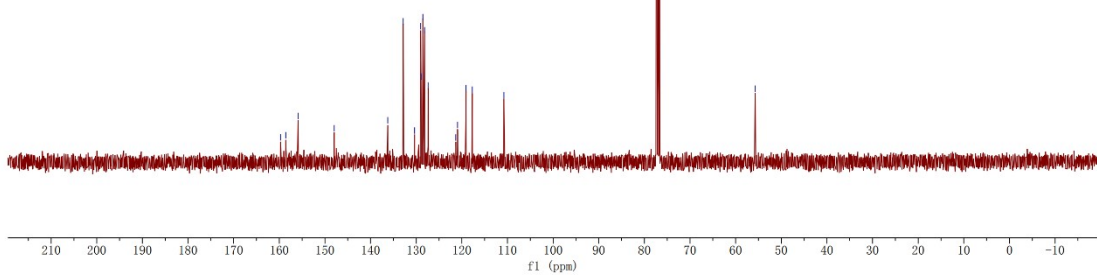

7.489  
7.484  
7.476  
7.472  
7.361  
7.349  
7.333  
7.328  
7.240  
7.222  
7.216  
7.204  
7.196  
7.189  
7.182  
6.770  
6.762  
6.747  
6.740

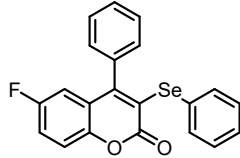

4w (<sup>1</sup>H NMR) (400 MHz, CDCl<sub>3</sub>)

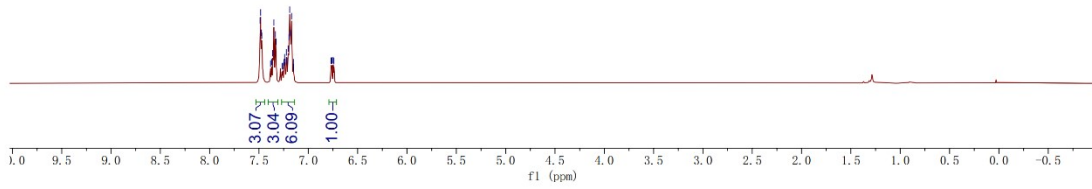

159.845  
159.206  
157.484  
157.455  
157.421  
149.546  
149.525  
135.675  
133.222  
129.878  
129.170  
129.112  
128.748  
128.152  
127.673  
122.492  
121.433  
121.348  
119.433  
119.188  
118.351  
118.267  
113.345  
113.094

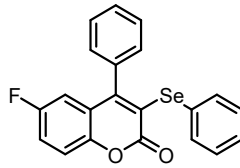

4w (<sup>13</sup>C NMR) (100 MHz, CDCl<sub>3</sub>)

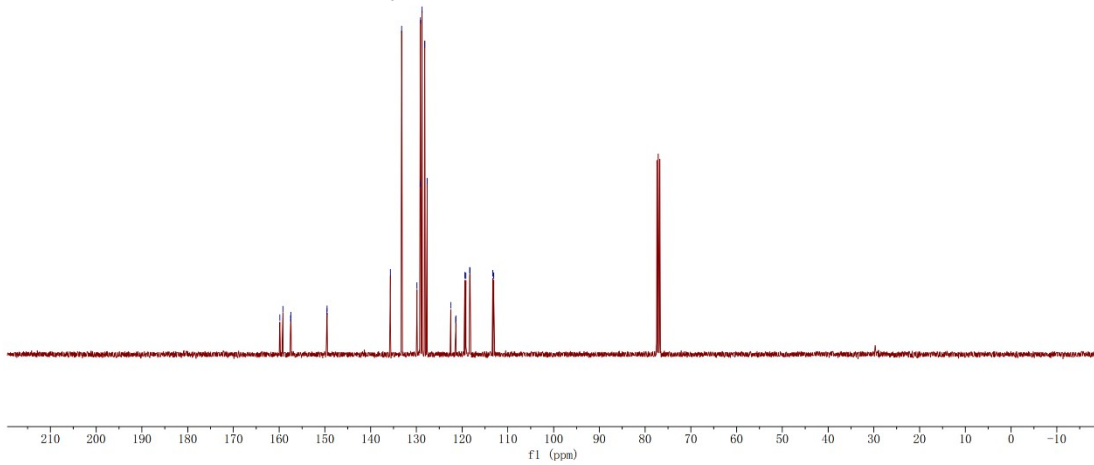

7.501  
7.496  
7.488  
7.483  
7.473  
7.467  
7.350  
7.346  
7.342  
7.335  
7.329  
7.325  
7.228  
7.214  
7.210  
7.206  
7.192  
7.187  
7.178  
7.174  
7.168  
7.157  
7.033  
7.027

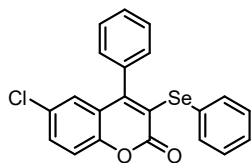

4x (<sup>1</sup>H NMR) (400 MHz, CDCl<sub>3</sub>)

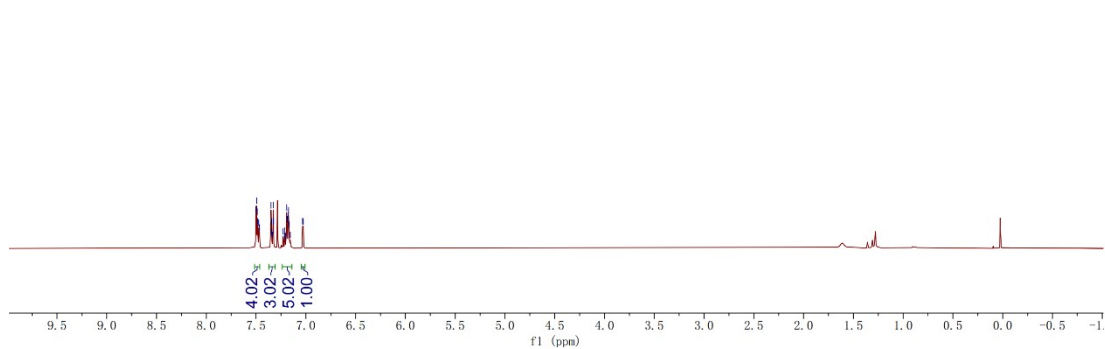

158.925  
157.201  
151.796  
135.524  
133.247  
131.793  
129.820  
129.701  
129.195  
129.098  
128.767  
128.172  
127.692  
126.982  
122.556  
121.612  
118.238

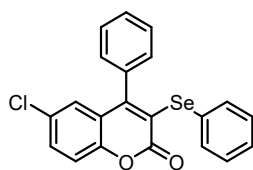

4x (<sup>13</sup>C NMR) (100 MHz, CDCl<sub>3</sub>)

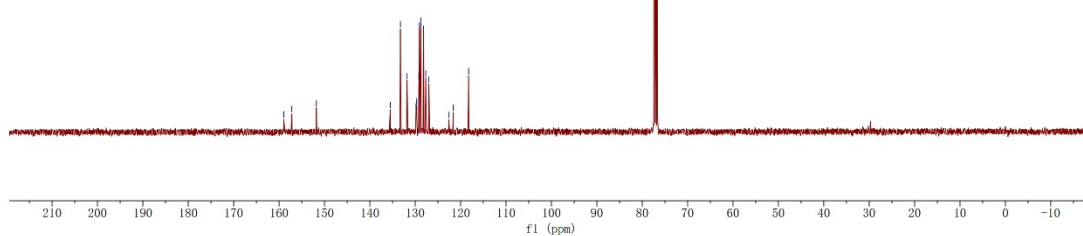

9.876  
8.081  
8.076  
8.060  
8.055  
7.594  
7.589  
7.535  
7.530  
7.525  
7.518  
7.513  
7.501  
7.372  
7.369  
7.366  
7.358  
7.352  
7.348  
7.241  
7.231  
7.226  
7.223  
7.219  
7.214  
7.206  
7.204  
7.200  
7.190  
7.185  
7.180  
7.168

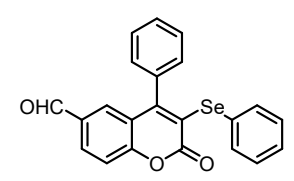

4y (<sup>1</sup>H NMR) (400 MHz, CDCl<sub>3</sub>)

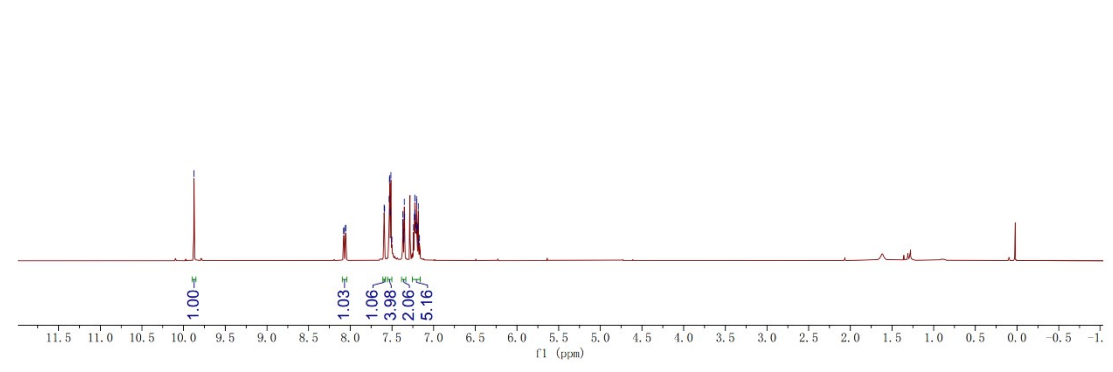

190.094  
158.470  
157.568  
157.039  
135.373  
133.406  
132.634  
131.808  
130.616  
129.590  
129.411  
129.145  
128.894  
128.223  
127.840  
122.634  
120.888  
117.978

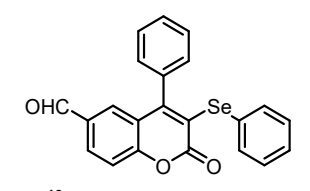

4y (<sup>13</sup>C NMR) (100 MHz, CDCl<sub>3</sub>)

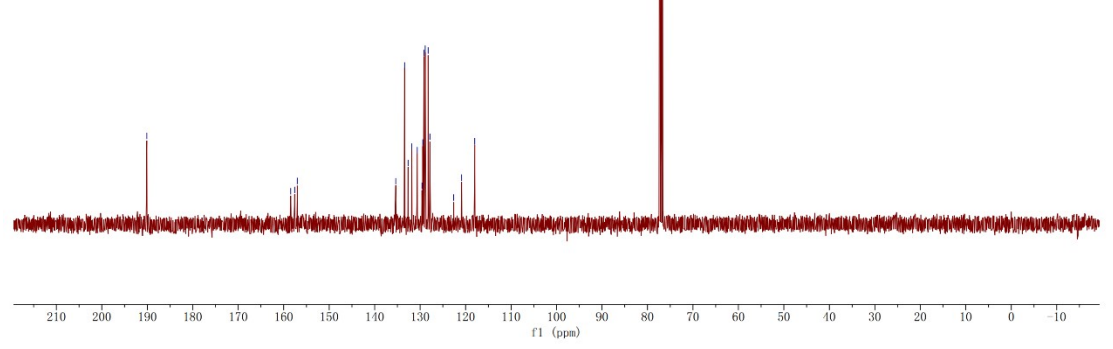



7.489  
7.484  
7.477  
7.472  
7.462  
7.364  
7.360  
7.356  
7.350  
7.344  
7.339  
7.333  
7.316  
7.312  
7.308  
7.292  
7.288  
7.225  
7.219  
7.206  
7.200  
7.193  
7.181  
7.175  
7.163  
7.158  
7.153  
7.119  
7.107  
7.098  
7.087  
7.078  
7.066  
6.859  
6.839

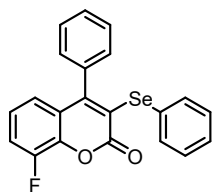

4z (<sup>1</sup>H NMR) (400 MHz, CDCl<sub>3</sub>)

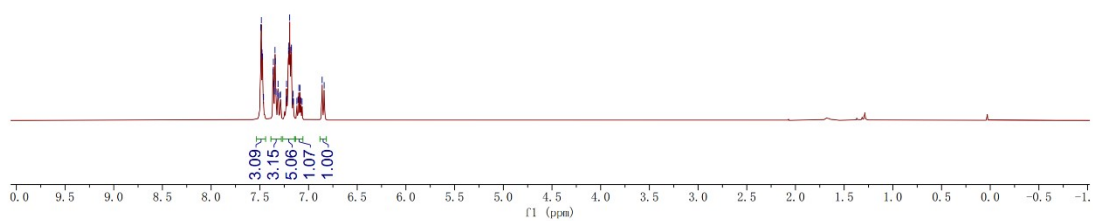

158.161  
158.132  
158.108  
150.787  
148.281  
141.837  
141.720  
135.981  
133.221  
129.878  
129.113  
129.092  
128.617  
128.214  
127.688  
123.877  
123.809  
123.028  
122.991  
122.384  
122.149  
118.225  
118.054

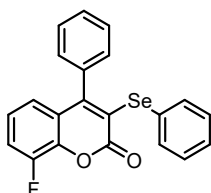

4z (<sup>13</sup>C NMR) (100 MHz, CDCl<sub>3</sub>)

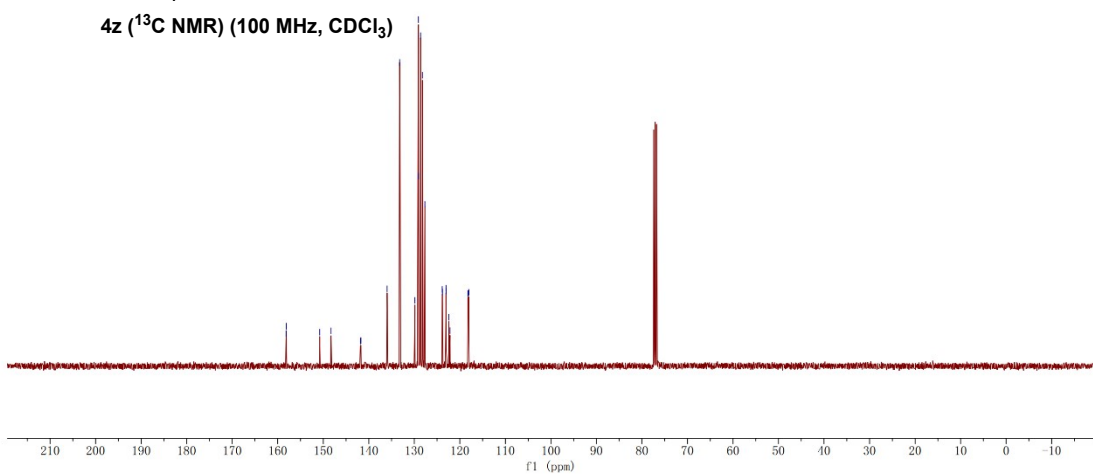

8.057  
8.054  
8.048  
8.039  
8.032  
7.778  
7.772  
7.764  
7.758  
7.754  
7.731  
7.711  
7.541  
7.538  
7.523  
7.520  
7.454  
7.448  
7.439  
7.430  
7.424  
7.319  
7.313  
7.306  
7.301  
7.284  
7.228  
7.210  
7.189  
7.040  
7.036  
7.021  
7.016  
6.757

-2.244

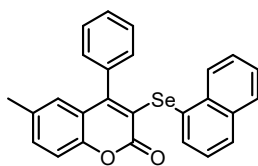

4aa (<sup>1</sup>H NMR) (400 MHz, CDCl<sub>3</sub>)

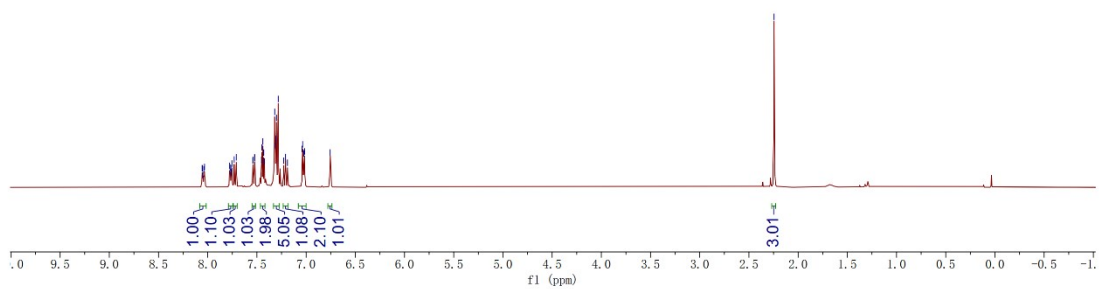

159.901  
158.144  
151.428  
135.645  
133.954  
133.877  
133.844  
133.275  
132.836  
129.208  
128.814  
128.567  
128.442  
128.266  
128.141  
127.560  
127.158  
126.540  
126.045  
125.725  
120.906  
120.311  
116.524

-20.898

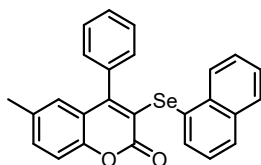

4aa (<sup>13</sup>C NMR) (100 MHz, CDCl<sub>3</sub>)

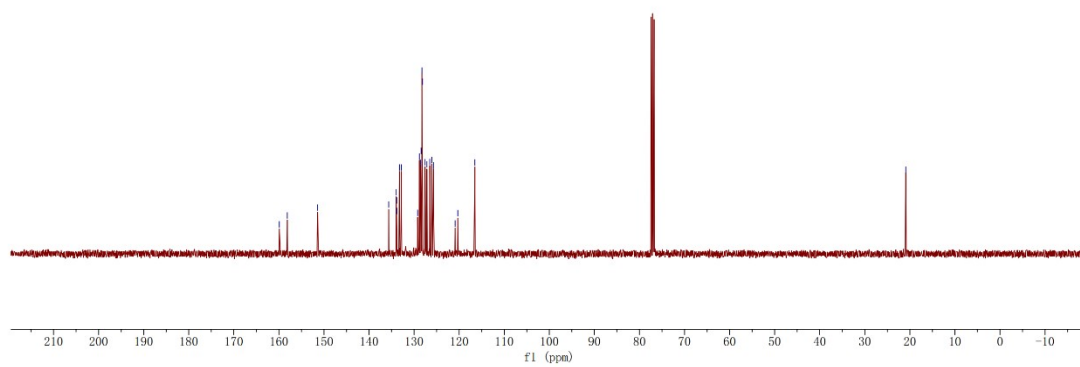

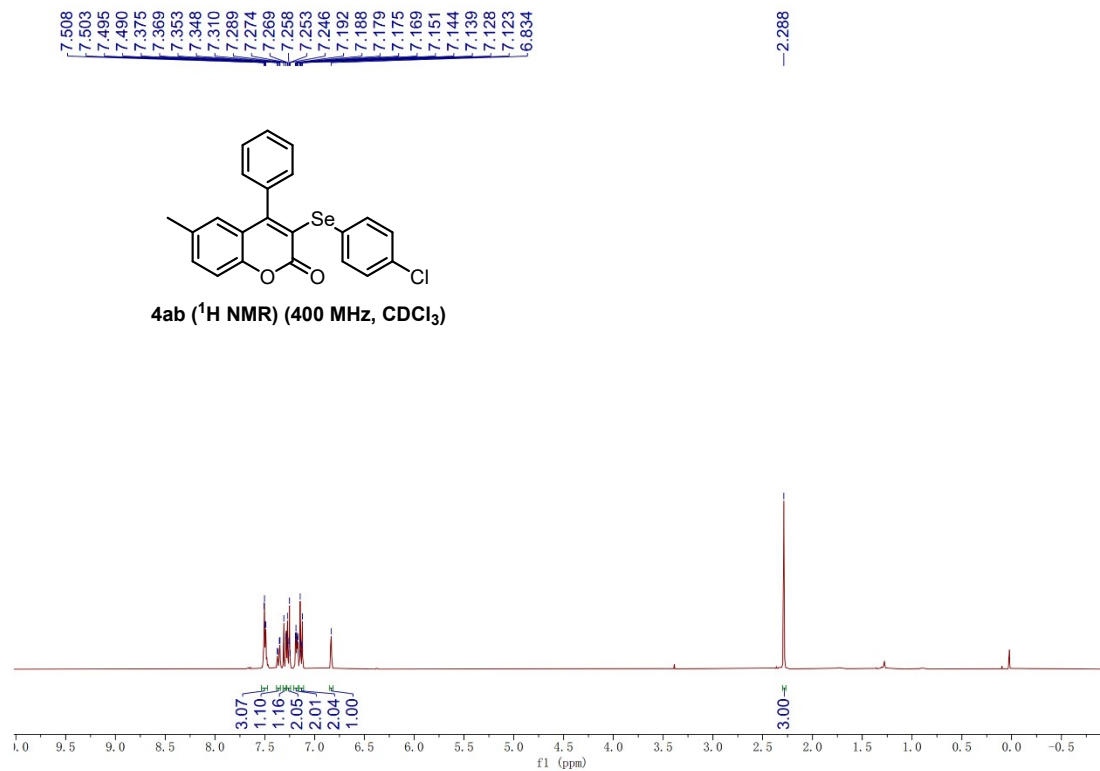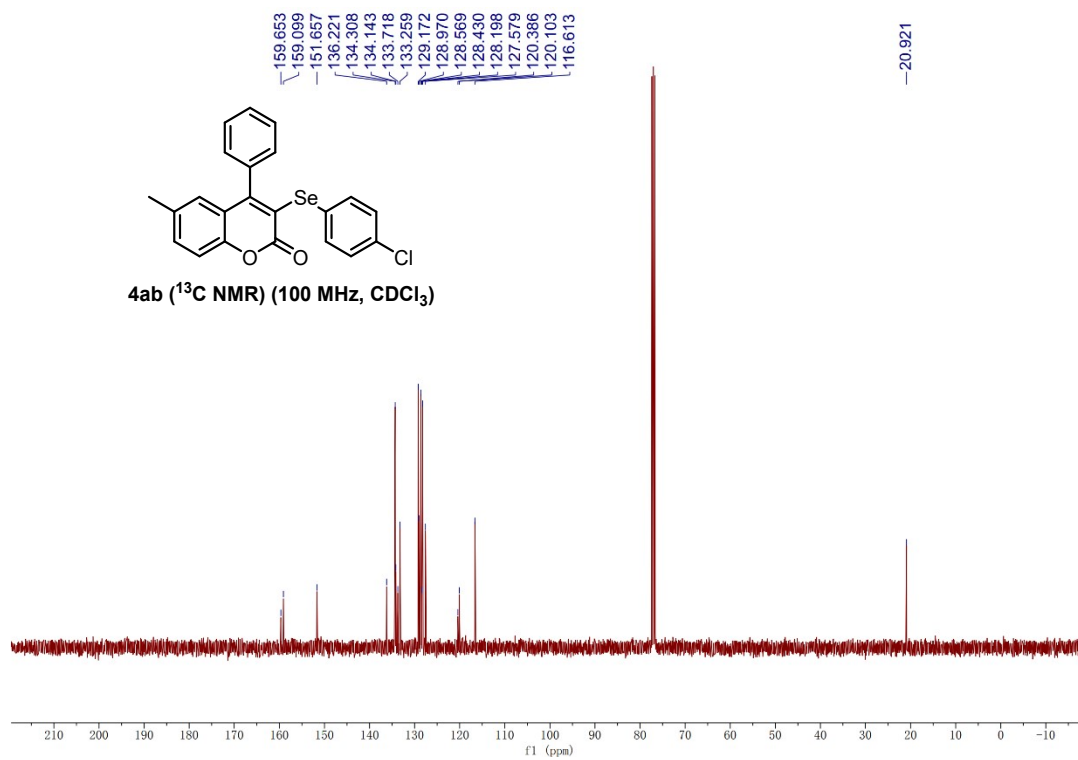

7.505  
7.499  
7.491  
7.488  
7.484  
7.428  
7.412  
7.407  
7.340  
7.319  
7.285  
7.235  
7.224  
7.218  
7.210  
7.200  
6.995  
6.975  
6.877  
6.872

2.865  
2.848  
2.830  
2.813  
2.796  
2.296

1.164  
1.147

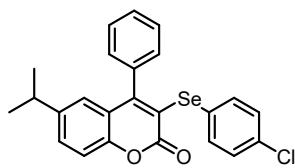

4ac (<sup>1</sup>H NMR) (400 MHz, CDCl<sub>3</sub>)

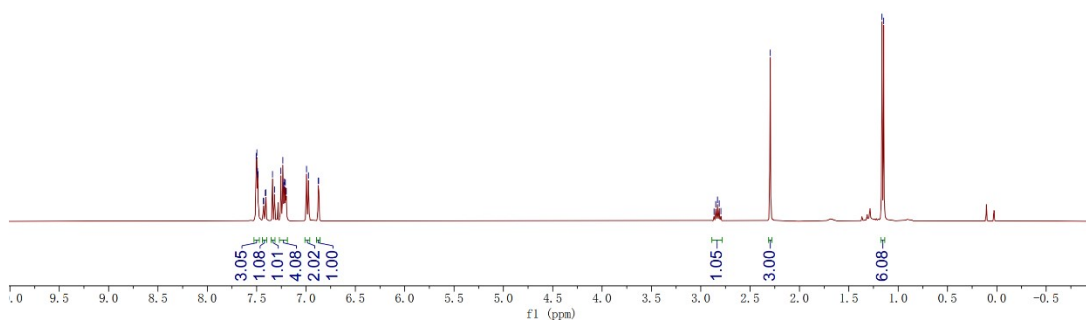

159.823  
158.888  
151.804  
145.019  
137.442  
136.426  
133.120  
130.207  
129.842  
128.822  
128.440  
128.331  
126.630  
125.293  
120.844  
120.215  
116.691

33.634  
23.970  
21.155

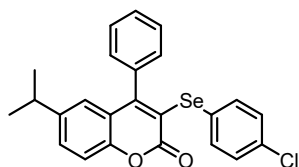

4ac (<sup>13</sup>C NMR) (100 MHz, CDCl<sub>3</sub>)

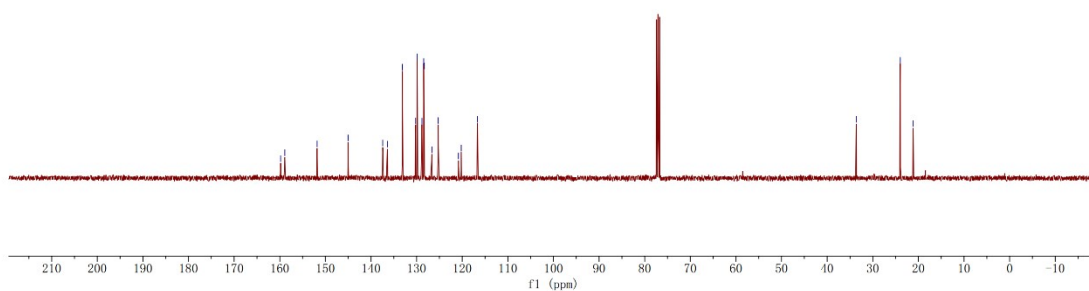

7.582  
7.568  
7.565  
7.558  
7.553  
7.550  
7.540  
7.532  
7.514  
7.510  
7.507  
7.493  
7.489  
7.402  
7.399  
7.381  
7.378  
7.306  
7.300  
7.287  
7.283  
7.184  
7.181  
7.164  
7.146  
7.143  
7.070  
7.066  
7.051  
7.047

-2.269

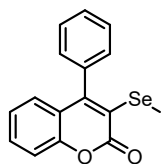

4ad (<sup>1</sup>H NMR) (400 MHz, CDCl<sub>3</sub>)

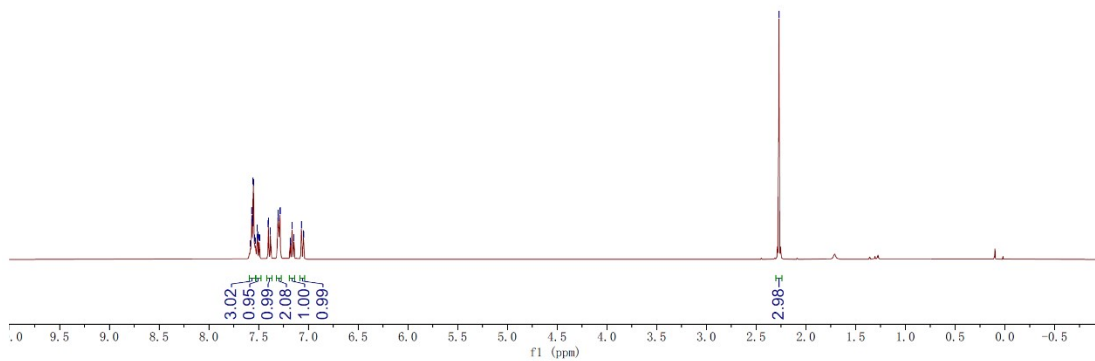

159.397  
155.956  
152.978  
136.364  
131.289  
129.095  
128.738  
128.318  
127.257  
124.239  
120.499  
120.224  
116.652

-8.433

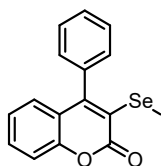

4ad (<sup>13</sup>C NMR) (100 MHz, CDCl<sub>3</sub>)

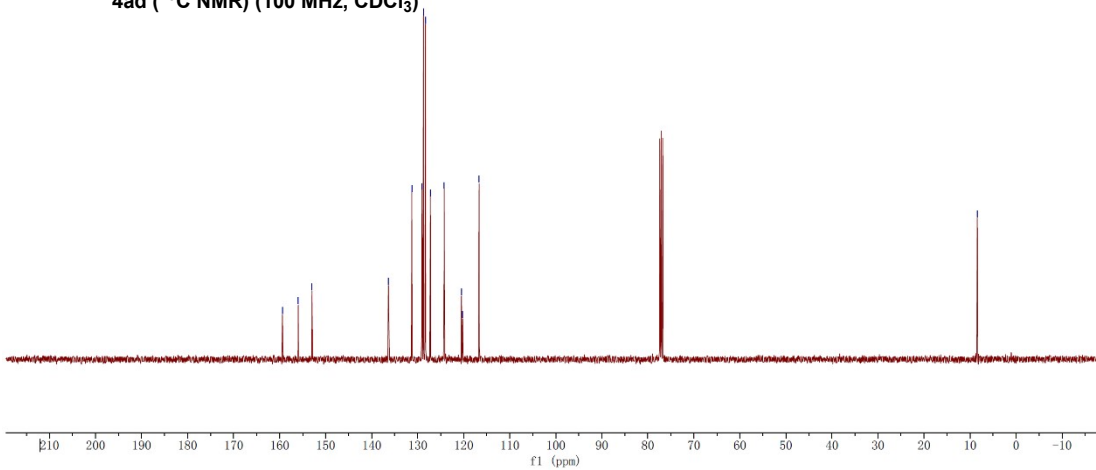

7.573  
7.569  
7.560  
7.545  
7.541  
7.533  
7.515  
7.512  
7.498  
7.494  
7.408  
7.405  
7.387  
7.385  
7.279  
7.273  
7.267  
7.264  
7.259  
7.255  
7.184  
7.163  
7.146  
7.059  
7.055  
7.039  
7.035

3.020  
3.001  
2.982  
2.964

1.323  
1.305  
1.286

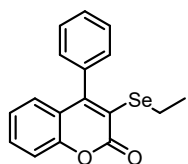

4ae ( $^1\text{H}$  NMR) (400 MHz,  $\text{CDCl}_3$ )

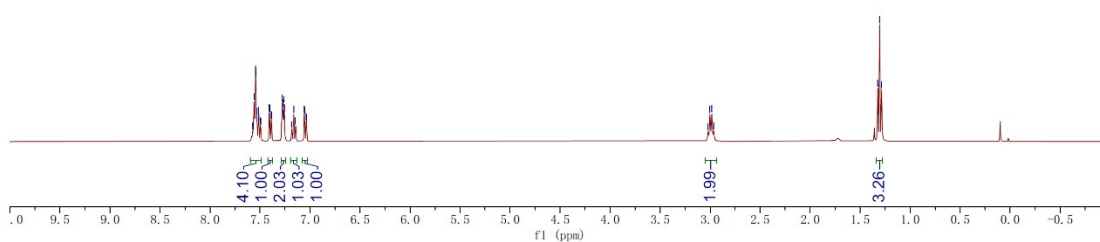

159.561  
157.137  
153.072  
136.598  
131.344  
128.969  
128.675  
128.351  
127.407  
124.225  
120.582  
119.313  
116.651

21.481  
15.705

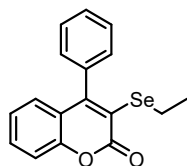

4ae ( $^{13}\text{C}$  NMR) (100 MHz,  $\text{CDCl}_3$ )

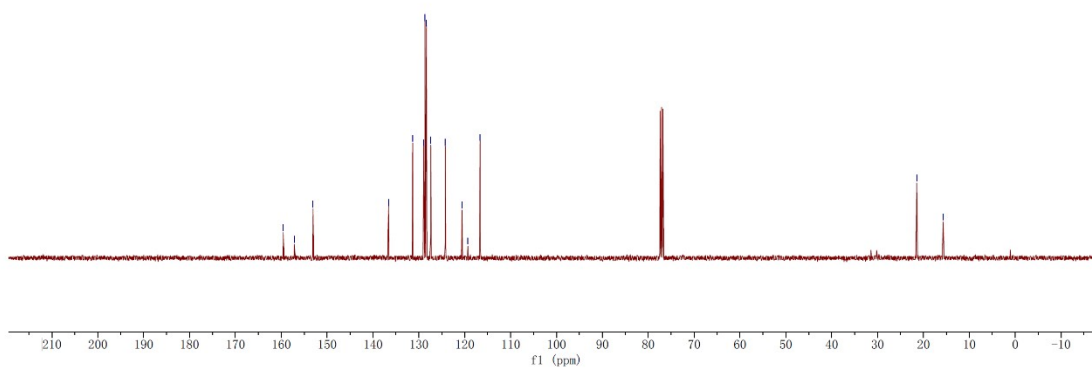

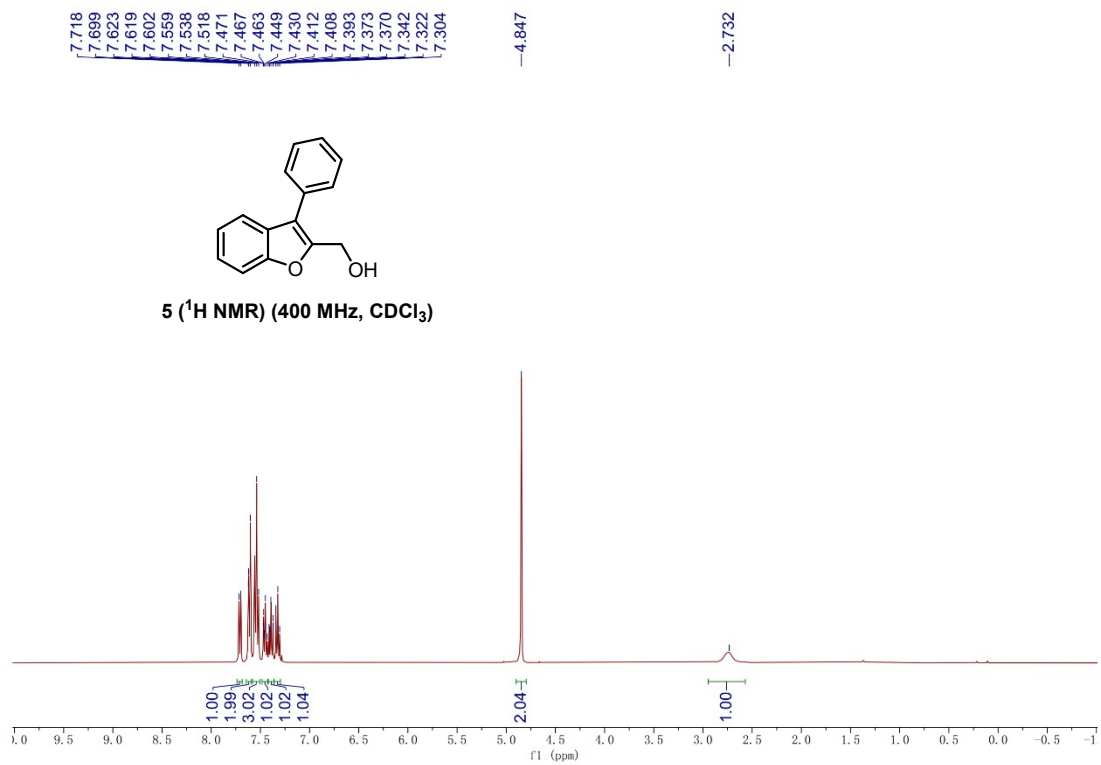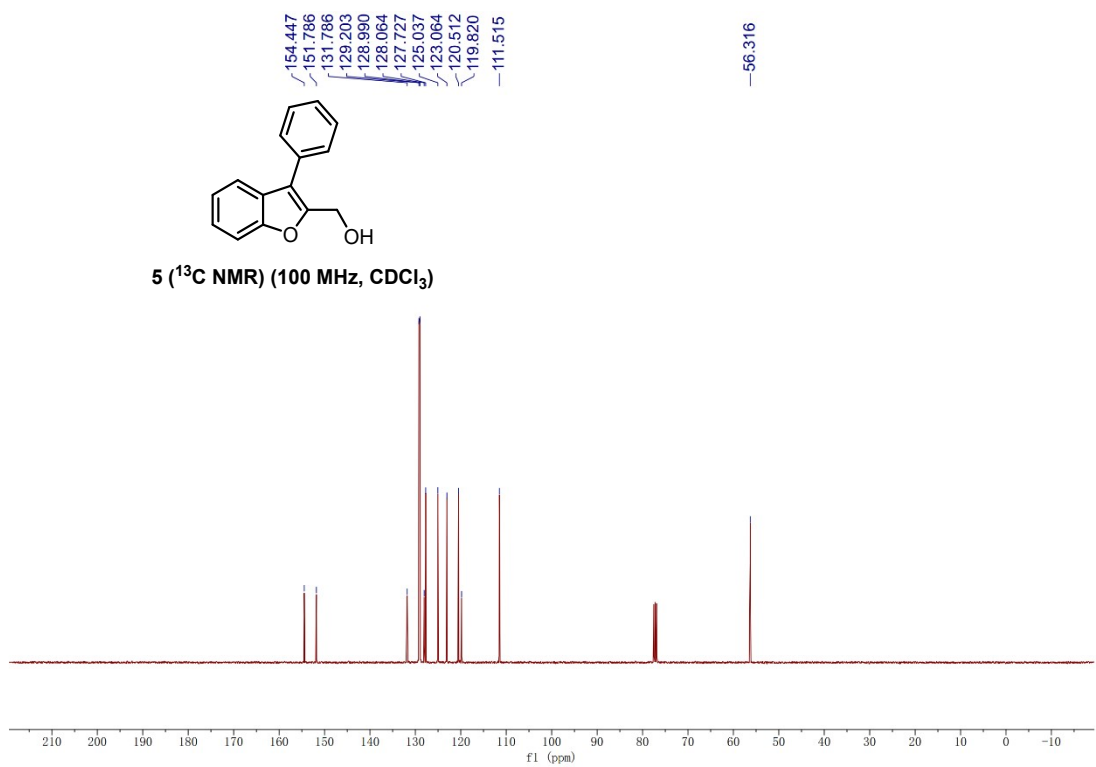

7.726  
7.717  
7.707  
7.702  
7.615  
7.600  
7.595  
7.588  
7.583  
7.577  
7.571  
7.568  
7.554  
7.550  
7.506  
7.488  
7.470  
7.466  
7.456  
7.447  
7.443  
7.435  
7.429  
7.420  
7.415  
7.410  
7.397  
7.343  
7.322  
7.207  
7.197  
7.177  
7.169  
7.102  
7.098  
7.082  
7.078

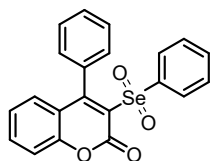

6 (<sup>1</sup>H NMR) (400 MHz, CDCl<sub>3</sub>)

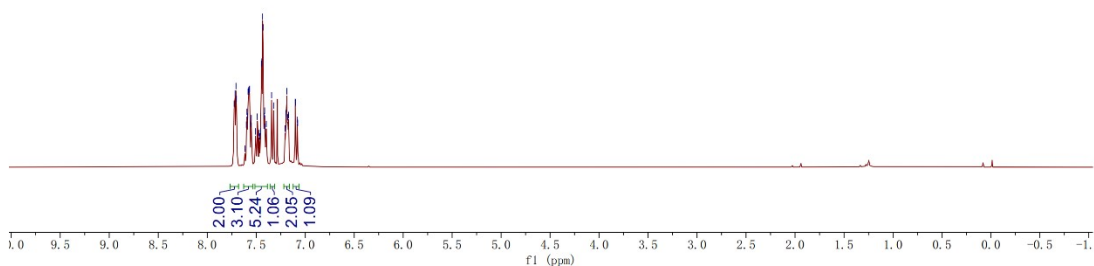

160.124  
156.974  
153.944  
140.108  
133.877  
131.132  
130.998  
130.057  
129.339  
129.006  
128.774  
128.559  
128.399  
126.586  
124.822  
120.084  
117.100

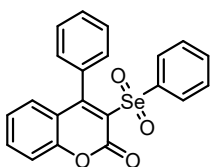

6 (<sup>13</sup>C NMR) (100 MHz, CDCl<sub>3</sub>)

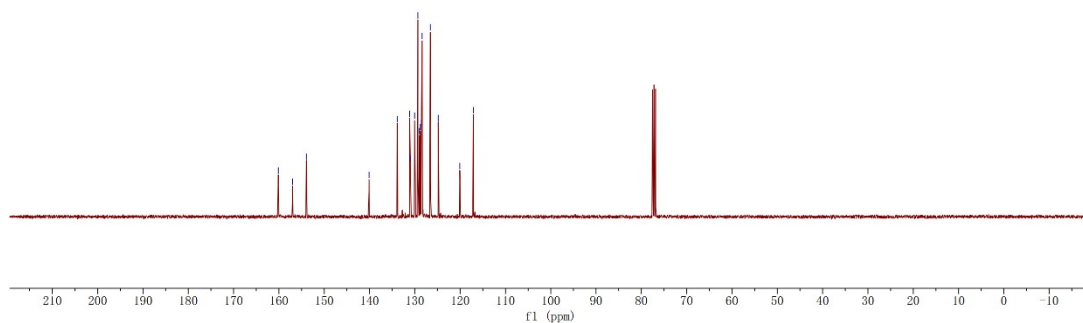

Supplement: d4gc03842h1.pdf [file d4gc03842h1.pdf]
